# Supplementary material for: Reversible and Irreversible [2+2] Cycloaddition Reactions of Heteroallenes to a Gallaphosphene
Source: PubMed Central journal article supplement — Angew Chem Int Ed Engl. 2021 Aug 26;60(40):21784–8. doi: 10.1002/anie.202108370 (PMC8519123; doi:10.1002/anie.202108370), 2021-08-26
Supplement: ANIE-60-21784-s001.pdf [file ANIE-60-21784-s001.pdf]

Supporting Information

**Reversible and Irreversible [2+2] Cycloaddition Reactions of  
Heteroallenes to a Gallaphosphene**

*Mahendra K. Sharma, Christoph Wölper, Gebhard Haberhauer, and Stephan Schulz\**

anie\_202108370\_sm\_miscellaneous\_information.pdf

## Supporting Information

### 1. Experimental Section

### 2. Spectroscopic Characterization

**Figure S1-S4.**  $^1\text{H}$ ,  $^{13}\text{C}$ ,  $^{31}\text{P}$  NMR and IR spectra of **2**.

**Figure S5-S8.**  $^1\text{H}$ ,  $^{13}\text{C}$ ,  $^{31}\text{P}$  NMR and IR spectra of **3**.

**Figure S9, S10.**  $^1\text{H}$  and  $^{31}\text{P}$  NMR spectra of temperature-dependent reversible reaction of DIC and gallaphosphene **1**.

**Figure S11, S12.**  $^1\text{H}$  and  $^{31}\text{P}$  NMR spectra of temperature dependent reversible reaction of DCC and gallaphosphene **1**.

**Figure S13-S14.** Stacked variable temperature (VT)  $^1\text{H}$  and  $^{31}\text{P}$  NMR spectra of **2**.

**Figure S15-S16.** Stacked variable temperature (VT)  $^1\text{H}$  and  $^{31}\text{P}$  NMR spectra of **3**.

**Figure S17-S20.**  $^1\text{H}$ ,  $^{13}\text{C}$ ,  $^{31}\text{P}$  NMR and IR spectra of **4**.

**Figure S21-S24.**  $^1\text{H}$ ,  $^{13}\text{C}$ ,  $^{31}\text{P}$  NMR and IR spectra of **5**.

**Figure S25-S28.**  $^1\text{H}$ ,  $^{13}\text{C}$ ,  $^{31}\text{P}$  NMR and IR spectra of **6**.

**Figure S29, S30.**  $^1\text{H}$  and  $^{31}\text{P}$  NMR spectra of reaction of compound **2** with  $\text{CO}_2$ .

**Figure S31, S32.**  $^1\text{H}$  and  $^{31}\text{P}$  NMR spectra of reaction of compound **3** with  $\text{CO}_2$ .

**Figure S33-S36.**  $^1\text{H}$ ,  $^{13}\text{C}$ ,  $^{31}\text{P}$  NMR and IR spectra of **7**.

**Figure S37-S40.**  $^1\text{H}$ ,  $^{13}\text{C}$ ,  $^{31}\text{P}$  NMR and IR spectra of **8**.

**Figure S41-S44.**  $^1\text{H}$ ,  $^{13}\text{C}$ ,  $^{31}\text{P}$  NMR and IR spectra of **9**.

**Figure S45, S46.**  $^1\text{H}$  and  $^{31}\text{P}$  NMR spectra of temperature dependent reversible reaction of  $\text{CO}_2$  with compound **4**.

**Figure S47, S48.**  $^1\text{H}$  and  $^{31}\text{P}$  NMR spectra of temperature dependent reversible reaction of  $\text{CO}_2$  with compound **5**.

**Figure S49, S50.**  $^1\text{H}$  and  $^{31}\text{P}$  NMR spectra of temperature dependent reversible reaction of  $\text{CO}_2$  with compound **6**.

### 3. Crystallographic Details

**Table S1-S2.** Crystal data and structure refinement parameters of **2**, **6**, **8**, and **9**.

**Figure S51-S54.** Molecular structures of **2**, **6**, **8**, and **9**.

### 4. Computational Details

### 5. Cartesian Coordinates and Absolute Energies for All Calculated Compounds

**Table S3.** Absolute energies [au] of **1**, **2**, **4**, **7**, **10-15** and **RS1-RS9** calculated by means B3LYP-D3BJ/def2-TZVP.

**Table S4.** Absolute energies [au] of **1**, **4**, **10**, **TS<sub>1→4</sub>** and **TS<sub>1→10</sub>** calculated by means of different methods.

### 6. References

## 1. Experimental Section

**General procedure.** All experiments and manipulations were carried out under a dry argon atmosphere using either standard Schlenk or glovebox techniques. Toluene, benzene, and *n*-hexane were dried using an MBraun solvent drying system (SPS), degassed, and stored over 4Å molecular sieve. Deuterated solvents ( $C_6D_6$ , toluene- $d_8$ ) were dried by refluxing over NaK alloy, distilled prior to use, and stored over 4Å molecular sieve. Commercial reagents were purchased from Aldrich, Acros, or Alfa-Aesar Chemical Co. and used as received. LGa(Cl)PLGa **1** ( $L = HC[C(Me)N(Ar)]_2$ ,  $Ar = 2,6\text{-}iPr_2\text{-}C_6H_3$ ), was prepared by literature method.<sup>[1]</sup> NMR spectra ( $\delta$  in ppm) were recorded using a Bruker Avance DPX 300 ( $^1H$  300 MHz,  $^{13}C\{^1H\}$  75 MHz,  $^{31}P\{^1H\}$  121 MHz), a Bruker Avance II 500 ( $^1H$  500 MHz,  $^{13}C\{^1H\}$  126 MHz,  $^{31}P\{^1H\}$  202 MHz), or a Bruker Avance III HD 600 ( $^1H$  600 MHz,  $^{13}C\{^1H\}$  151 MHz,  $^{31}P\{^1H\}$  243 MHz) spectrometer and were referenced to internal  $C_6D_5H$  ( $^1H$   $\delta = 7.16$ ;  $^{13}C$   $\delta = 128.06$ ) or  $C_7D_7H$  ( $^1H$   $\delta = 2.08, 6.97, 7.01, 7.09$ ;  $^{13}C$   $\delta = 137.48, 128.87, 127.96, 125.13, 20.43$ ), the  $^{31}P$  NMR spectra are referenced to internal  $C_6D_5H$  ( $^1H$   $\delta = 7.16$ ) or  $C_7D_7H$  ( $^1H$   $\delta = 2.08, 6.97, 7.01, 7.09$ ) using chi-values ( $\chi$ ).<sup>[2]</sup> Elemental analyses were performed at the *Elementaranalyse Labor* of the University of Duisburg-Essen. IR spectra were recorded by a Bruker ALPHA-T FT-IR spectrometer equipped with a single-reflection ATR sampling module.

**Synthesis of 2:** *N,N'*-diisopropylcarbodiimide (45 mg, 0.29 mmol) was added to a toluene solution (10 mL) of **1** (300 mg, 0.29 mmol). After shaking the reaction mixture at ambient temperature for one minute, all volatiles were removed under vacuum to yield a colorless crystalline solid. Yield: 99% (330 mg). M.p. 91 °C (dec.). Single crystals suitable for X-ray diffraction were grown by cooling a toluene solution of **2** at -30 °C for 12 h. Anal. calcd. (%) for  $C_{65}H_{96}ClGa_2N_6P$  (1164.56): C, 66.88; H, 8.29; N, 7.20. Found: C, 66.95; H, 8.37; N, 7.31.  $^1H$  NMR (600 MHz,  $C_6D_6$ , 298 K)  $\delta = 0.85$  (d,  $^3J_{HH} = 6.7$  Hz, 6H,  $CH(CH_3)_2$ ), 0.91 (d,  $^3J_{HH} = 6.8$  Hz, 6H,  $CH(CH_3)_2$ ), 0.98 (d,  $^3J_{HH} = 6.7$  Hz, 6H,  $CH(CH_3)_2$ ), 1.06 (d,  $^3J_{HH} = 6.8$  Hz, 6H,  $CH(CH_3)_2$ ), 1.22 (d,  $^3J_{HH} = 6.7$  Hz, 6H,  $CH(CH_3)_2$ ), 1.24 (d,  $^3J_{HH} = 6.8$  Hz, 6H,  $CH(CH_3)_2$ ), 1.31 (s, 6H,  $CCH_3$ ), 1.39 (d,  $^3J_{HH} = 6.0$  Hz, 6H,  $NCH(CH_3)_2$ ), 1.50 (d,  $^3J_{HH} = 6.7$  Hz, 6H,  $CH(CH_3)_2$ ), 1.52 (s, 6H,  $CCH_3$ ), 1.54 (d,  $^3J_{HH} = 6.7$  Hz, 6H,  $CH(CH_3)_2$ ), 1.61 (d,  $^3J_{HH} = 6.4$  Hz, 6H,  $NCH(CH_3)_2$ ), 2.98 (sept,  $^3J_{HH} = 6.0$  Hz, 1H,  $NCH(CH_3)_2$ ), 3.04 (sept,  $^3J_{HH} = 6.7$  Hz, 2H,  $CH(CH_3)_2$ ), 3.25 (sept,  $^3J_{HH} = 6.7$  Hz, 2H,  $CH(CH_3)_2$ ), 3.49 (sept,  $^3J_{HH} = 6.8$  Hz, 2H,  $CH(CH_3)_2$ ), 3.54 (sept,  $^3J_{HH} = 6.8$  Hz, 2H,  $CH(CH_3)_2$ ), 4.23 (sept,  $^3J_{HH} = 6.3$  Hz, 1H,  $NCH(CH_3)_2$ ), 4.71 (s, 1H,  $CH$ ), 4.76 (s, 1H,  $CH$ ), 6.90 (t,  $^3J_{HH} = 7.6$  Hz, 2H,  $C_6H_3$ ), 6.99-7.02 (m, 3H,  $C_6H_3$ ), 7.12-7.14 (m, 2H,  $C_6H_3$ ), 7.16-7.17 (m, 3H,  $C_6H_3$ ), 7.19 (t,  $^3J_{HH} = 7.6$  Hz, 2H,  $C_6H_3$ ).  $^{13}C\{^1H\}$  NMR (151 MHz,  $C_6D_6$ , 298 K)  $\delta = 21.6, 24.5, 24.8, 24.9, 25.0, 25.4, 25.6, 25.7, 25.9, 26.6, 27.1$

(CH(CH<sub>3</sub>)<sub>2</sub>); 28.1, 28.3, 28.4, 28.6, 29.4, 29.6 (CH(CH<sub>3</sub>)<sub>2</sub>); 48.7 (d, <sup>3</sup>J<sub>PC</sub> = 5.4 Hz, NCH(CH<sub>3</sub>)<sub>2</sub>), 62.3 (d, <sup>3</sup>J<sub>PC</sub> = 13.8 Hz, NCH(CH<sub>3</sub>)<sub>2</sub>); 98.1, 98.2 (CH); 124.0, 125.0, 125.8, 127.3, 128.8, 129.5, 138.0, 143.4, 144.0, 144.4, 144.8, 145.9 (C<sub>6</sub>H<sub>3</sub>); 166.8 (d, <sup>1</sup>J<sub>PC</sub> = 38.7 Hz, CNCH(CH<sub>3</sub>)<sub>2</sub>); 170.1, 171.5 (C<sub>6</sub>H<sub>3</sub>). <sup>31</sup>P{<sup>1</sup>H} (243 MHz, C<sub>6</sub>D<sub>6</sub>, 298 K) δ = -108.6 ppm. ATR-IR: ν 2960, 2921, 2864, 1573, 1524, 1463, 1386, 1314, 1254, 1209, 1168, 1106, 1018, 938, 859, 793, 757, 729, 695, 620, 581, 527 cm<sup>-1</sup>.

**Synthesis of 3:** Compound **3** was synthesized by following the similar protocols used for **2** using *N,N*-dicyclohexylcarbodiimide (59 mg, 0.29 mmol), **1** (300 mg, 0.29 mmol), and toluene (10 mL). Yield: 99% (358 mg, colorless solid). M.p. 93 °C (dec.). Anal. calcd. (%) for C<sub>71</sub>H<sub>104</sub>ClGa<sub>2</sub>N<sub>6</sub>P (1244.63): C, 68.36; H, 8.40; N, 6.74. Found: C, 68.47; H, 8.51; N, 6.89. <sup>1</sup>H NMR (600 MHz, toluene-d<sub>8</sub>, 298 K) δ = 0.89 (d, <sup>3</sup>J<sub>HH</sub> = 6.6 Hz, 6H, CH(CH<sub>3</sub>)<sub>2</sub>), 0.95 (d, <sup>3</sup>J<sub>HH</sub> = 6.6 Hz, 12H, CH(CH<sub>3</sub>)<sub>2</sub>), 1.01 (d, <sup>3</sup>J<sub>HH</sub> = 6.8 Hz, 6H, CH(CH<sub>3</sub>)<sub>2</sub>), 1.10 (d, <sup>3</sup>J<sub>HH</sub> = 6.7 Hz, 2H, CyH), 1.15 (d, <sup>3</sup>J<sub>HH</sub> = 6.7 Hz, 2H, CyH), 1.18 (d, <sup>3</sup>J<sub>HH</sub> = 6.6 Hz, 6H, CH(CH<sub>3</sub>)<sub>2</sub>), 1.25 (d, <sup>3</sup>J<sub>HH</sub> = 6.7 Hz, 6H, CH(CH<sub>3</sub>)<sub>2</sub>), 1.31 (d, <sup>3</sup>J<sub>HH</sub> = 12.4 Hz, 3H, CyH), 1.36 (s, 6H, CCH<sub>3</sub>), 1.42 (d, <sup>3</sup>J<sub>HH</sub> = 6.6 Hz, 6H, CH(CH<sub>3</sub>)<sub>2</sub>), 1.45 (d, <sup>3</sup>J<sub>HH</sub> = 6.6 Hz, 6H, CH(CH<sub>3</sub>)<sub>2</sub>), 1.49-1.52 (m, 3H, CyH), 1.57 (s, 6H, CCH<sub>3</sub>), 1.61 (d, <sup>3</sup>J<sub>HH</sub> = 9.4 Hz, 1H, CyH), 1.76 (s, 1H, CyH), 1.88-1.94 (m, 6H, CyH), 2.69 (bs, 1H, CyH), 2.81 (d, <sup>3</sup>J<sub>HH</sub> = 11.1 Hz, 2H, CyH), 2.96 (sept, <sup>3</sup>J<sub>HH</sub> = 6.6 Hz, 2H, CH(CH<sub>3</sub>)<sub>2</sub>), 3.15 (sept, <sup>3</sup>J<sub>HH</sub> = 6.6 Hz, 2H, CH(CH<sub>3</sub>)<sub>2</sub>), 3.50 (sept, <sup>3</sup>J<sub>HH</sub> = 6.8 Hz, 4H, CH(CH<sub>3</sub>)<sub>2</sub>), 3.69 (t, <sup>3</sup>J<sub>HH</sub> = 10.93 Hz, 1H, CyH), 4.79 (s, 1H, CH), 4.81 (s, 1H, CH), 6.93 (t, <sup>3</sup>J<sub>HH</sub> = 7.3 Hz, 2H, C<sub>6</sub>H<sub>3</sub>), 7.00 (t, <sup>3</sup>J<sub>HH</sub> = 6.7 Hz, 2H, C<sub>6</sub>H<sub>3</sub>), 7.06-7.13 (m, 6H, C<sub>6</sub>H<sub>3</sub>), 7.16 (t, <sup>3</sup>J<sub>HH</sub> = 6.7 Hz, 2H, C<sub>6</sub>H<sub>3</sub>). <sup>13</sup>C{<sup>1</sup>H} NMR (151 MHz, C<sub>6</sub>D<sub>6</sub>, 298 K) δ = 23.8, 24.0, 24.4, 24.5, 24.7, 25.0, 25.1, 25.2, 25.3, 26.3, 26.5, 26.8, 27.3, 27.6 (CH(CH<sub>3</sub>)<sub>2</sub>, Cy); 28.0, 28.9, 29.0, 34.2, 36.0 (CH(CH<sub>3</sub>)<sub>2</sub>, Cy); 57.5 (d, <sup>3</sup>J<sub>PC</sub> = 3.6 Hz, NCH(CH<sub>3</sub>)<sub>2</sub>), 67.7 (d, <sup>3</sup>J<sub>PC</sub> = 14.4 Hz, NCH(CH<sub>3</sub>)<sub>2</sub>); 97.0, 97.8 (CH); 123.3, 124.1, 124.4, 126.8, 127.1, 140.4, 143.0, 143.3, 143.8, 144.3, 145.2 (C<sub>6</sub>H<sub>3</sub>); 165.5 (d, <sup>1</sup>J<sub>PC</sub> = 41.5 Hz, CNCH(CH<sub>3</sub>)<sub>2</sub>); 169.2, 170.6 (C<sub>6</sub>H<sub>3</sub>). <sup>31</sup>P{<sup>1</sup>H} (243 MHz, C<sub>6</sub>D<sub>6</sub>, 298 K) δ = -105.3 ppm. ATR-IR: ν 2957, 2908, 2848, 1547, 1433, 1386, 1367, 1313, 1252, 1205, 1172, 1103, 1022, 936, 860, 795, 628, 556 cm<sup>-1</sup>.

**Synthesis of 4:** Ethylisocyanate (31 μL, 0.38 mmol) was added to a toluene solution (15 mL) of **1** (400 mg, 0.38 mmol) at ambient temperature. After shaking the reaction mixture at this temperature for one minute, all volatiles were removed under vacuum to yield a colorless crystalline solid. Yield: 99% (420 mg). M.p. 141 °C (dec.). Anal. calcd. (%) for C<sub>61</sub>H<sub>87</sub>ClGa<sub>2</sub>N<sub>5</sub>OP (1109.48): C, 65.87; H, 7.88; N, 6.30. Found: C, 65.97; H, 7.93; N, 6.37. <sup>1</sup>H NMR (300 MHz, toluene-d<sub>8</sub>, 298 K) δ = 0.91 (d, <sup>3</sup>J<sub>HH</sub> = 6.6 Hz, 6H, CH(CH<sub>3</sub>)<sub>2</sub>), 0.98 (t, <sup>3</sup>J<sub>HH</sub> = 7.5 Hz, 6H, CH(CH<sub>3</sub>)<sub>2</sub>), 1.03-1.06 (m, 18H, CH(CH<sub>3</sub>)<sub>2</sub>), 1.08-1.10 (m, 9H, CH(CH<sub>3</sub>)<sub>2</sub>, NCH<sub>2</sub>CH<sub>3</sub>), 1.17 (d, <sup>3</sup>J<sub>HH</sub> = 6.7 Hz, 6H, CH(CH<sub>3</sub>)<sub>2</sub>), 1.23

(d,  $^3J_{\text{HH}} = 6.7$  Hz, 6H,  $\text{CH}(\text{CH}_3)_2$ ), 1.38 (s, 6H,  $\text{CCH}_3$ ), 1.50 (s, 6H,  $\text{CCH}_3$ ), 2.85 (sept,  $^3J_{\text{HH}} = 6.8$  Hz, 2H,  $\text{CH}(\text{CH}_3)_2$ ), 3.15 (sept,  $^3J_{\text{HH}} = 6.8$  Hz, 4H,  $\text{CH}(\text{CH}_3)_2$ ), 3.36 (sept,  $^3J_{\text{HH}} = 6.8$  Hz, 2H,  $\text{CH}(\text{CH}_3)_2$ ), 3.48 (sept,  $^3J_{\text{HH}} = 6.7$  Hz, 2H,  $\text{NCH}_2\text{CH}_3$ ), 4.73 (s, 1H,  $\text{CH}$ ), 4.83 (s, 1H,  $\text{CH}$ ), 7.00-7.03 (m, 4H,  $\text{C}_6\text{H}_3$ ), 7.10-7.17 (m, 6H,  $\text{C}_6\text{H}_3$ ).  $^{13}\text{C}\{^1\text{H}\}$  NMR (126 MHz, toluene- $d_8$ , 298 K)  $\delta = 14.3, 15.4$  ( $\text{NCH}_2\text{CH}_3$ ); 21.3, 23.1, 24.1, 24.3, 24.4, 24.5, 24.9, 25.3, 26.0 ( $\text{CH}(\text{CH}_3)_2$ ); 27.8, 28.1, 28.3, 28.8, 29.7, 32.0 ( $\text{CH}(\text{CH}_3)_2$ ); 39.3 (d,  $^3J_{\text{PC}} = 2.6$  Hz,  $\text{NCH}_2\text{CH}_3$ ); 97.4, 98.1 ( $\text{CH}$ ); 123.9, 124.4, 124.5, 125.6, 127.4, 137.7, 141.2, 142.1, 142.3, 143.3, 145.2, 145.4, 169.2, 170.8 ( $\text{C}_6\text{H}_3$ ); 179.7 (d,  $^1J_{\text{PC}} = 13.8$  Hz,  $\text{NCO}$ ).  $^{31}\text{P}\{^1\text{H}\}$  (121 MHz,  $\text{C}_6\text{D}_6$ , 298 K)  $\delta = -112.0$  ppm. ATR-IR:  $\nu$  2964, 2925, 2865, 1605, 1527, 1438, 1381, 1315, 1261, 1225, 1178, 1099, 1021, 935, 867, 795, 757, 727, 633, 531  $\text{cm}^{-1}$ .

**Synthesis of 5:** Compound **5** was synthesized by following the similar protocols used for **4** using isopropylisocyanate (29  $\mu\text{L}$ , 0.29 mmol), **1** (300 mg, 0.29 mmol), and toluene (10 mL). Yield: 99% (496mg, colorless solid). M.p. 147  $^\circ\text{C}$  (dec.). Anal. calcd. (%) for  $\text{C}_{62}\text{H}_{89}\text{ClGa}_2\text{N}_5\text{OP}$  (1123.50): C, 66.12; H, 7.96; N, 6.22. Found: C, 66.20; H, 7.99; N, 6.33.  $^1\text{H}$  NMR (600 MHz,  $\text{C}_6\text{D}_6$ , 298 K)  $\delta = 0.95$  (d,  $^3J_{\text{HH}} = 6.6$  Hz, 6H,  $\text{CH}(\text{CH}_3)_2$ ), 1.06-1.08 (m, 18H,  $\text{CH}(\text{CH}_3)_2$ ), 1.13 (d,  $^3J_{\text{HH}} = 6.8$  Hz, 6H,  $\text{CH}(\text{CH}_3)_2$ ), 1.18 (d,  $^3J_{\text{HH}} = 6.6$  Hz, 6H,  $\text{CH}(\text{CH}_3)_2$ ), 1.24 (d,  $^3J_{\text{HH}} = 6.8$  Hz, 6H,  $\text{CH}(\text{CH}_3)_2$ ), 1.31 (d,  $^3J_{\text{HH}} = 6.7$  Hz, 6H,  $\text{CH}(\text{CH}_3)_2$ ), 1.33 (s, 6H,  $\text{CCH}_3$ ), 1.43 (d,  $^3J_{\text{HH}} = 6.7$  Hz, 6H,  $\text{CH}(\text{CH}_3)_2$ ), 1.50 (s, 6H,  $\text{CCH}_3$ ), 2.86 (sept,  $^3J_{\text{HH}} = 6.8$  Hz, 2H,  $\text{CH}(\text{CH}_3)_2$ ), 3.38 (sept,  $^3J_{\text{HH}} = 6.8$  Hz, 2H,  $\text{CH}(\text{CH}_3)_2$ ), 3.42 (sept,  $^3J_{\text{HH}} = 6.8$  Hz, 2H,  $\text{CH}(\text{CH}_3)_2$ ), 3.58 (sept,  $^3J_{\text{HH}} = 6.8$  Hz, 2H,  $\text{CH}(\text{CH}_3)_2$ ), 3.67 (sept,  $^3J_{\text{HH}} = 6.5$  Hz, 2H,  $\text{NCH}(\text{CH}_3)_2$ ), 4.76 (s, 1H,  $\text{CH}$ ), 4.88 (s, 1H,  $\text{CH}$ ), 7.01-7.03 (m, 4H,  $\text{C}_6\text{H}_3$ ), 7.11-7.14 (m, 4H,  $\text{C}_6\text{H}_3$ ), 7.16-7.18 (m, 4H,  $\text{C}_6\text{H}_3$ ).  $^{13}\text{C}\{^1\text{H}\}$  NMR (151 MHz,  $\text{C}_6\text{D}_6$ , 298 K)  $\delta = 21.4$  ( $\text{NCH}(\text{CH}_3)_2$ ); 24.0, 24.2, 24.3, 24.5, 24.6, 25.1, 25.3, 25.7, 26.5 ( $\text{CH}(\text{CH}_3)_2$ ); 27.9, 28.1, 28.3, 28.7, 29.6 ( $\text{CH}(\text{CH}_3)_2$ ); 46.6 ( $\text{NCH}(\text{CH}_3)_2$ ); 98.3, 98.8 ( $\text{CH}$ ); 124.0, 124.5, 125.0, 125.7, 127.2, 128.5, 129.3, 137.9, 141.6, 142.2, 142.7, 143.3, 145.4, 145.5, 169.3, 170.8 ( $\text{C}_6\text{H}_3$ ); 180.4 (d,  $^1J_{\text{PC}} = 14.9$  Hz,  $\text{NCO}$ ).  $^{31}\text{P}\{^1\text{H}\}$  (243 MHz,  $\text{C}_6\text{D}_6$ , 298 K)  $\delta = -114.8$  ppm. ATR-IR:  $\nu$  2963, 2924, 2865, 1623, 1517, 1462, 1435, 1380, 1317, 1254, 1203, 1175, 1101, 1021, 935, 864, 795, 760, 542, 531  $\text{cm}^{-1}$ .

**Synthesis of 6:** Compound **6** was synthesized by following the similar protocols used for **4** using cyclohexylisocyanate (37  $\mu\text{L}$ , 0.29 mmol), **1** (300 mg, 0.29 mmol), and toluene (10 mL). Yield: 98% (330 mg, colorless solid). Single crystals suitable for X-ray diffraction were grown by cooling an *n*-hexane solution of **6** at  $-30$   $^\circ\text{C}$  for 12 h. M.p. 143  $^\circ\text{C}$  (dec.). Anal. calcd. (%) for  $\text{C}_{65}\text{H}_{93}\text{ClGa}_2\text{N}_5\text{OP}$  (1163.53): C, 66.94; H, 8.04; N, 6.00. Found: C, 67.03; H, 8.11; N, 6.03.  $^1\text{H}$  NMR (600 MHz,  $\text{C}_6\text{D}_6$ , 298 K)  $\delta = 0.87$  (t,  $^3J_{\text{HH}} = 7.1$  Hz, 3H,  $\text{CH}(\text{CH}_3)_2$ ), 0.92 (d,  $^3J_{\text{HH}} = 6.6$  Hz, 6H,  $\text{CH}(\text{CH}_3)_2$ ), 1.04-1.06 (m, 18H,  $\text{CH}(\text{CH}_3)_2$ ,  $\text{CH}_2$ ), 1.15 (d,  $^3J_{\text{HH}} = 6.8$  Hz, 6H,  $\text{CH}(\text{CH}_3)_2$ ), 1.21 (d,  $^3J_{\text{HH}} = 6.8$  Hz, 6H,

CH(CH<sub>3</sub>)<sub>2</sub>), 1.23-1.26 (m, 2H, CH<sub>2</sub>), 1.30 (d, <sup>3</sup>J<sub>HH</sub> = 6.8 Hz, 6H, CH(CH<sub>3</sub>)<sub>2</sub>), 1.31 (s, 6H, CCH<sub>3</sub>), 1.42 (d, <sup>3</sup>J<sub>HH</sub> = 6.7 Hz, 6H, CH(CH<sub>3</sub>)<sub>2</sub>), 1.47 (s, 6H, CCH<sub>3</sub>), 1.73 (d, <sup>3</sup>J<sub>HH</sub> = 11.3 Hz, 2H, CH<sub>2</sub>), 2.29 (d, <sup>3</sup>J<sub>HH</sub> = 11.3 Hz, 2H, CH<sub>2</sub>), 2.85 (sept, <sup>3</sup>J<sub>HH</sub> = 6.8 Hz, 2H, CH(CH<sub>3</sub>)<sub>2</sub>), 3.29 (m, 1H, CH), 3.40 (sept, <sup>3</sup>J<sub>HH</sub> = 6.8 Hz, 4H, CH(CH<sub>3</sub>)<sub>2</sub>), 3.56 (sept, <sup>3</sup>J<sub>HH</sub> = 6.8 Hz, 2H, CH(CH<sub>3</sub>)<sub>2</sub>), 4.81 (s, 1H, CH), 4.86 (s, 1H, CH), 7.01 (dd, <sup>3</sup>J<sub>HH</sub> = 2.3, 6.8 Hz, 2H, C<sub>6</sub>H<sub>3</sub>), 7.08-7.11 (m, 3H, C<sub>6</sub>H<sub>3</sub>), 7.12-7.14 (m, 6H, C<sub>6</sub>H<sub>3</sub>), 7.18 (d, <sup>3</sup>J<sub>HH</sub> = 7.7 Hz, 1H, C<sub>6</sub>H<sub>3</sub>). <sup>13</sup>C{<sup>1</sup>H} NMR (151 MHz, C<sub>6</sub>D<sub>6</sub>, 298 K) δ = 14.5, 23.2, 24.4, 24.5, 24.7, 25.4, 25.5, 25.8, 26.6, 26.7 (CH(CH<sub>3</sub>)<sub>2</sub>); 27.4, 28.1, 28.3, 28.5, 28.8, 29.8 (CH(CH<sub>3</sub>)<sub>2</sub>, Cy); 32.1, 34.4, 56.2 (Cy); 98.5, 98.9 (CH); 124.2, 124.7, 125.2, 127.4, 141.9, 142.3, 142.9, 143.5, 145.6, 169.5, 170.0 (C<sub>6</sub>H<sub>3</sub>); 180.4 (d, <sup>1</sup>J<sub>PC</sub> = 15.0 Hz, NCO). <sup>31</sup>P{<sup>1</sup>H} (243 MHz, C<sub>6</sub>D<sub>6</sub>, 298 K) δ = -115.4 ppm. ATR-IR: ν 2955, 2921, 2862, 1608, 1519, 1436, 1386, 1318, 1318, 1255, 1205, 1177, 1098, 1016, 935, 864, 795, 759, 637, 541 cm<sup>-1</sup>.

**Reaction of 2 with CO<sub>2</sub>:** A toluene solution (5 mL) of **2** (150 mg, 0.13 mmol) in a *J*-Young Schlenk flask was degassed using the freeze pump-thaw method. CO<sub>2</sub> (1 bar) gas was added, and the solution was stirred at ambient temperature for 1 h. All volatiles were then removed in *vacuo* to yield a colorless crystalline powder. The <sup>31</sup>P{<sup>1</sup>H} NMR spectrum at 25 °C shows two sharp singlets, which were assigned to the mono and double<sup>[1]</sup> CO<sub>2</sub> addition products. Unfortunately, due to the similar solubility of these two products, we failed to isolate a pure sample of the mono CO<sub>2</sub> addition product. The crude <sup>1</sup>H and <sup>31</sup>P{<sup>1</sup>H} NMR spectra of the mixture are provided to confirm the bulk material's constitutions match (Figures S29-S30).

**Reaction of 3 with CO<sub>2</sub>:** Compound **3** also led to the mono and double<sup>[1]</sup> CO<sub>2</sub> addition products at room temperature, when exposed to CO<sub>2</sub> gas (1 bar) in toluene similar to compound **2**. Again, we failed to isolate a sample of the pure mono CO<sub>2</sub> addition product due to the similar solubility of these two products. The <sup>1</sup>H and <sup>31</sup>P{<sup>1</sup>H} NMR spectra of this mixture are provided to confirm the bulk material's constitutions match (Figures S30-S31).

**Synthesis of 7:** A toluene solution (5 mL) of **4** (150 g, 0.13 mmol) in a *J*-Young Schlenk flask was degassed using the freeze pump-thaw method. CO<sub>2</sub> (1 bar) gas was added and the solution was stirred at room temperature for 1 h. All volatiles were then removed in *vacuo* to yield a colorless crystalline powder of **7**. Yield: 97% (150 mg). M.p. 93 °C (dec.). Anal. calcd. (%) for C<sub>62</sub>H<sub>87</sub>ClGa<sub>2</sub>N<sub>5</sub>O<sub>3</sub>P (1153.47): C, 64.40; H, 7.58; N, 6.06. Found: C, 64.47; H, 7.66; N, 6.11. <sup>1</sup>H NMR (500 MHz, toluene-d<sub>8</sub>, 298 K) δ = 0.79 (t, <sup>3</sup>J<sub>HH</sub> = 7.3 Hz, 3H, CH<sub>2</sub>CH<sub>3</sub>), 0.99 (d, <sup>3</sup>J<sub>HH</sub> = 6.8 Hz, 6H, CH(CH<sub>3</sub>)<sub>2</sub>), 1.04 (d, <sup>3</sup>J<sub>HH</sub> = 6.8 Hz, 6H, CH(CH<sub>3</sub>)<sub>2</sub>), 1.10 (d, <sup>3</sup>J<sub>HH</sub> = 6.7 Hz, 6H, CH(CH<sub>3</sub>)<sub>2</sub>), 1.14 (d, <sup>3</sup>J<sub>HH</sub> = 6.8 Hz, 6H, CH(CH<sub>3</sub>)<sub>2</sub>), 1.22 (d, <sup>3</sup>J<sub>HH</sub> = 6.8 Hz, 6H, CH(CH<sub>3</sub>)<sub>2</sub>), 1.26 (d, <sup>3</sup>J<sub>HH</sub> = 6.8 Hz, 6H, CH(CH<sub>3</sub>)<sub>2</sub>), 1.29 (d, <sup>3</sup>J<sub>HH</sub> = 6.8 Hz, 6H, CH(CH<sub>3</sub>)<sub>2</sub>), 1.40 (d, <sup>3</sup>J<sub>HH</sub> = 6.8 Hz, 6H, CH(CH<sub>3</sub>)<sub>2</sub>),

1.42 (s, 6H, CCH<sub>3</sub>), 1.60 (s, 6H, CCH<sub>3</sub>), 2.92 (sept, <sup>3</sup>J<sub>HH</sub> = 6.8 Hz, 2H, CH(CH<sub>3</sub>)<sub>2</sub>), 3.01 (sept, <sup>3</sup>J<sub>HH</sub> = 6.7 Hz, 2H, CH(CH<sub>3</sub>)<sub>2</sub>), 3.14 (q, <sup>3</sup>J<sub>HH</sub> = 7.3 Hz, 2H, CH<sub>2</sub>CH<sub>3</sub>), 3.32 (sept, <sup>3</sup>J<sub>HH</sub> = 6.8 Hz, 2H, CH(CH<sub>3</sub>)<sub>2</sub>), 3.67 (sept, <sup>3</sup>J<sub>HH</sub> = 6.8 Hz, 2H, CH(CH<sub>3</sub>)<sub>2</sub>), 4.72 (s, 1H, CH), 4.86 (s, 1H, CH), 7.07-7.20 (m, 12H, C<sub>6</sub>H<sub>3</sub>). <sup>13</sup>C{<sup>1</sup>H} NMR (126 MHz, toluene-d<sub>8</sub>, 298 K) δ = 14.3, 21.3 (NCH<sub>2</sub>CH<sub>3</sub>); 23.6, 24.3, 24.4, 24.7, 24.8, 24.9 (CH(CH<sub>3</sub>)<sub>2</sub>); 26.2, 28.2, 28.8, 29.5 (CH(CH<sub>3</sub>)<sub>2</sub>); 32.0, 40.0 (CH<sub>2</sub>); 97.5, 97.6 (CH); 123.1, 124.5, 125.6, 126.9, 138.8, 142.2, 142.5, 143.8, 144.7, 146.1, 169.6, 172.0 (C<sub>6</sub>H<sub>3</sub>); 174.6 (d, <sup>1</sup>J<sub>CP</sub> = 28.4 Hz, OCO); 179.8 (d, <sup>1</sup>J<sub>CP</sub> = 15.6 Hz, NCO). <sup>31</sup>P{<sup>1</sup>H} (121 MHz, C<sub>6</sub>D<sub>6</sub>, 298 K) δ = -40.0 ppm. ATR-IR: ν 2964, 2925, 2863, 1943, 1667, 1521, 1436, 1383, 1315, 1251, 1174, 1097, 1018, 940, 867, 795, 757, 710, 636, 541 cm<sup>-1</sup>.

**Synthesis of 8:** Compound **8** was synthesized by following the similar protocols used for **7** using compound **5** (200 mg, 0.18 mmol), CO<sub>2</sub> gas (1 bar), and toluene (10 mL). Yield: 98% (200 mg, colorless solid). Single crystals suitable for X-ray diffraction were grown upon storage of saturated toluene solution of **8** at ambient temperature. M.p. 95 °C (dec.). Anal. calcd. (%) for C<sub>63</sub>H<sub>89</sub>ClGa<sub>2</sub>N<sub>5</sub>O<sub>3</sub>P (1167.49): C, 64.66; H, 7.67; N, 5.98. Found: C, 64.71; H, 7.73; N, 5.98. <sup>1</sup>H NMR (600 MHz, toluene-d<sub>8</sub>, 298 K) δ = 1.01 (d, <sup>3</sup>J<sub>HH</sub> = 6.8 Hz, 6H, CH(CH<sub>3</sub>)<sub>2</sub>), 1.05 (d, <sup>3</sup>J<sub>HH</sub> = 6.8 Hz, 6H, CH(CH<sub>3</sub>)<sub>2</sub>), 1.07 (d, <sup>3</sup>J<sub>HH</sub> = 6.8 Hz, 6H, CH(CH<sub>3</sub>)<sub>2</sub>), 1.10 (d, <sup>3</sup>J<sub>HH</sub> = 6.7 Hz, 6H, CH(CH<sub>3</sub>)<sub>2</sub>), 1.17 (d, <sup>3</sup>J<sub>HH</sub> = 6.8 Hz, 6H, CH(CH<sub>3</sub>)<sub>2</sub>), 1.21 (d, <sup>3</sup>J<sub>HH</sub> = 6.8 Hz, 6H, CH(CH<sub>3</sub>)<sub>2</sub>), 1.25 (d, <sup>3</sup>J<sub>HH</sub> = 6.8 Hz, 6H, CH(CH<sub>3</sub>)<sub>2</sub>), 1.29 (d, <sup>3</sup>J<sub>HH</sub> = 6.8 Hz, 6H, CH(CH<sub>3</sub>)<sub>2</sub>), 1.39 (s, 6H, CCH<sub>3</sub>), 1.44 (d, <sup>3</sup>J<sub>HH</sub> = 6.6 Hz, 6H, CH(CH<sub>3</sub>)<sub>2</sub>), 1.60 (s, 6H, CCH<sub>3</sub>), 2.98 (sept, <sup>3</sup>J<sub>HH</sub> = 6.7 Hz, 2H, CH(CH<sub>3</sub>)<sub>2</sub>), 3.03 (sept, <sup>3</sup>J<sub>HH</sub> = 6.7 Hz, 2H, CH(CH<sub>3</sub>)<sub>2</sub>), 3.32 (sept, <sup>3</sup>J<sub>HH</sub> = 6.8 Hz, 2H, CH(CH<sub>3</sub>)<sub>2</sub>), 3.61 (sept, <sup>3</sup>J<sub>HH</sub> = 6.5 Hz, 1H, NCH(CH<sub>3</sub>)<sub>2</sub>), 3.69 (sept, <sup>3</sup>J<sub>HH</sub> = 6.7 Hz, 2H, CH(CH<sub>3</sub>)<sub>2</sub>), 4.79 (s, 1H, CH), 4.86 (s, 1H, CH), 7.01-7.03 (m, 5H, C<sub>6</sub>H<sub>3</sub>), 7.08 (t, <sup>3</sup>J<sub>HH</sub> = 7.6 Hz, 3H, C<sub>6</sub>H<sub>3</sub>), 7.13 (t, <sup>3</sup>J<sub>HH</sub> = 6.7 Hz, 2H, C<sub>6</sub>H<sub>3</sub>), 7.17 (d, <sup>3</sup>J<sub>HH</sub> = 6.7 Hz, 2H, C<sub>6</sub>H<sub>3</sub>). <sup>13</sup>C{<sup>1</sup>H} NMR (151 MHz, toluene-d<sub>8</sub>, 298 K) δ = 22.7, 23.9, 24.3, 24.4, 24.6, 24.7, 24.9, 25.1, 25.2, 25.7, 26.4 (CH(CH<sub>3</sub>)<sub>2</sub>); 28.2, 28.5, 28.8, 29.4 (CH(CH<sub>3</sub>)<sub>2</sub>); 48.3 (NCH(CH<sub>3</sub>)<sub>2</sub>); 97.5, 98.8 (CH); 123.1, 124.5, 126.9, 139.3, 142.1, 142.5, 143.6, 144.9, 146.0, 169.5, 171.9 (C<sub>6</sub>H<sub>3</sub>); 174.4 (d, <sup>1</sup>J<sub>CP</sub> = 27.4 Hz, OCO); 180.6 (d, <sup>1</sup>J<sub>CP</sub> = 15.3 Hz, NCO). <sup>31</sup>P{<sup>1</sup>H} (121 MHz, toluene-d<sub>8</sub>, 298 K) δ = -34.5 ppm. ATR-IR: ν 2963, 2925, 2861, 1671, 1577, 1522, 1439, 1384, 1314, 1238, 1173, 1149, 1103, 1018, 937, 864, 795, 757, 730, 695, 642, 531 cm<sup>-1</sup>.

**Synthesis of 9:** Compound **9** was synthesized by following the similar protocols used for **7** using compound **7** (200 mg, 0.17 mmol), CO<sub>2</sub> gas (1 bar), and toluene (10 mL). Yield: 98% (200 mg, colorless solid). Single crystals suitable for X-ray diffraction were grown upon storage of saturated toluene solution of **9** at ambient temperature. M.p. 93 °C (dec.). Anal. calcd. (%) for C<sub>66</sub>H<sub>93</sub>ClGa<sub>2</sub>N<sub>5</sub>O<sub>3</sub>P (1207.52): C, 65.49; H, 7.74; N, 5.79. Found: C, 65.57; H, 7.82; N, 5.83. <sup>1</sup>H

NMR (600 MHz, toluene- $d_8$ , 298 K)  $\delta$  = 1.00 (d,  $^3J_{\text{HH}} = 6.8$  Hz, 6H,  $\text{CH}(\text{CH}_3)_2$ ), 1.10 (td,  $^3J_{\text{HH}} = 7.2$  Hz, 12H,  $\text{CH}(\text{CH}_3)_2$ ), 1.22 (td,  $^3J_{\text{HH}} = 6.7$  Hz, 12H,  $\text{CH}(\text{CH}_3)_2$ ), 1.25 (d,  $^3J_{\text{HH}} = 6.7$  Hz, 6H,  $\text{CH}(\text{CH}_3)_2$ ), 1.29 (d,  $^3J_{\text{HH}} = 6.8$  Hz, 6H,  $\text{CH}(\text{CH}_3)_2$ ), 1.39 (s, 6H,  $\text{CCH}_3$ ), 1.40 (d,  $^3J_{\text{HH}} = 6.8$  Hz, 6H,  $\text{CH}(\text{CH}_3)_2$ ), 1.43-1.54 (m, 5H,  $\text{CH}_2$ ), 1.59 (s, 6H,  $\text{CCH}_3$ ), 1.66 (m, 1H,  $\text{CH}_2$ ), 1.74 (br, 2H,  $\text{CH}_2$ ), 1.94 (br, 1H,  $\text{CH}_2$ ), 2.96 (sept,  $^3J_{\text{HH}} = 6.8$  Hz, 2H,  $\text{CH}(\text{CH}_3)_2$ ), 3.08 (sept,  $^3J_{\text{HH}} = 6.7$  Hz, 2H,  $\text{CH}(\text{CH}_3)_2$ ), 3.32 (sept,  $^3J_{\text{HH}} = 6.8$  Hz, 2H,  $\text{CH}(\text{CH}_3)_2$ ), 3.39 (br, 1H,  $\text{CH}$ ), 3.70 (sept,  $^3J_{\text{HH}} = 6.8$  Hz, 2H,  $\text{CH}(\text{CH}_3)_2$ ), 4.85 (s, 2H,  $\text{CH}$ ), 7.00-7.04 (m, 4H,  $\text{C}_6\text{H}_3$ ), 7.07-7.12 (m, 6H,  $\text{C}_6\text{H}_3$ ), 7.16 (d,  $^3J_{\text{HH}} = 6.4$  Hz, 2H,  $\text{C}_6\text{H}_3$ ).  $^{13}\text{C}\{^1\text{H}\}$  NMR (151 MHz, toluene- $d_8$ , 298 K)  $\delta$  = 23.9, 24.3, 24.4, 24.6, 24.9, 25.2, 25.4, 25.6, 26.3, 26.8, 27.0 ( $\text{CH}(\text{CH}_3)_2$ ); 28.2, 28.6, 29.4 ( $\text{CH}(\text{CH}_3)_2$ ); 32.7, 57.1 (NCy); 97.5, 98.8 ( $\text{CH}$ ); 123.2, 124.6, 124.7, 124.8, 125.4, 126.9, 139.2, 142.2, 142.5, 143.8, 144.7, 146.1, 169.5, 171.7 ( $\text{C}_6\text{H}_3$ ); 174.1 (d,  $^1J_{\text{CP}} = 28.3$  Hz, OCO); 181.1 (d,  $^1J_{\text{CP}} = 14.7$  Hz, NCO).  $^{31}\text{P}\{^1\text{H}\}$  (121 MHz, toluene- $d_8$ , 298 K)  $\delta$  = -35.0 ppm. ATR-IR:  $\nu$  2958, 2925, 2865, 1663, 1577, 1518, 1436, 1384, 1317, 1251, 1235, 1176, 1098, 1024, 938, 864, 795, 757, 734, 695, 649, 531  $\text{cm}^{-1}$ .

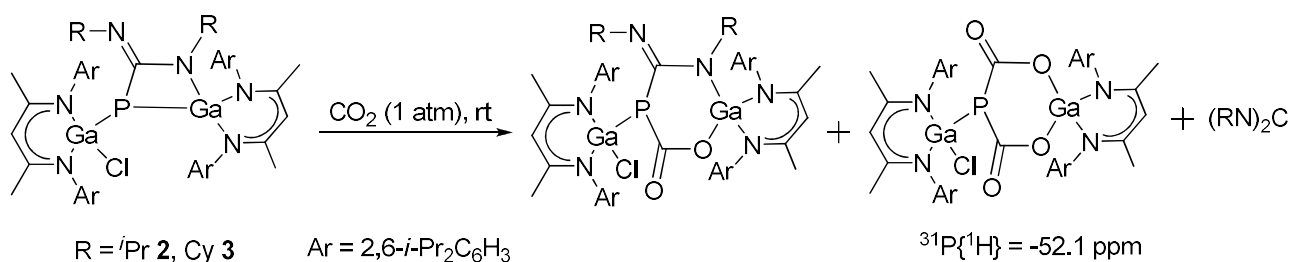

**Scheme S1.** Reactions of compounds **2** and **3** with  $\text{CO}_2$ .



## 2. Spectroscopic Characterization

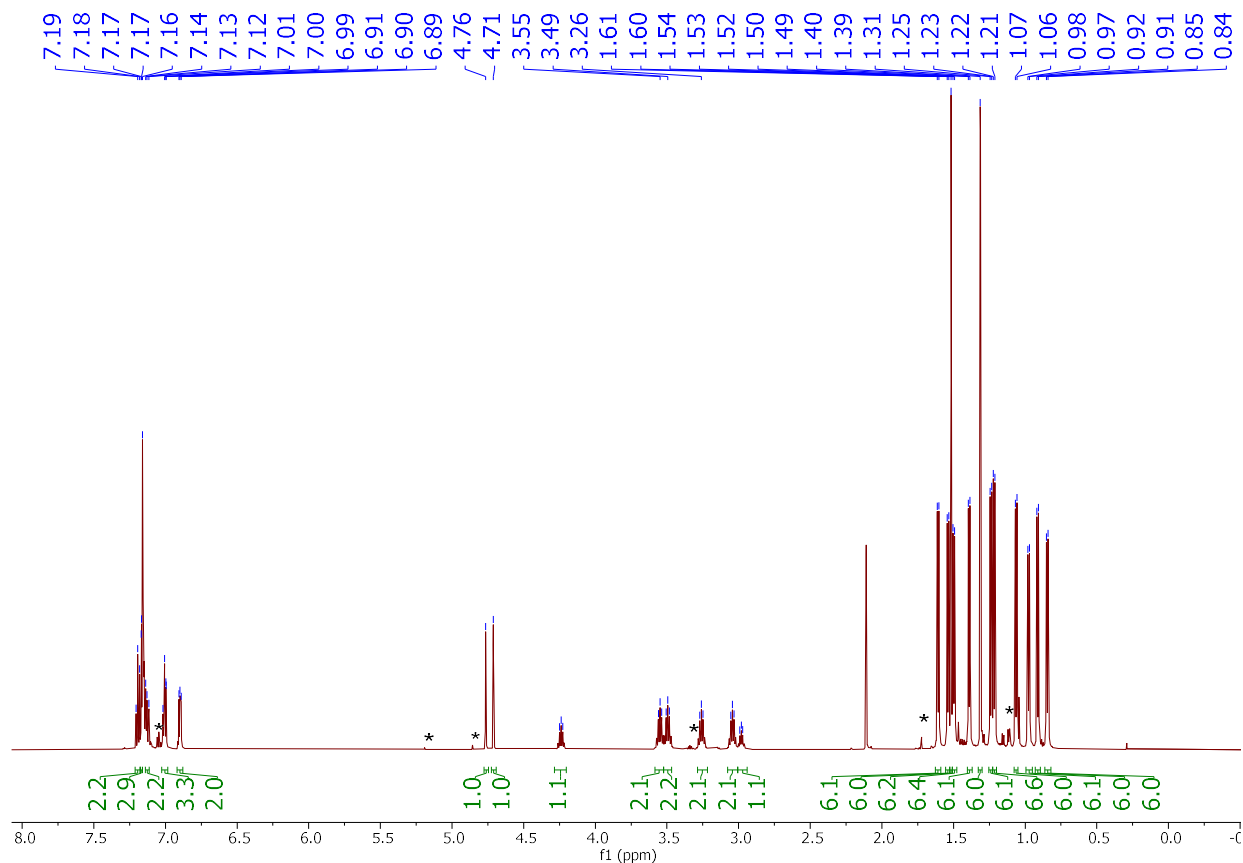

Figure S1. <sup>1</sup>H NMR (600 MHz, C<sub>6</sub>D<sub>6</sub>, 298 K) spectrum of compound 2. \*trace impurities.

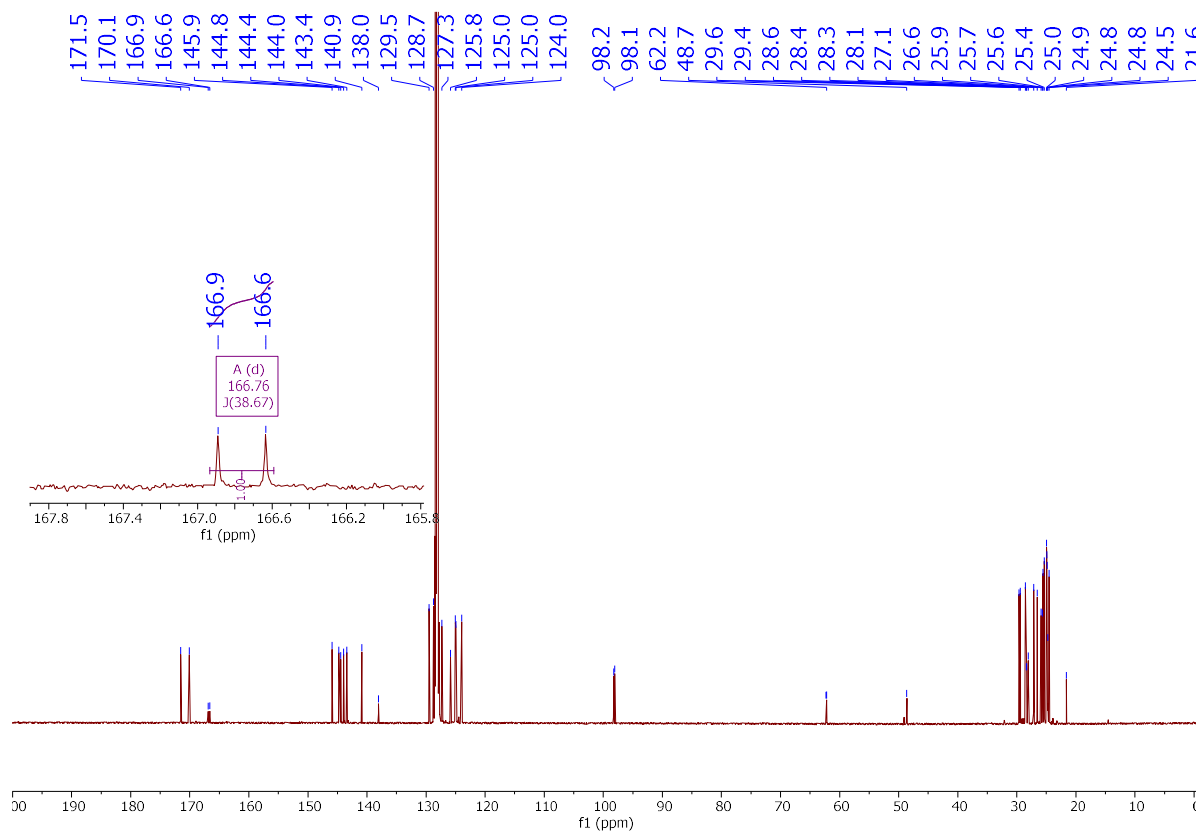

Figure S2. <sup>13</sup>C{<sup>1</sup>H} NMR (151 MHz, C<sub>6</sub>D<sub>6</sub>, 298 K) spectrum of compound 2.

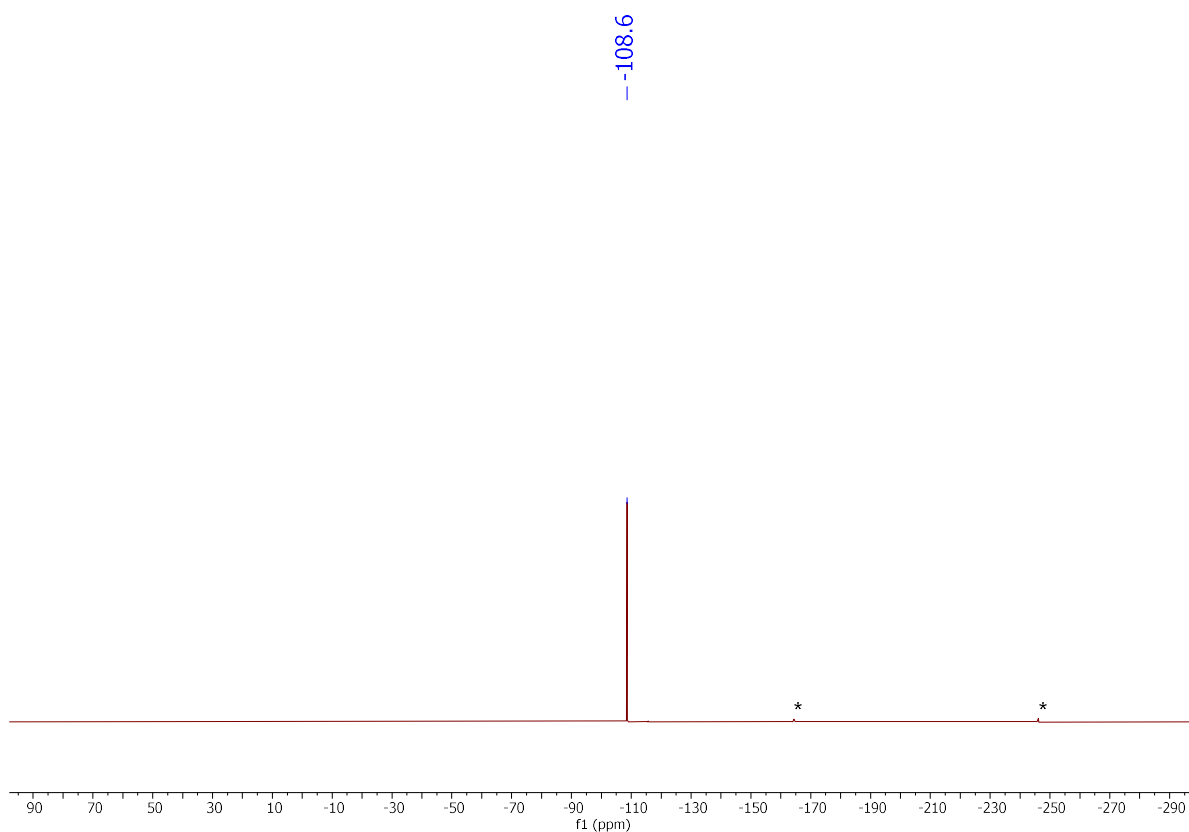

**Figure S3.**  $^{31}\text{P}\{^1\text{H}\}$  NMR (243 MHz,  $\text{C}_6\text{D}_6$ , 298 K) spectrum of compound **2**. \*trace impurities.

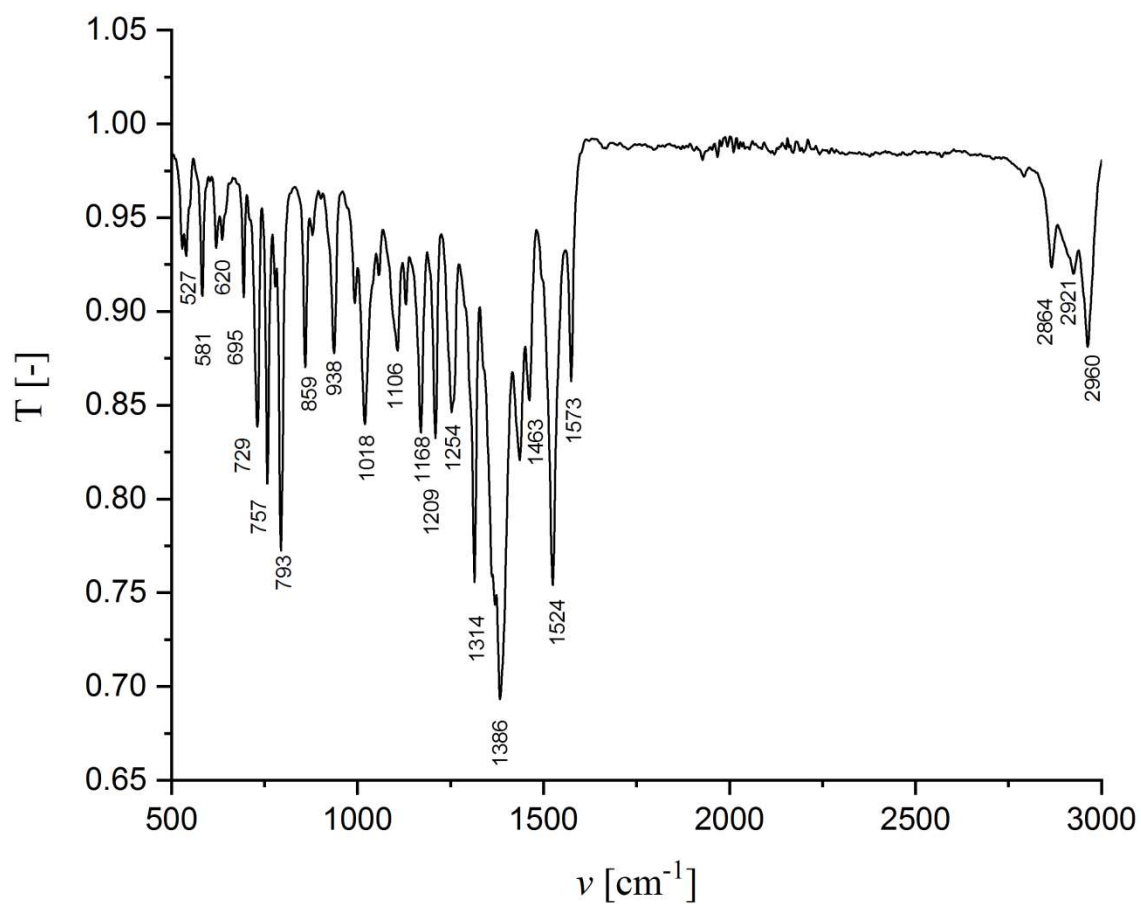

**Figure S4.** ATR-IR spectrum of **2**.

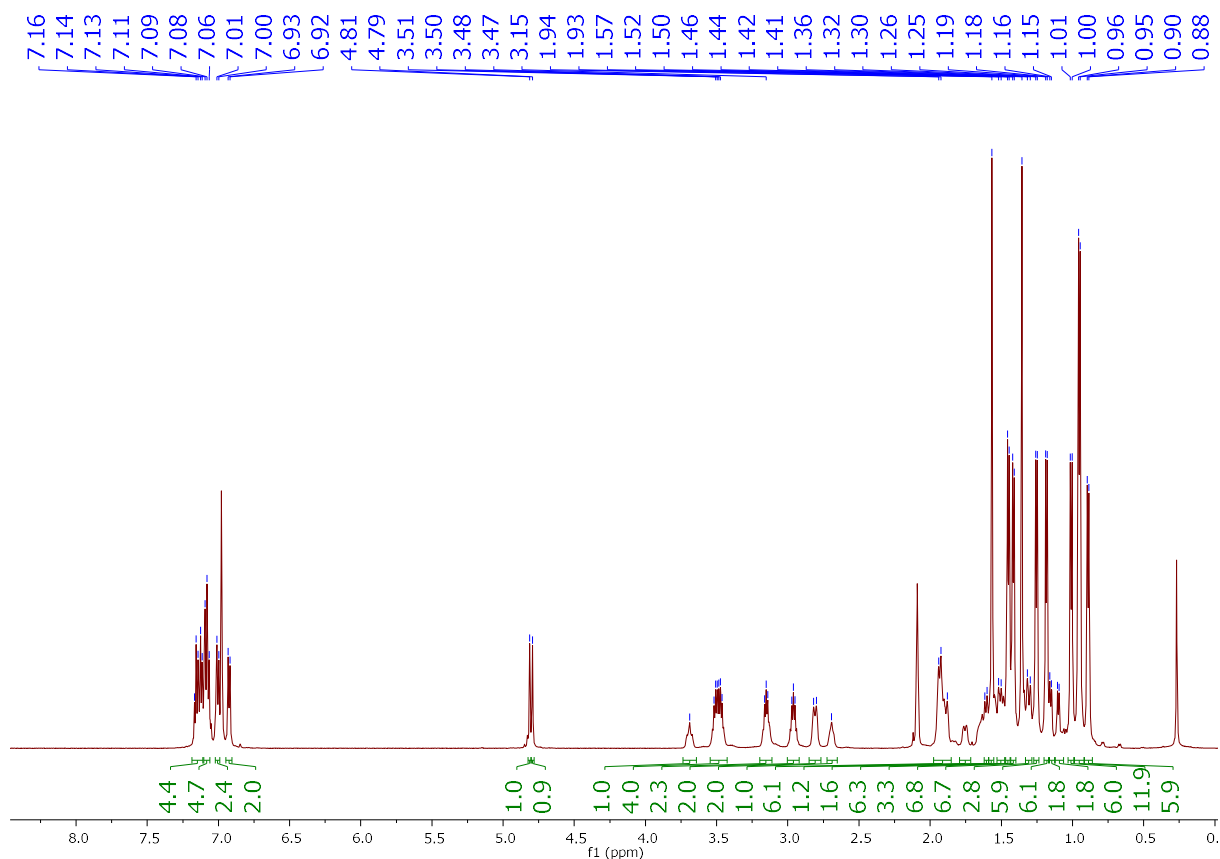

Figure S5.  $^1\text{H}$  NMR (600 MHz, toluene- $d_8$ , 298 K) spectrum of compound **3**.

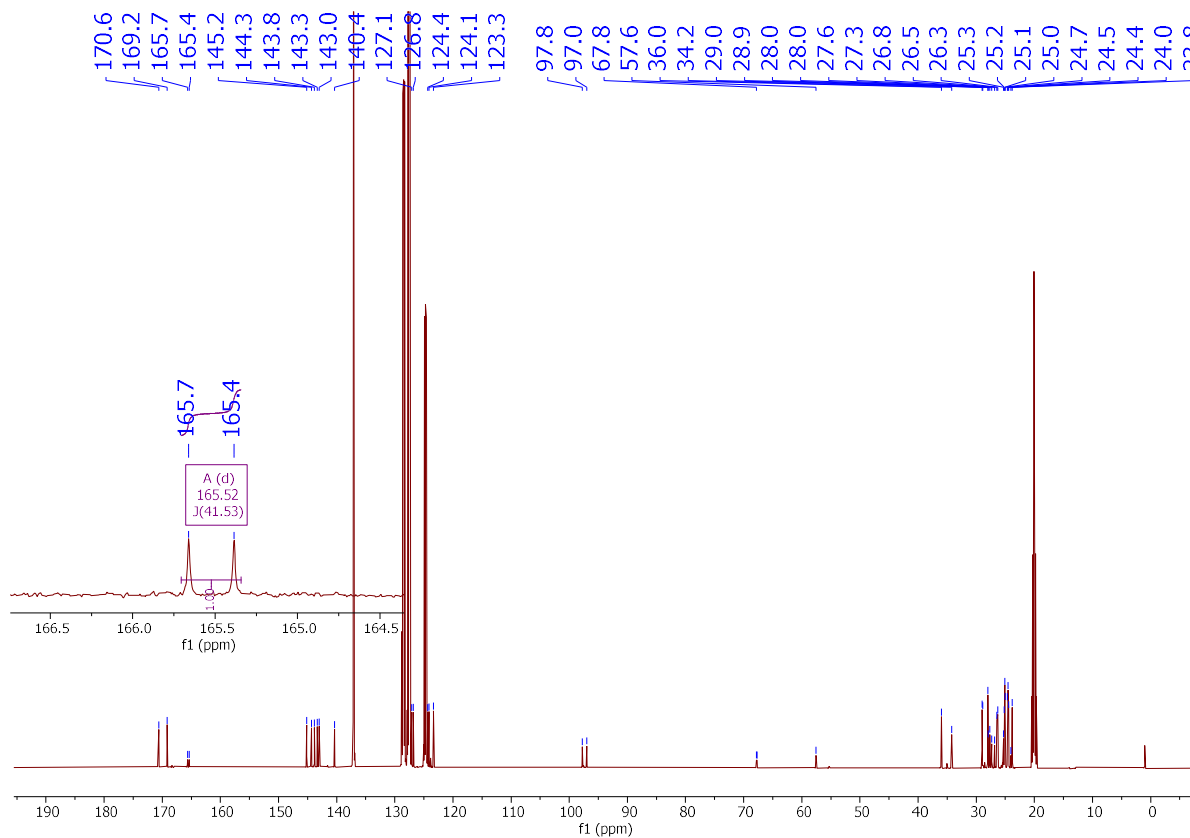

Figure S6.  $^{13}\text{C}\{^1\text{H}\}$  NMR (151 MHz, toluene- $d_8$ , 298 K) spectrum of compound **3**.

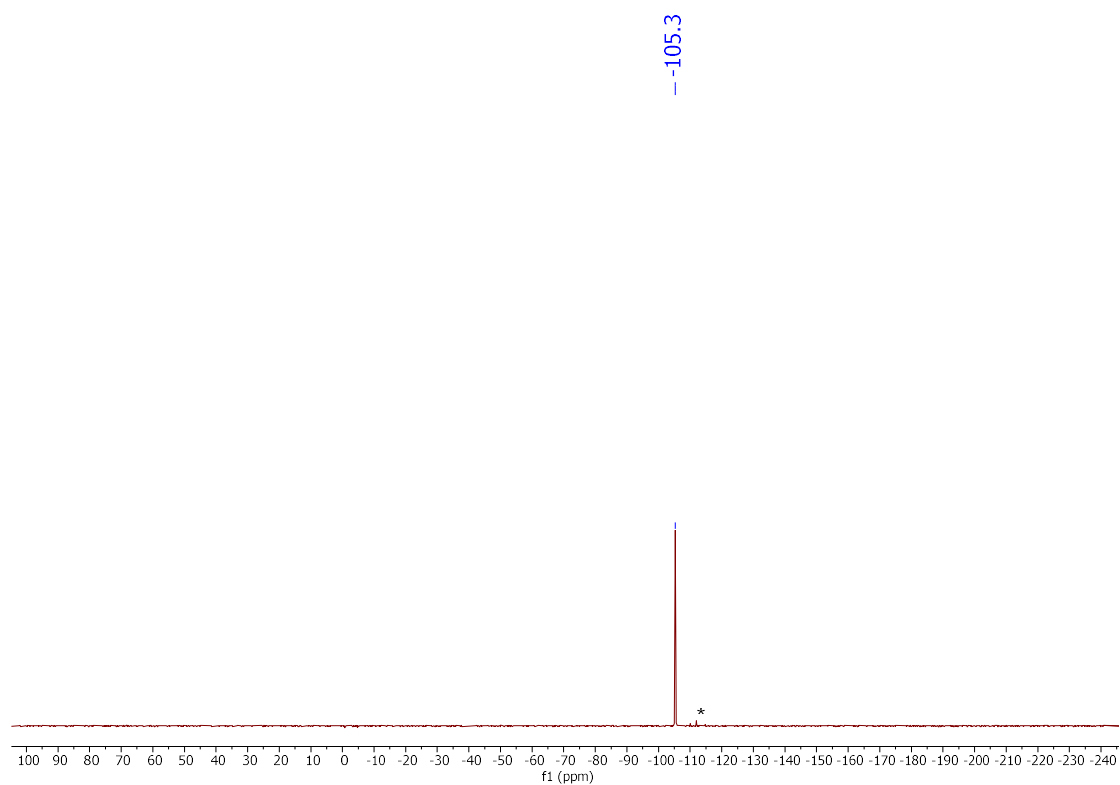

**Figure S7.**  $^{31}\text{P}\{^1\text{H}\}$  NMR (121 MHz, toluene- $d_8$ , 298 K) spectrum of compound **3**. \*trace impurity.

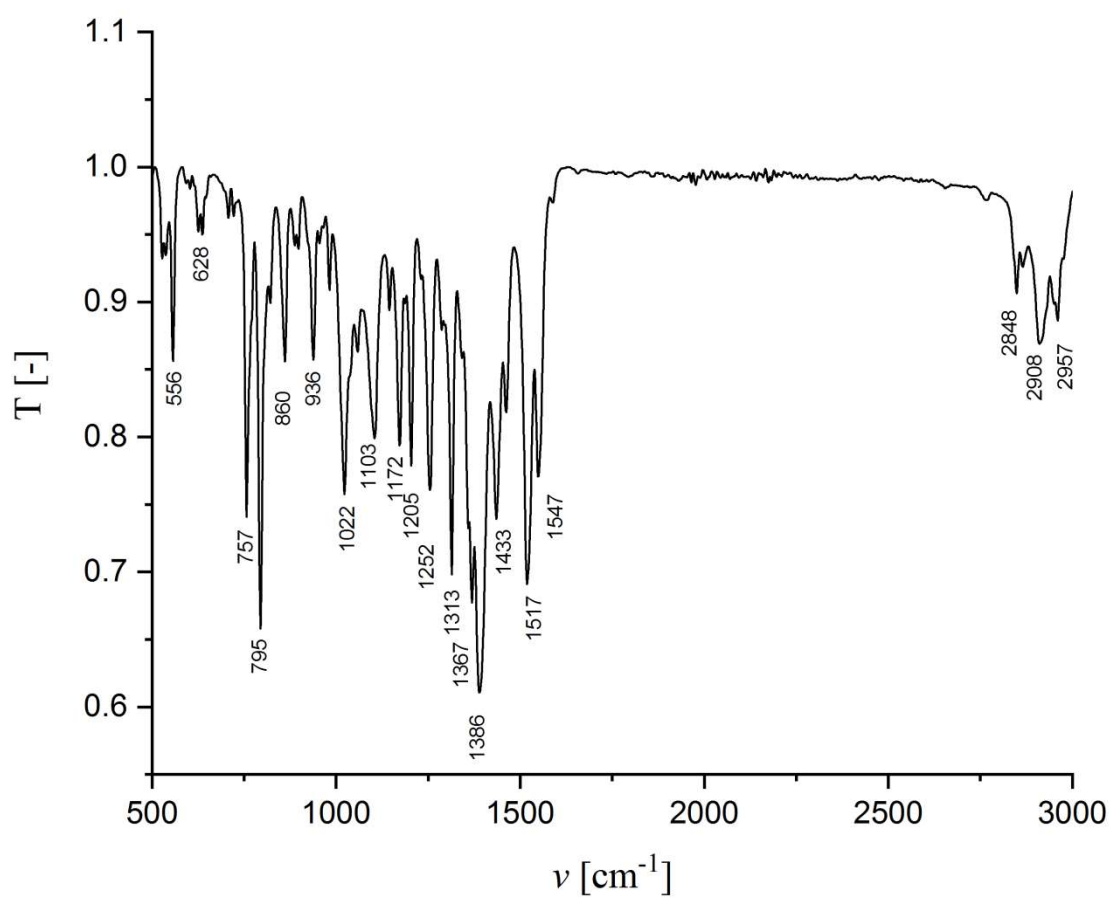

**Figure S8.** ATR-IR spectrum of **3**.

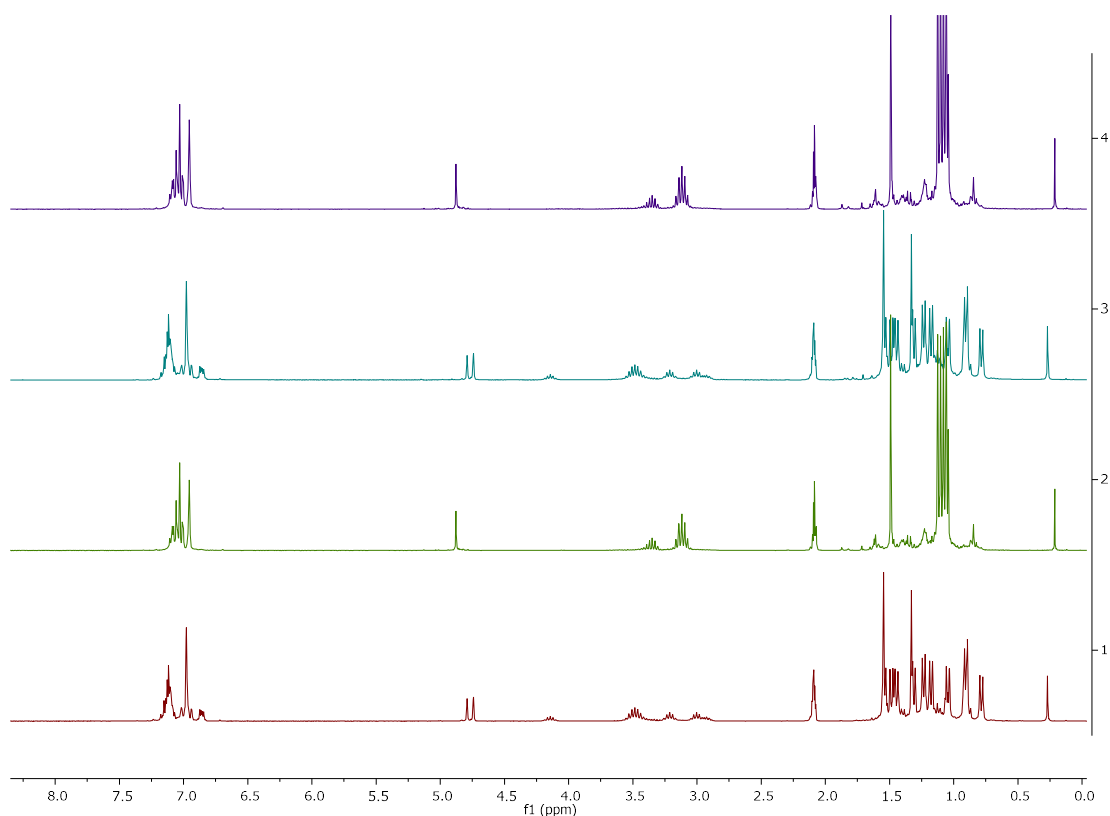

**Figure S9.**  $^1\text{H}$  NMR (300 MHz, toluene- $d_8$ ) spectra of the temperature-dependent reversible reaction of DIC and gallaphosphene **1**; 1) compound **2**; 2) compound **2** after heating at 90 °C; 3) after cooling to ambient temperature; 4) after heating 2<sup>nd</sup> time to 90 °C.

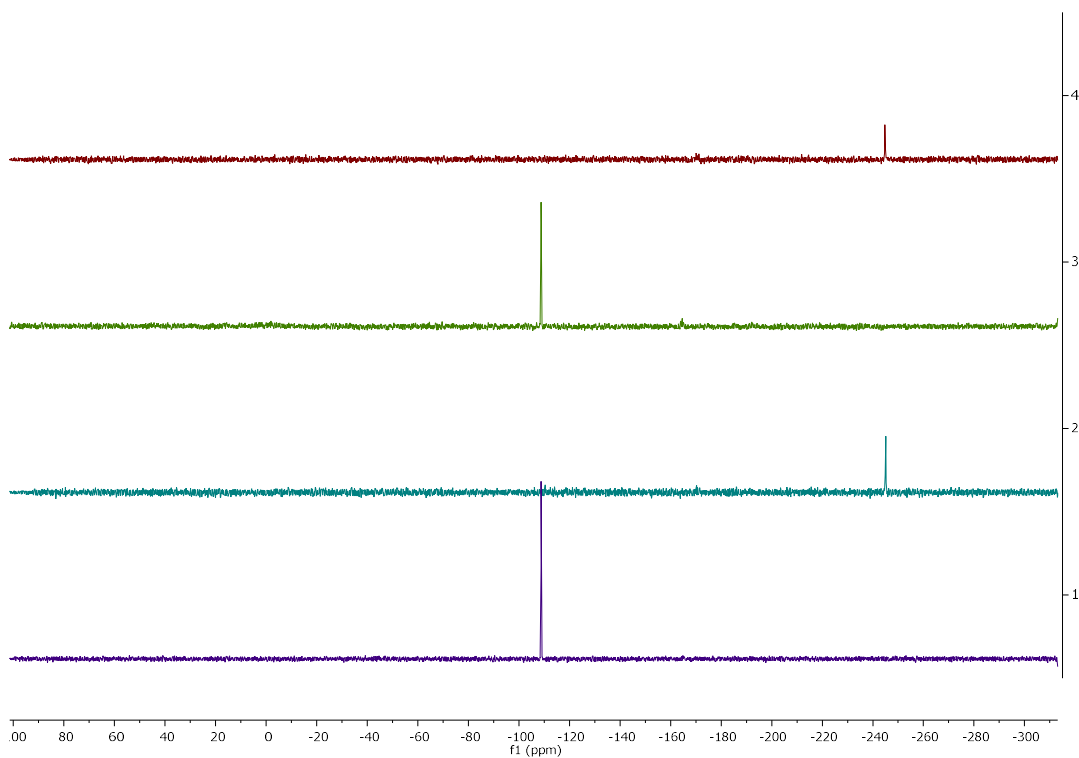

**Figure S10.**  $^{31}\text{P}\{^1\text{H}\}$  NMR (121 MHz, toluene- $d_8$ ) spectra tracking the temperature dependent reversible reaction of DIC and gallaphosphene **1**; 1) compound **2**; 2) compound **2** after heating at 90 °C; 3) after cooling to ambient temperature; 4) after heating 2<sup>nd</sup> time to 90 °C.

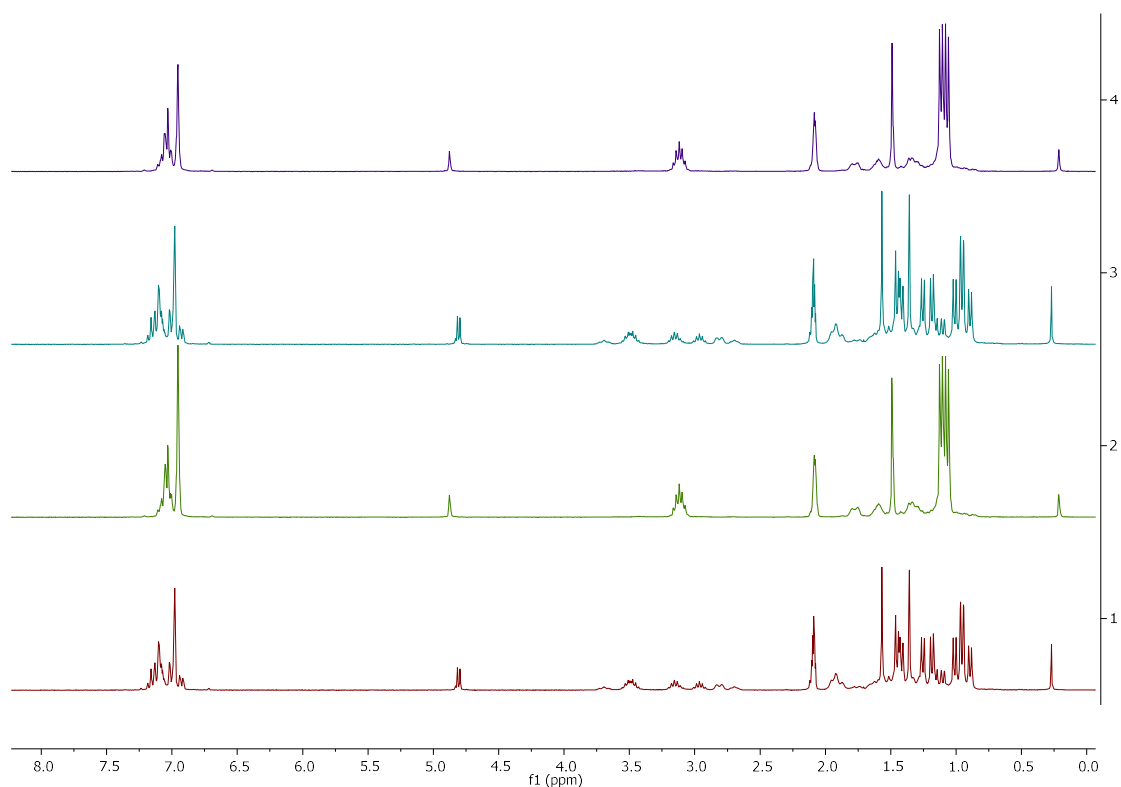

**Figure S11.**  $^1\text{H}$  NMR (300 MHz, toluene- $d_8$ ) spectra of the temperature dependent reversible reaction of DCC and gallaphosphene **1**; 1) compound **3**; 2) compound **3** after heating at 90 °C; 3) after cooling to ambient temperature; 4) after heating 2<sup>nd</sup> time to 90 °C.

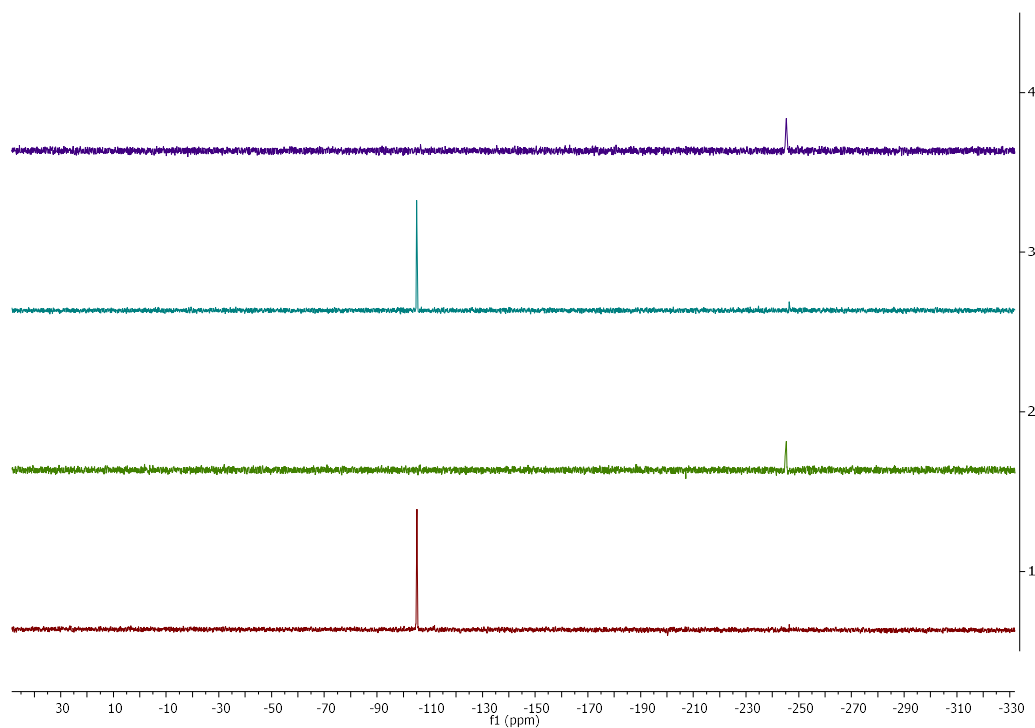

**Figure S12.**  $^{31}\text{P}\{^1\text{H}\}$  NMR (121 MHz, toluene- $d_8$ ) spectra tracking the temperature dependent reversible reaction of DCC and gallaphosphene **1**; 1) compound **3**; 2) compound **3** after heating at 90 °C; 3) after cooling to ambient temperature; 4) after heating 2<sup>nd</sup> time to 90 °C.

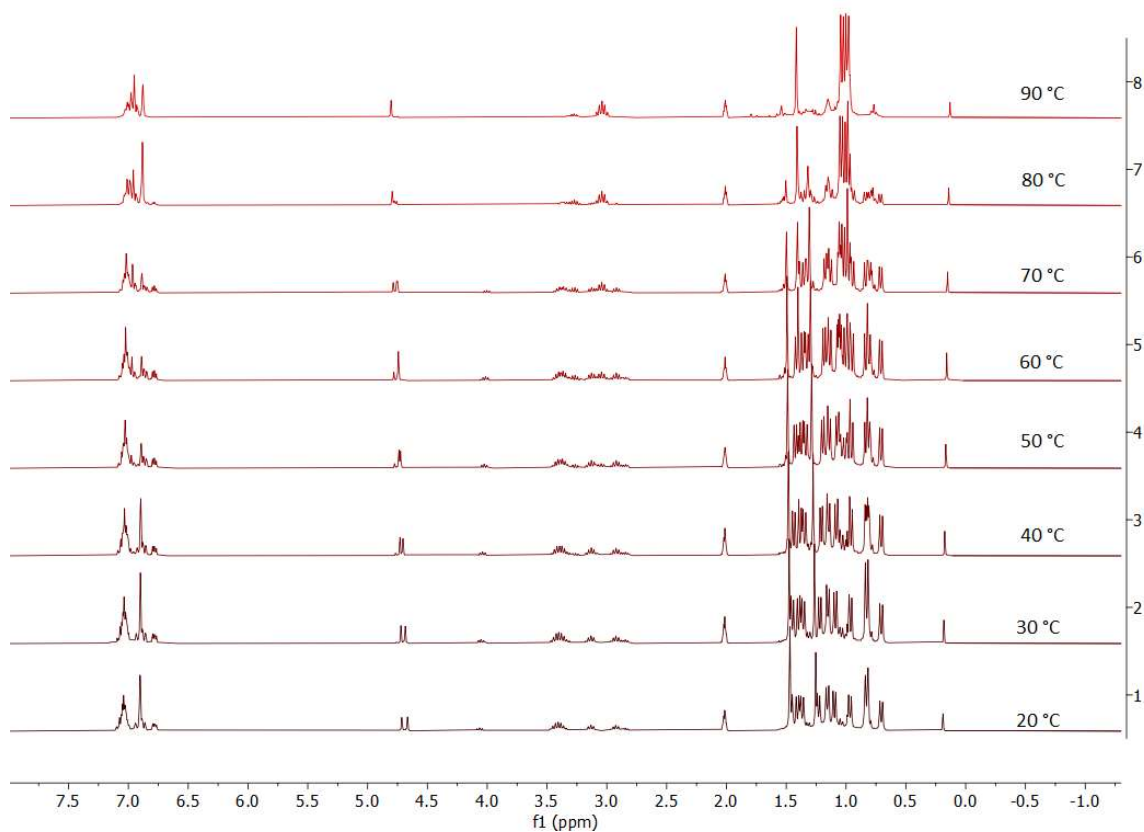

**Figure S13.** Stacked variable temperature (VT)  $^1\text{H}$  NMR (300 MHz, toluene- $d_8$ ) spectra of compound **2**.

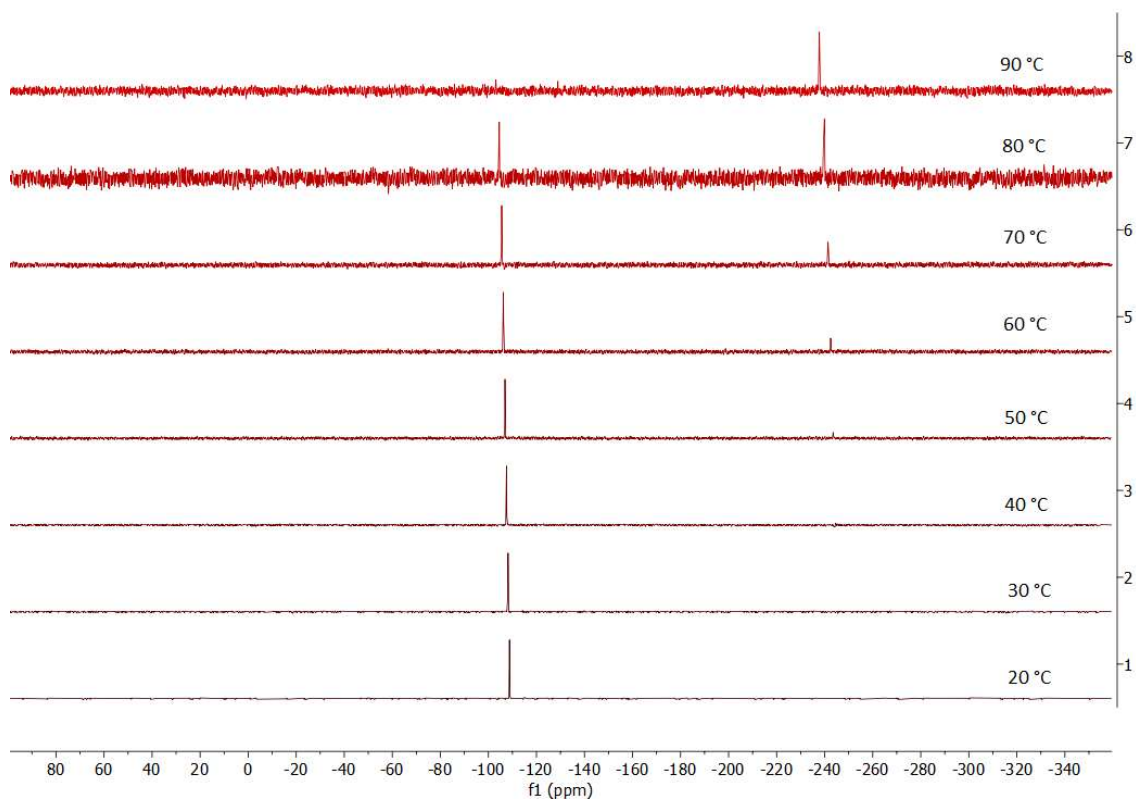

**Figure S14.** Stacked variable temperature (VT)  $^{31}\text{P}$  NMR (121 MHz, toluene- $d_8$ ) spectra of compound **2**.

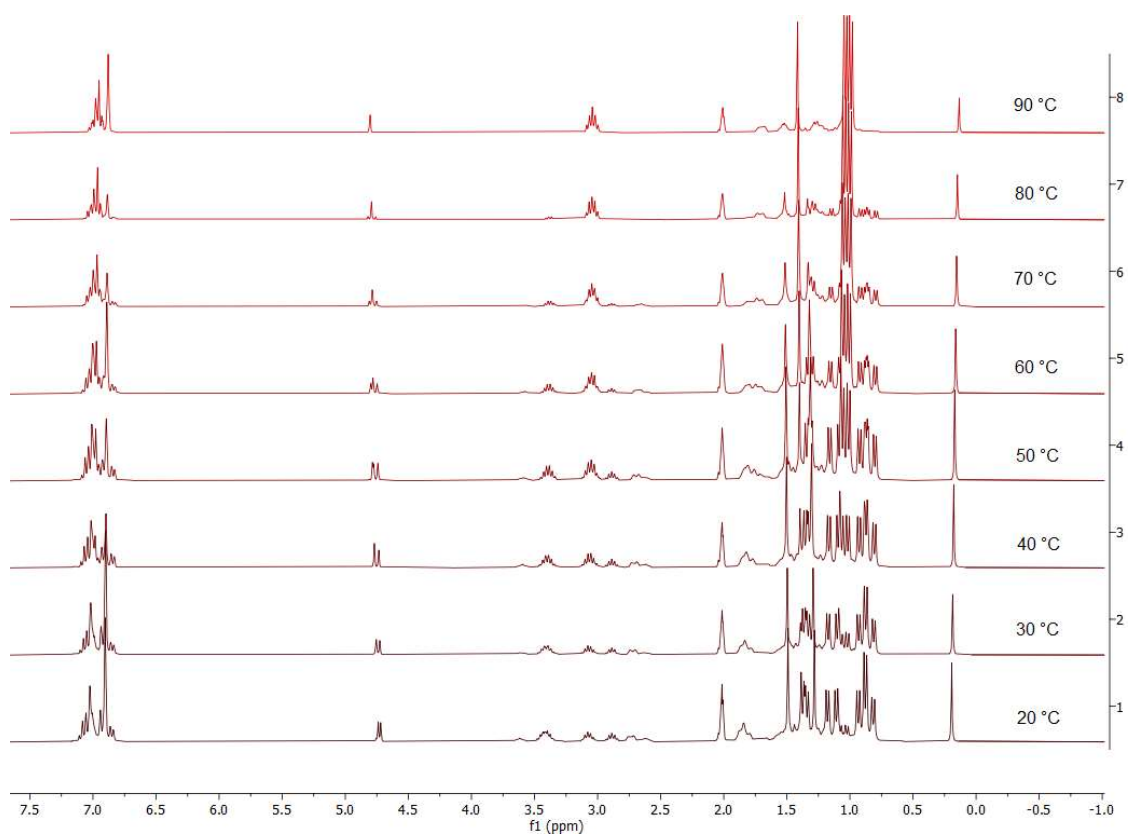

**Figure S15.** Stacked variable temperature (VT)  $^1\text{H}$  NMR (300 MHz, toluene- $d_8$ ) spectra of compound **3**.

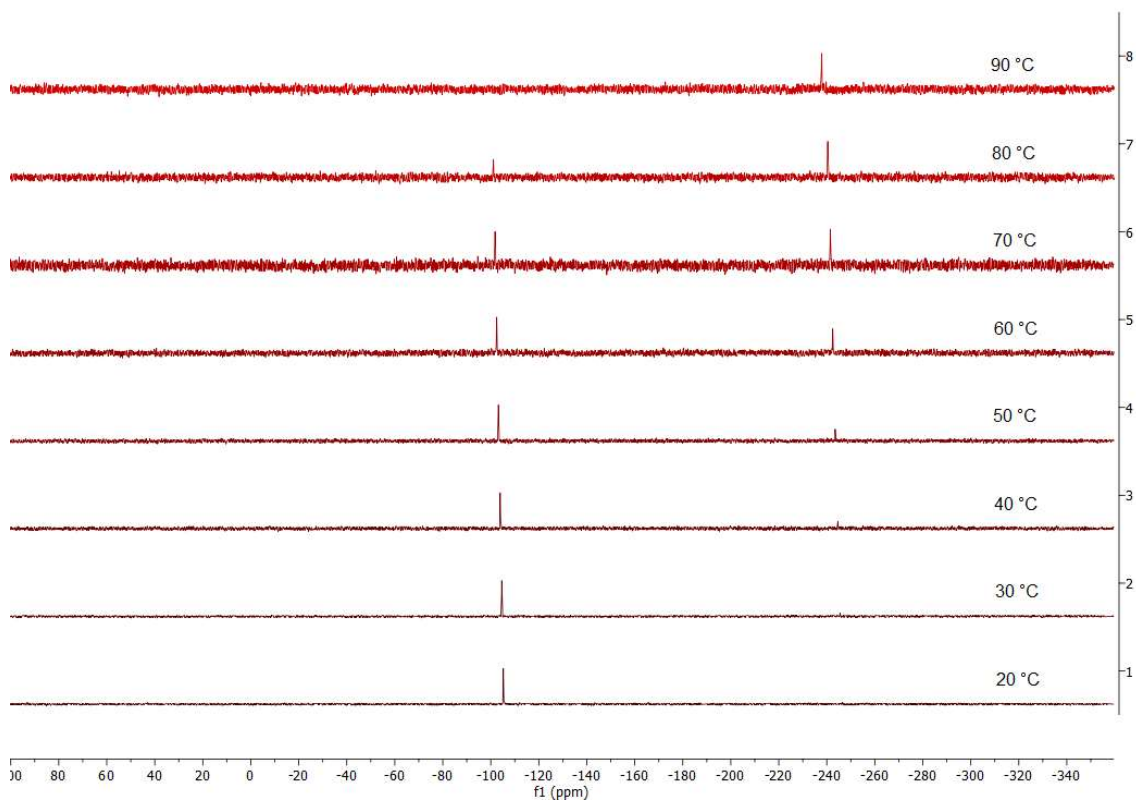

**Figure S16.** Stacked variable temperature (VT)  $^{31}\text{P}$  NMR (121 MHz, toluene- $d_8$ ) spectra of compound **3**.



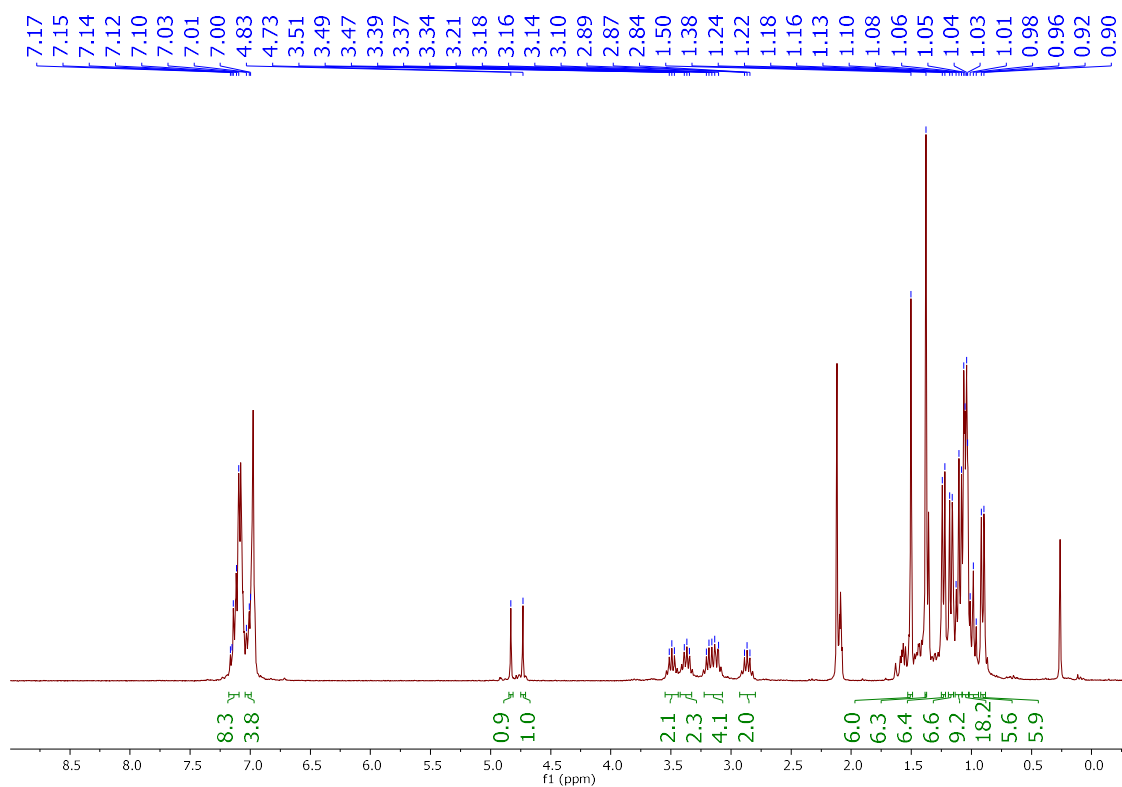

Figure S17.  $^1\text{H}$  NMR (600 MHz, toluene- $d_8$ , 298 K) spectrum of compound 4.

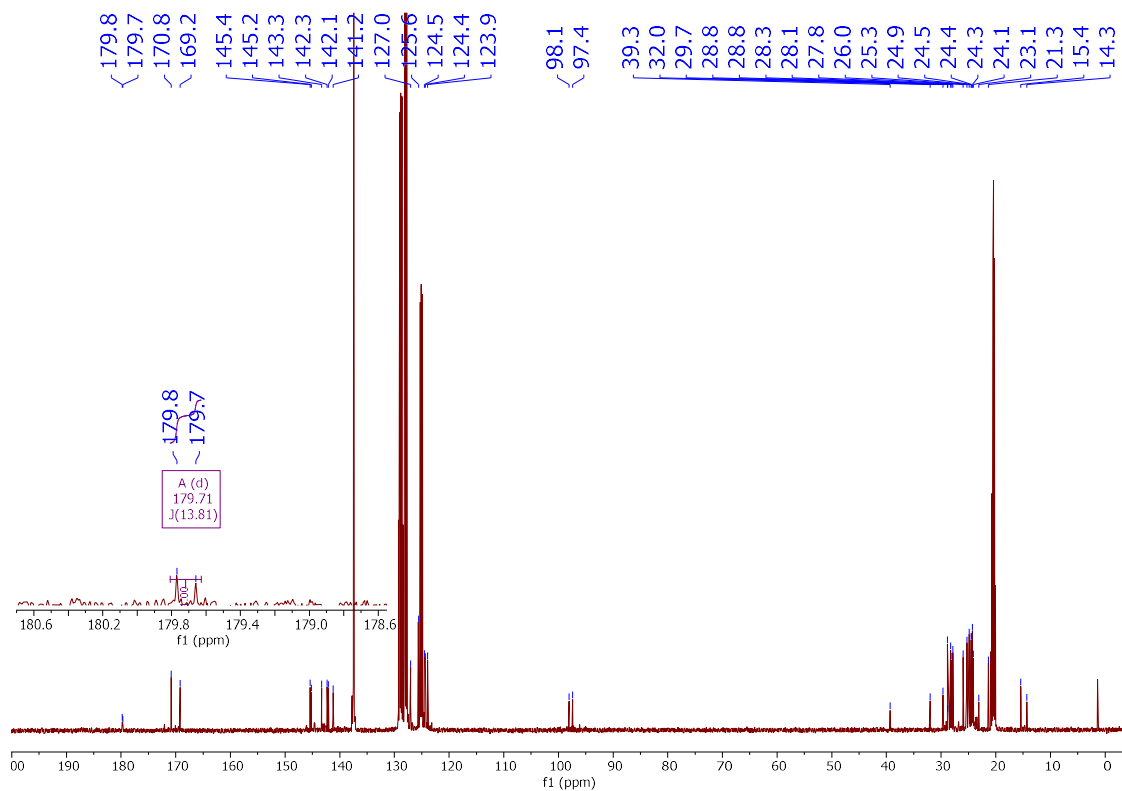

Figure S18.  $^{13}\text{C}\{^1\text{H}\}$  NMR (151 MHz, toluene- $d_8$ , 298 K) spectrum of compound 4.

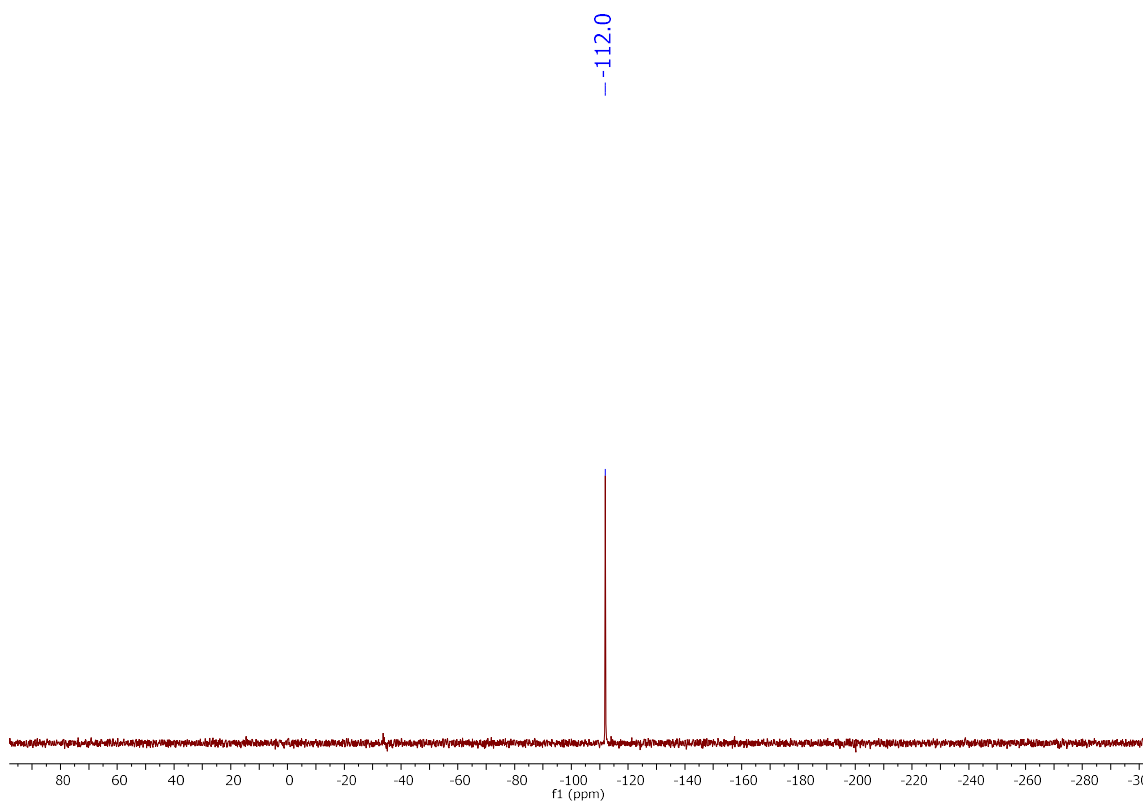

**Figure S19.**  $^{31}\text{P}\{^1\text{H}\}$  NMR (121 MHz,  $\text{C}_6\text{D}_6$ , 298 K) spectrum of compound **4**.

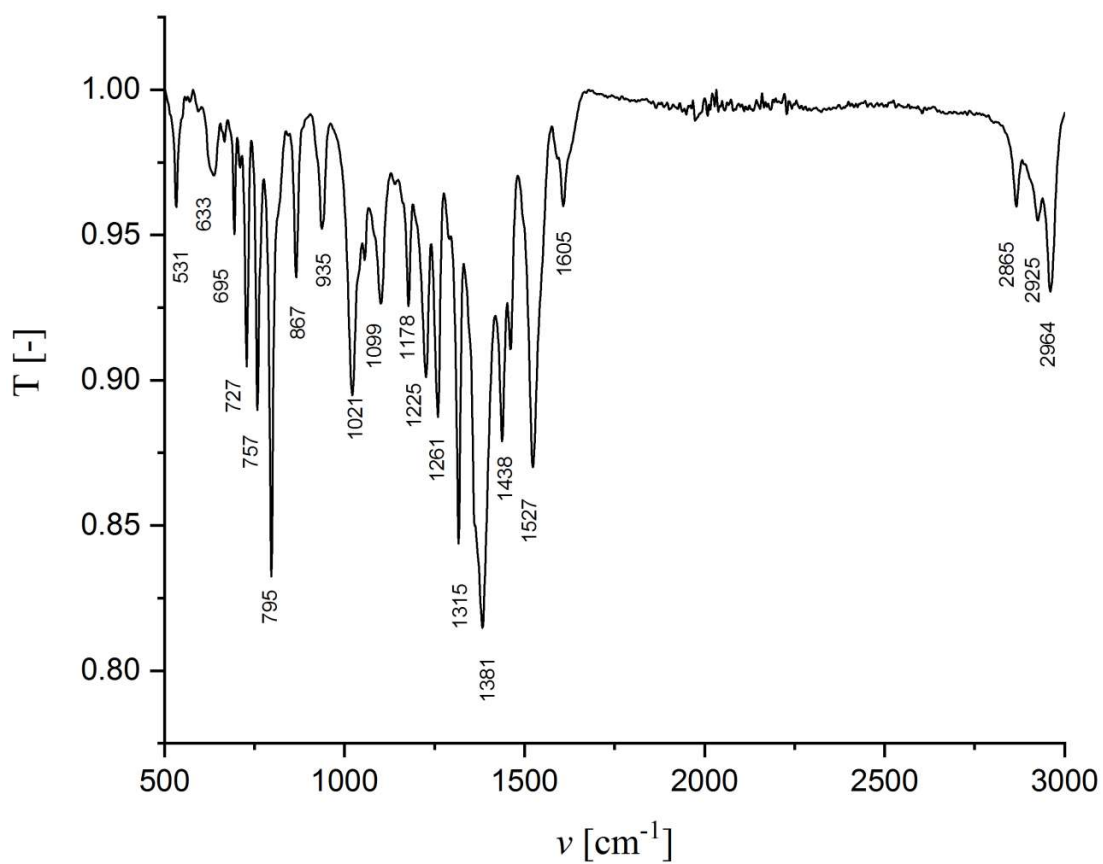

**Figure S20.** ATR-IR spectrum of **4**.

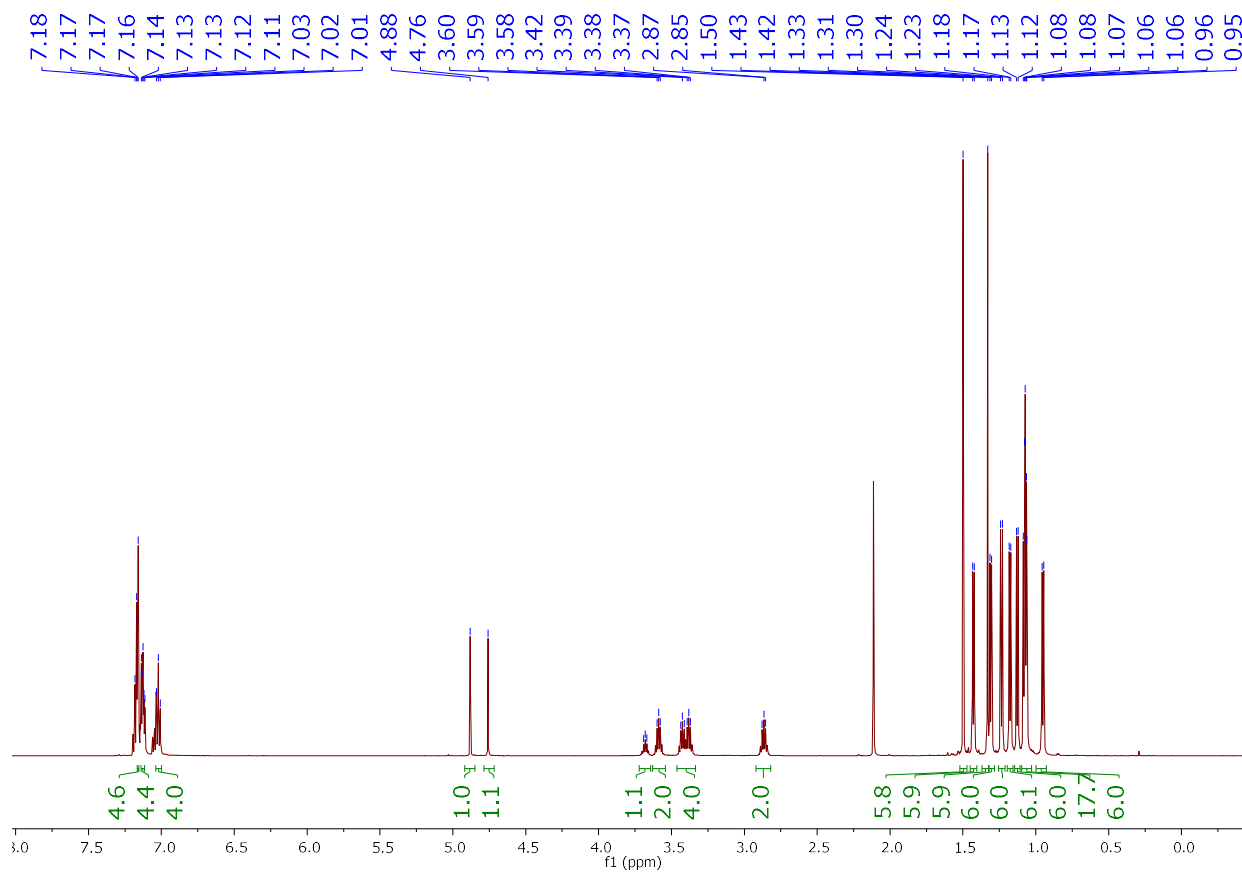

Figure S21.  $^1\text{H}$  NMR (600 MHz,  $\text{C}_6\text{D}_6$ , 298 K) spectrum of compound **5**.

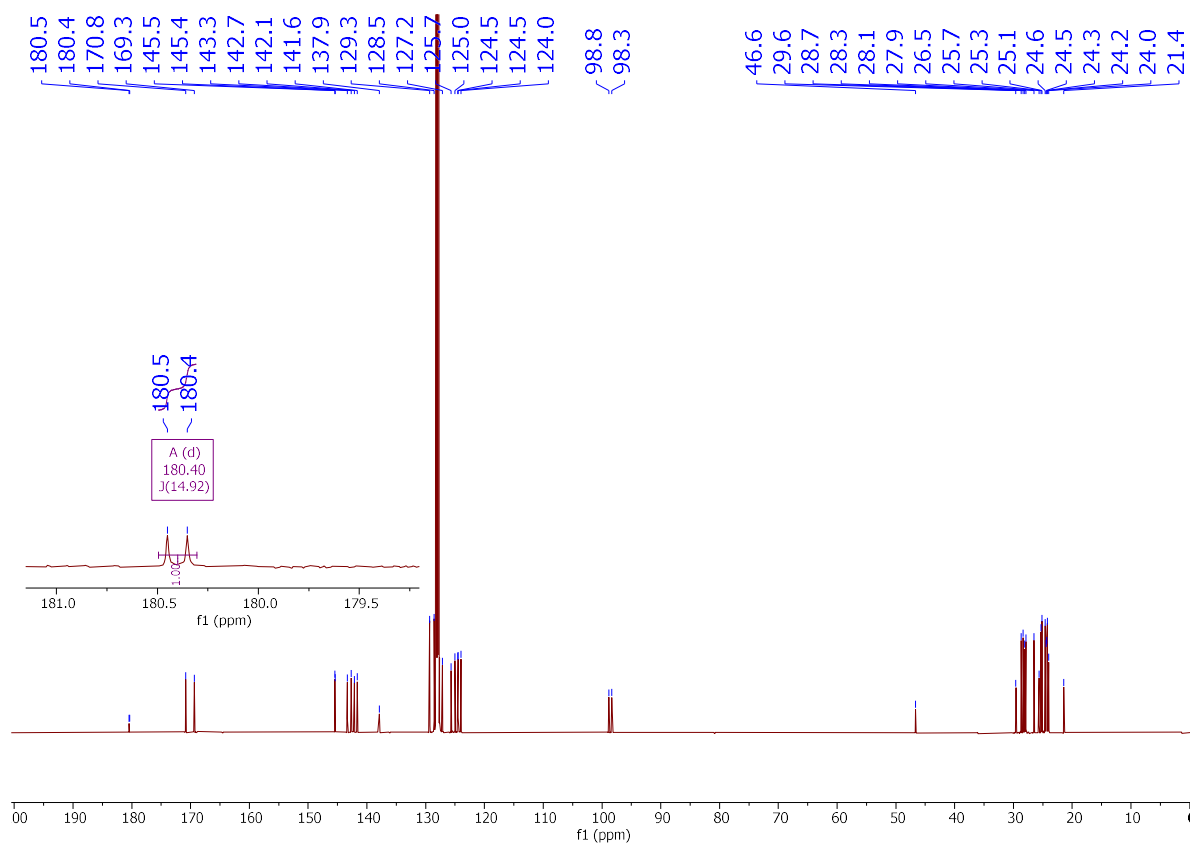

Figure S22.  $^{13}\text{C}\{^1\text{H}\}$  NMR (151 MHz,  $\text{C}_6\text{D}_6$ , 298 K) spectrum of compound **5**.

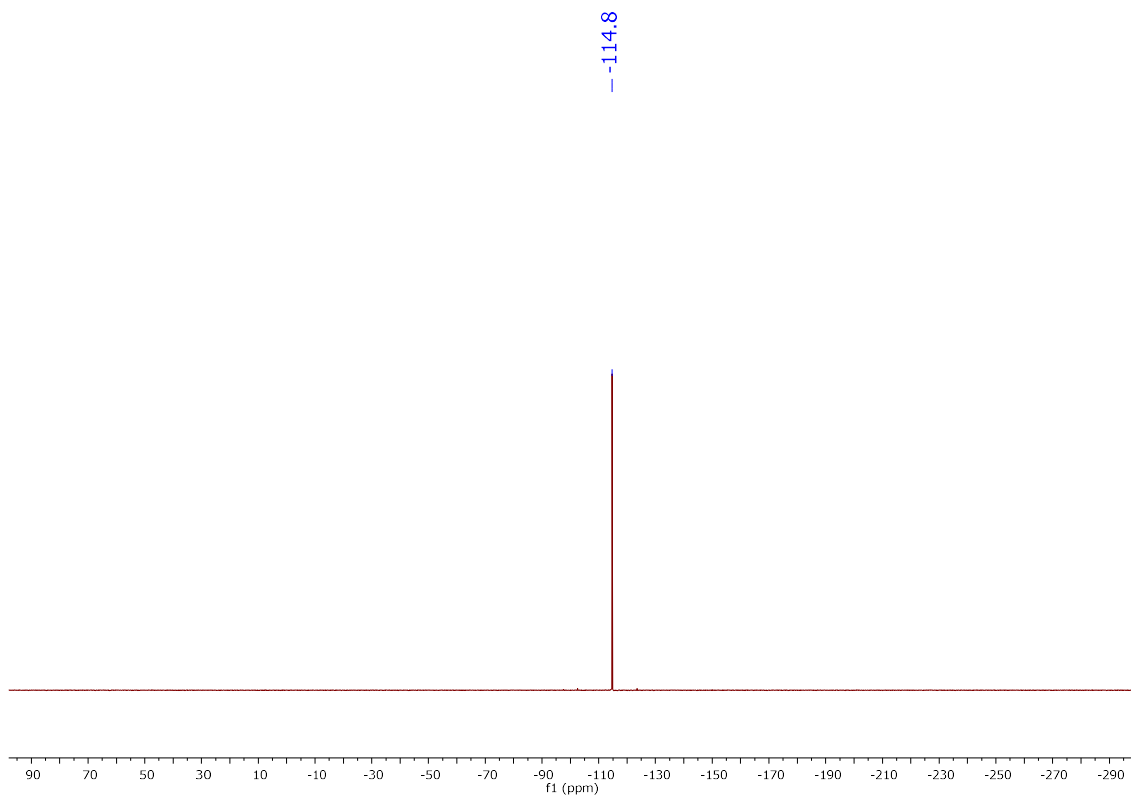

**Figure S23.**  $^{31}\text{P}\{^1\text{H}\}$  NMR (243 MHz,  $\text{C}_6\text{D}_6$ , 298 K) spectrum of compound **5**.

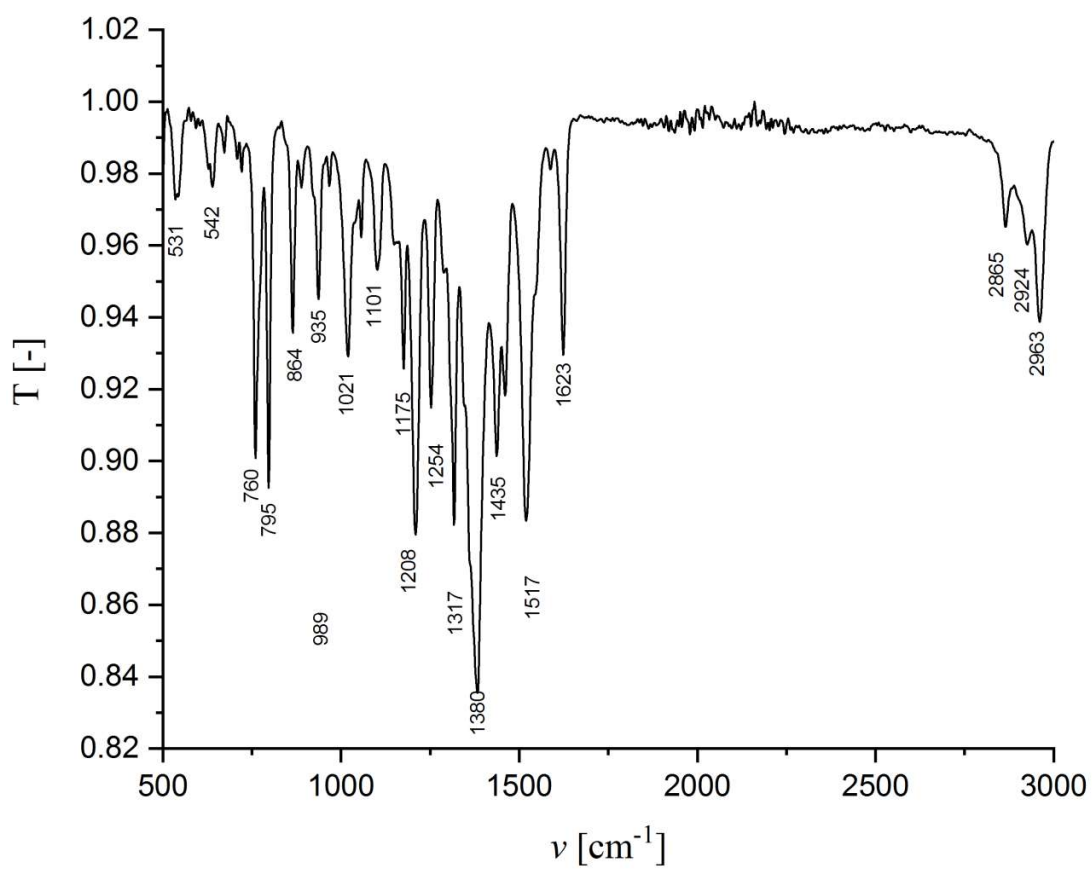

**Figure S24.** ATR-IR spectrum of **5**.

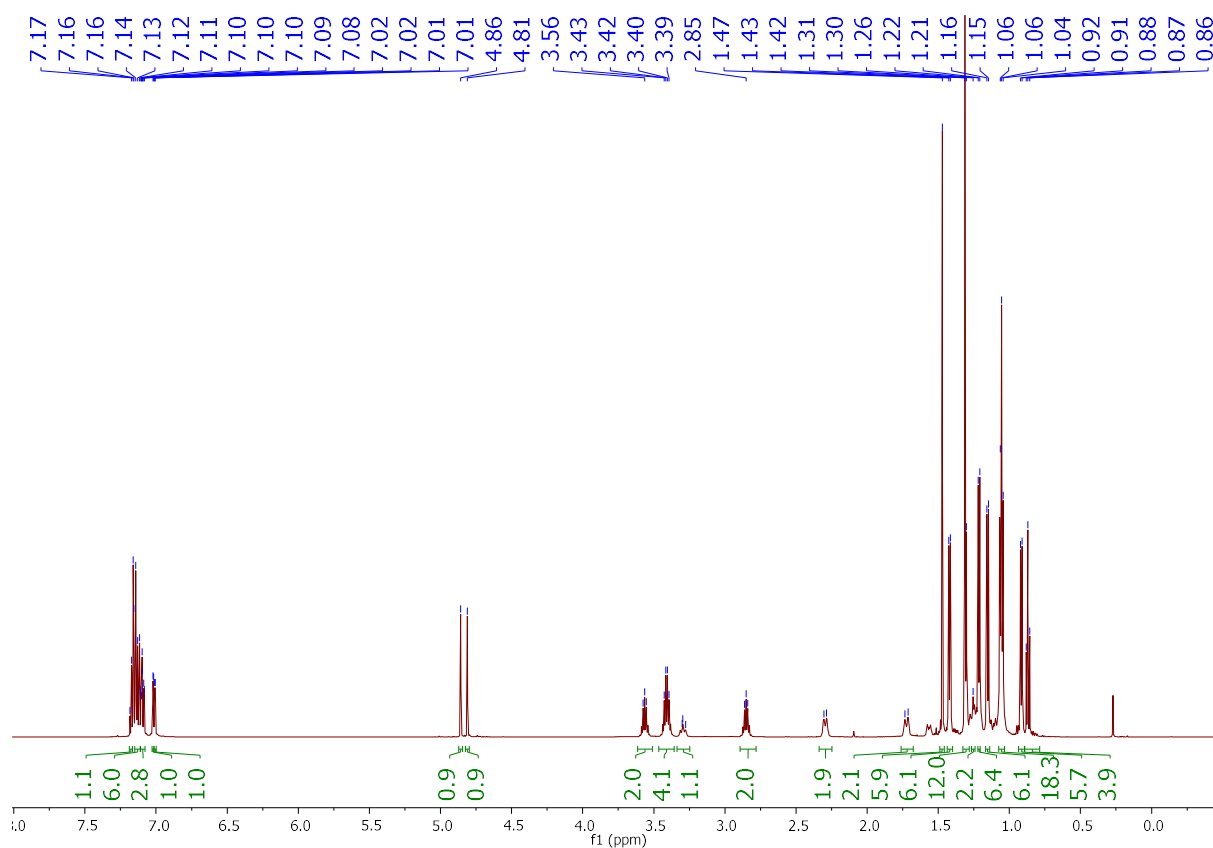

Figure S25.  $^1\text{H}$  NMR (600 MHz,  $\text{C}_6\text{D}_6$ , 298 K) spectrum of compound **6**.

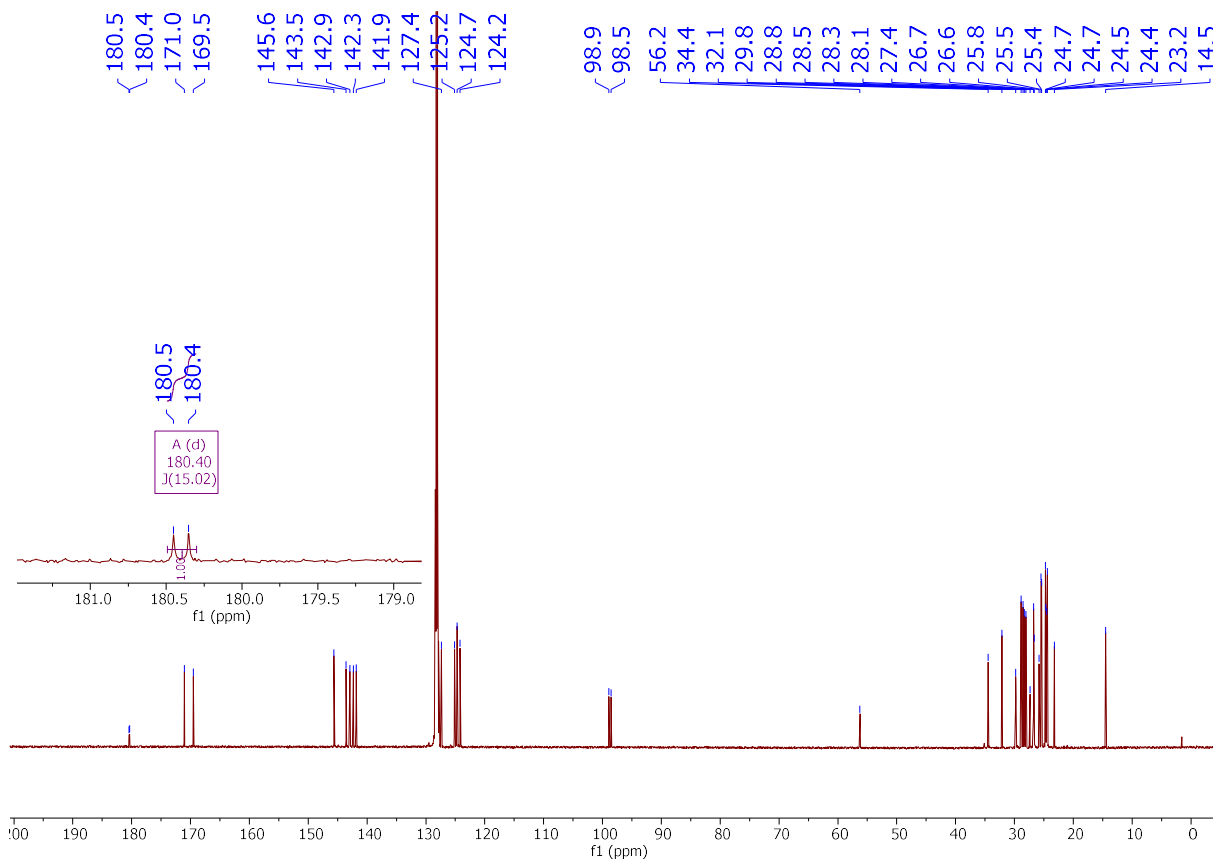

Figure S26.  $^{13}\text{C}\{^1\text{H}\}$  NMR (151 MHz,  $\text{C}_6\text{D}_6$ , 298 K) spectrum of compound **6**.

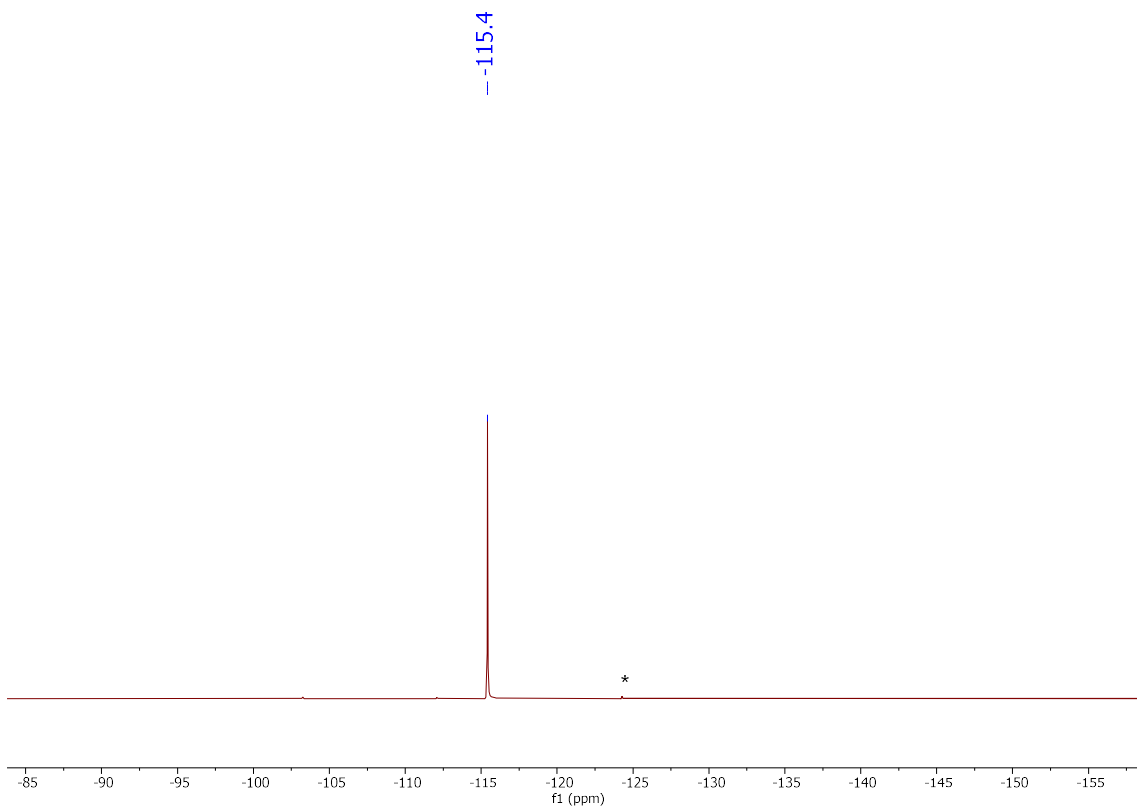

**Figure S27.**  $^{31}\text{P}\{^1\text{H}\}$  NMR (243 MHz,  $\text{C}_6\text{D}_6$ , 298 K) spectrum of compound **6**. \*trace impurity.

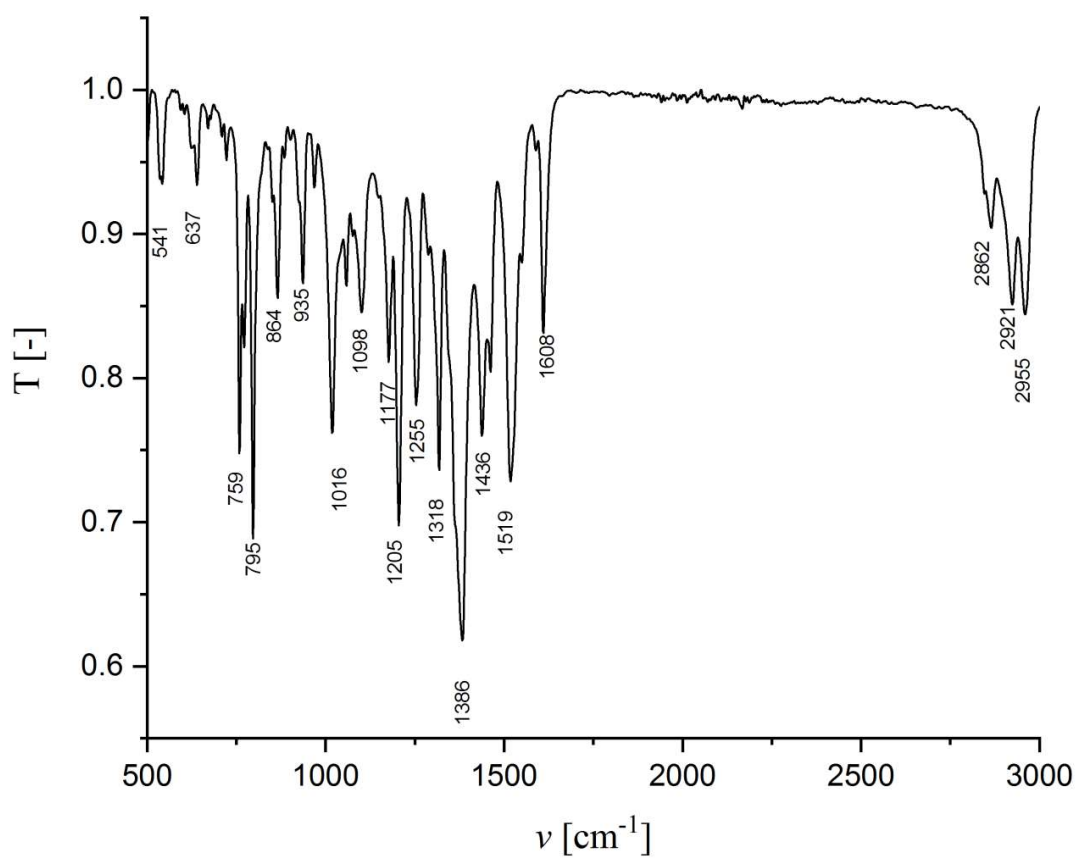

**Figure S28.** ATR-IR spectrum of **6**.

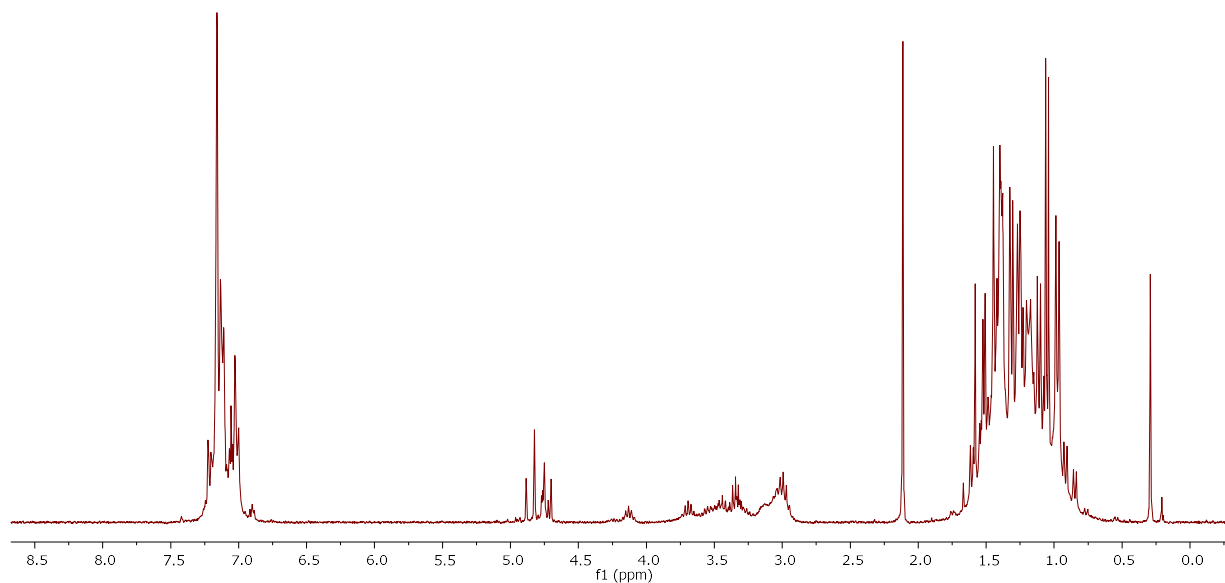

**Figure S29.**  $^1\text{H}$  NMR (300 MHz, toluene- $d_8$ , 298 K) spectrum of reaction of **2** with  $\text{CO}_2$ .

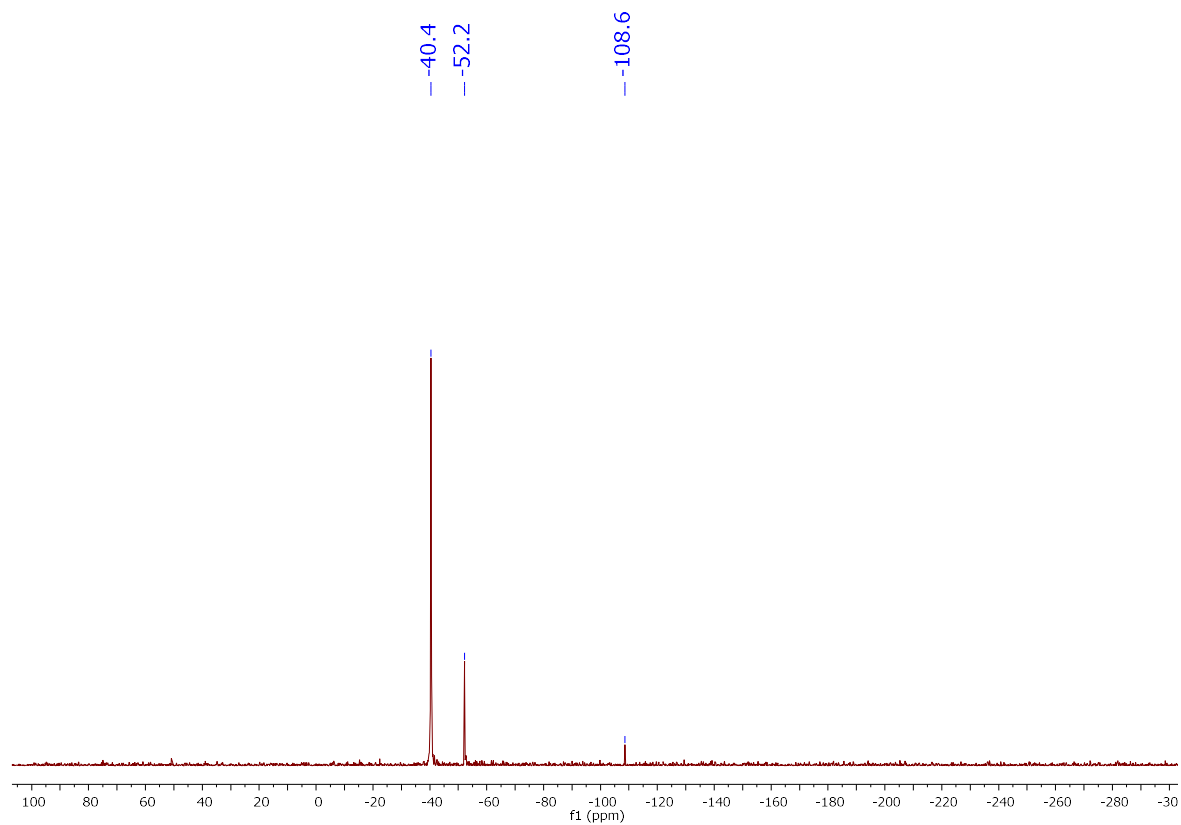

**Figure S30.**  $^{31}\text{P}\{^1\text{H}\}$  NMR (121 MHz, toluene- $d_8$ , 298 K) spectrum of reaction of **2** with  $\text{CO}_2$ .

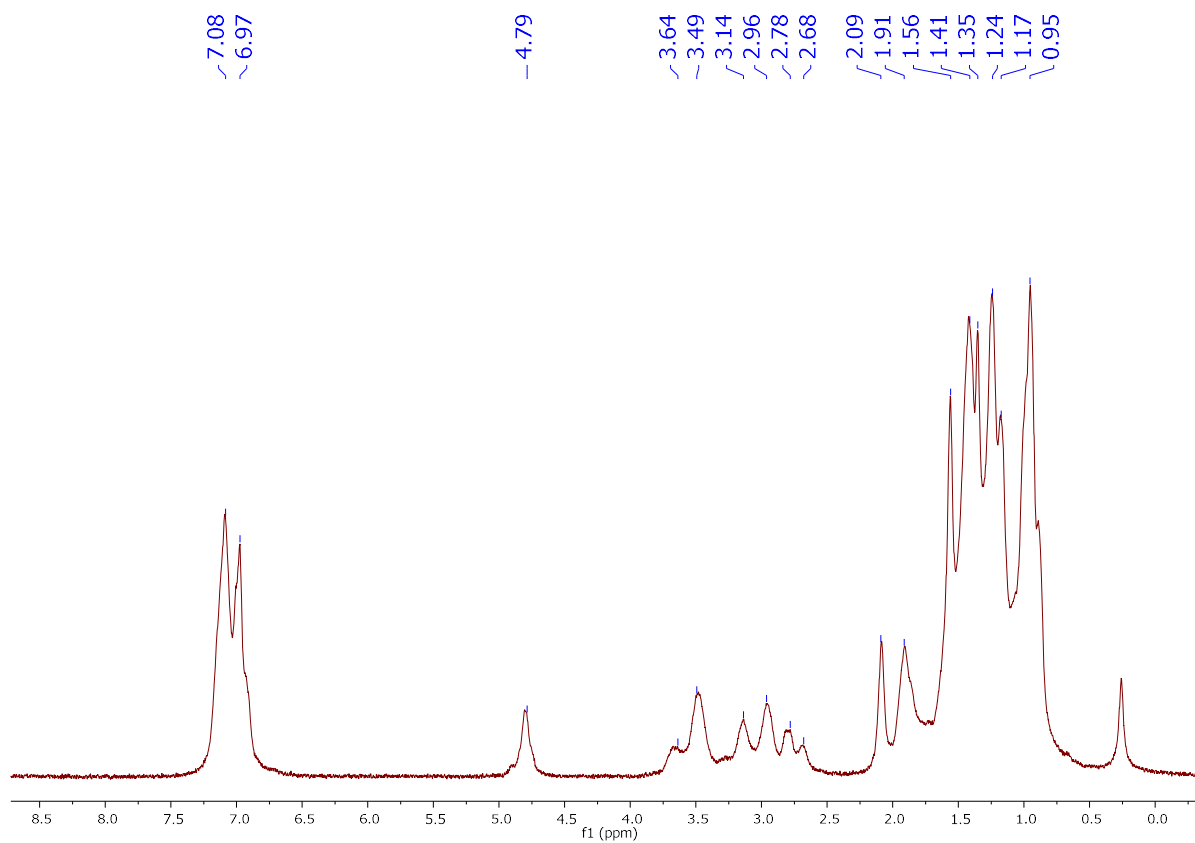

**Figure S31.**  $^1\text{H}$  NMR (300 MHz, toluene- $d_8$ , 298 K) spectrum of reaction of **3** with  $\text{CO}_2$ .

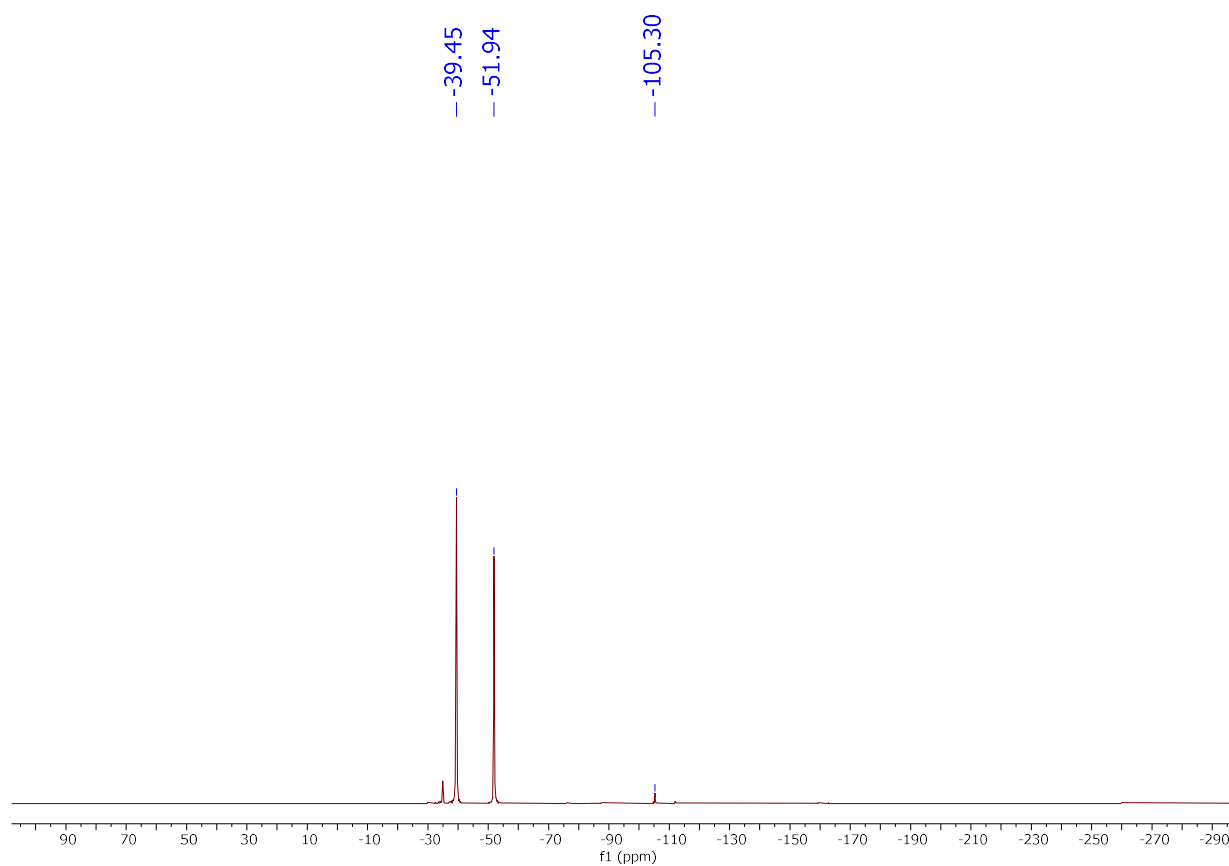

**Figure S32.**  $^{31}\text{P}\{^1\text{H}\}$  NMR (121 MHz, toluene- $d_8$ , 298 K) spectrum of reaction of **3** with  $\text{CO}_2$ .



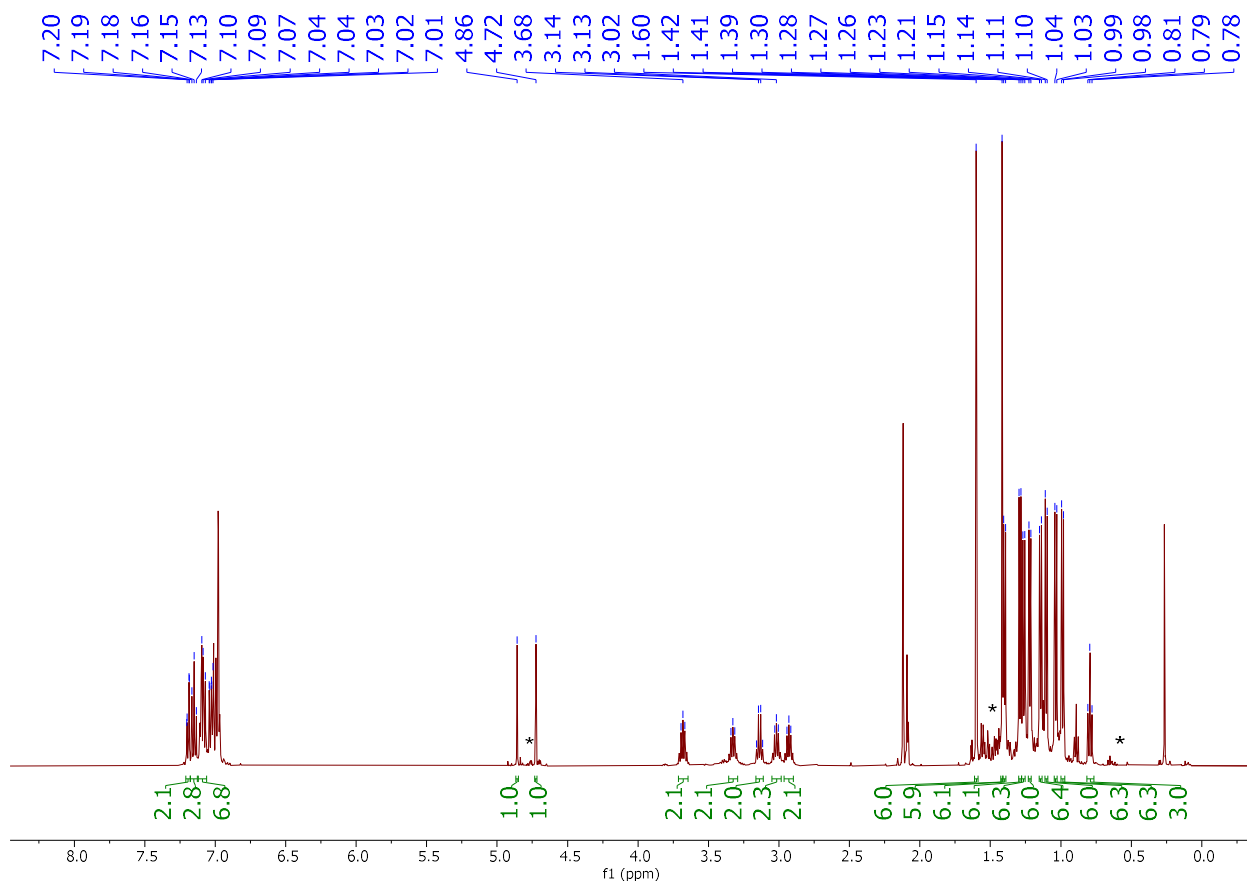

Figure S33.  $^1\text{H}$  NMR (500 MHz, toluene- $d_8$ , 298 K) spectrum of compound 7. \*trace impurities.

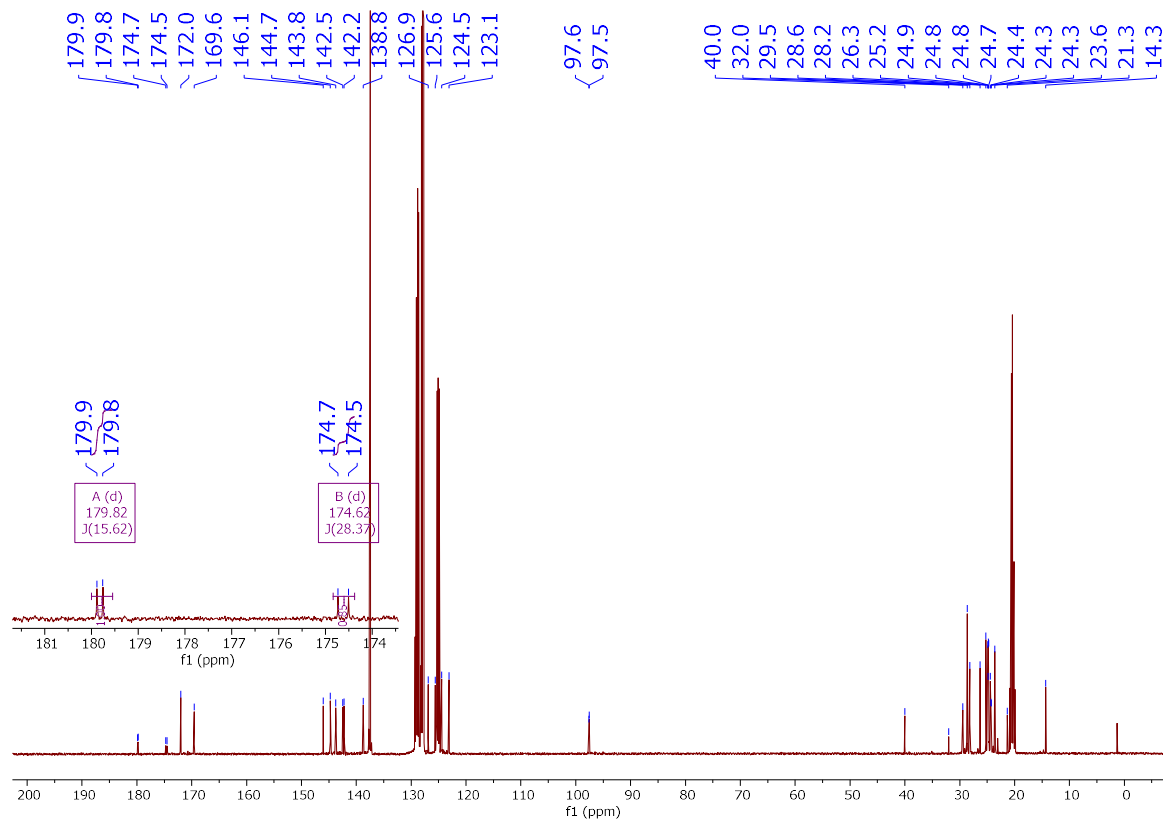

Figure S34.  $^{13}\text{C}\{^1\text{H}\}$  NMR (126 MHz, toluene- $d_8$ , 298 K) spectrum of compound 7.

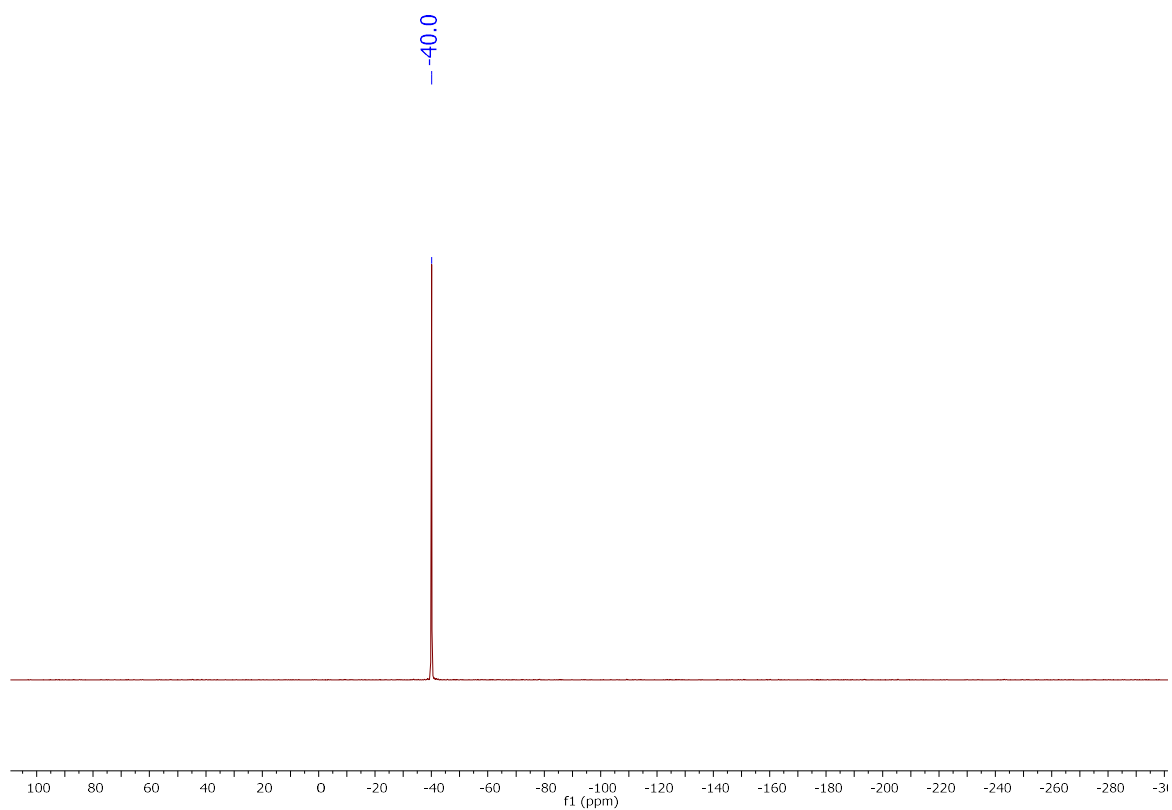

**Figure S35.**  $^{31}\text{P}\{^1\text{H}\}$  NMR (121 MHz,  $\text{C}_6\text{D}_6$ , 298 K) spectrum of compound **7**.

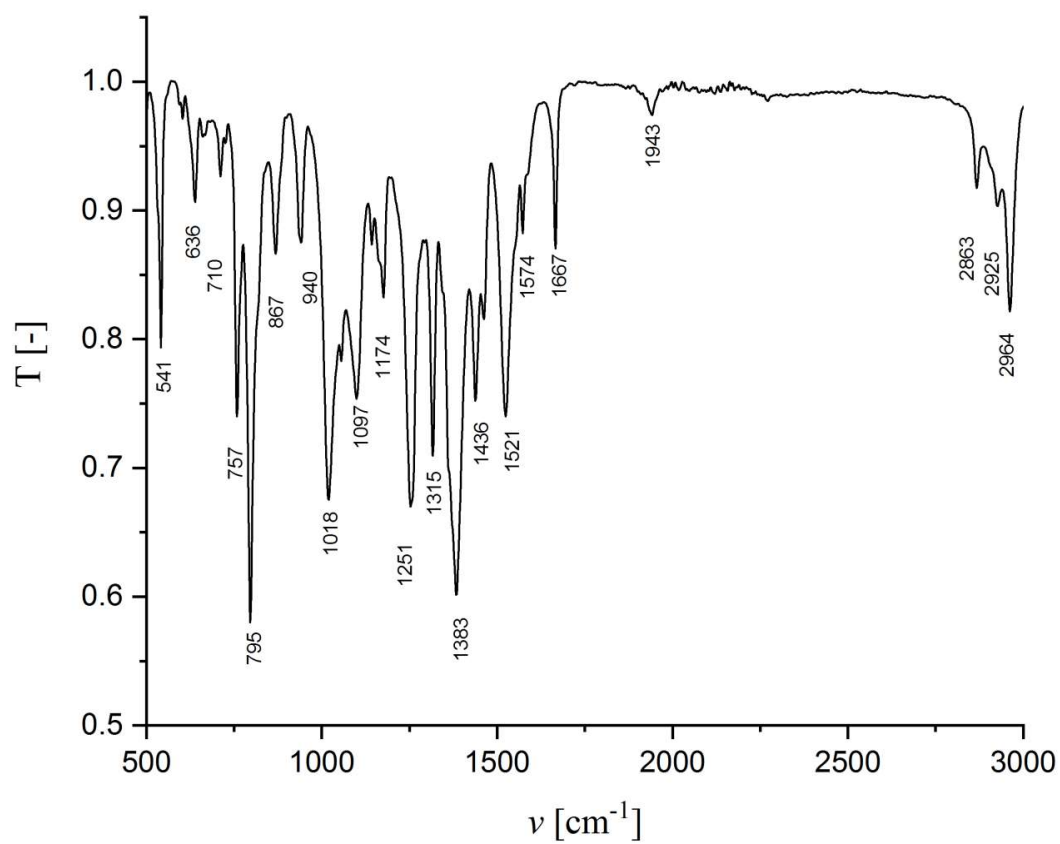

**Figure S36.** ATR-IR spectrum of **7**.

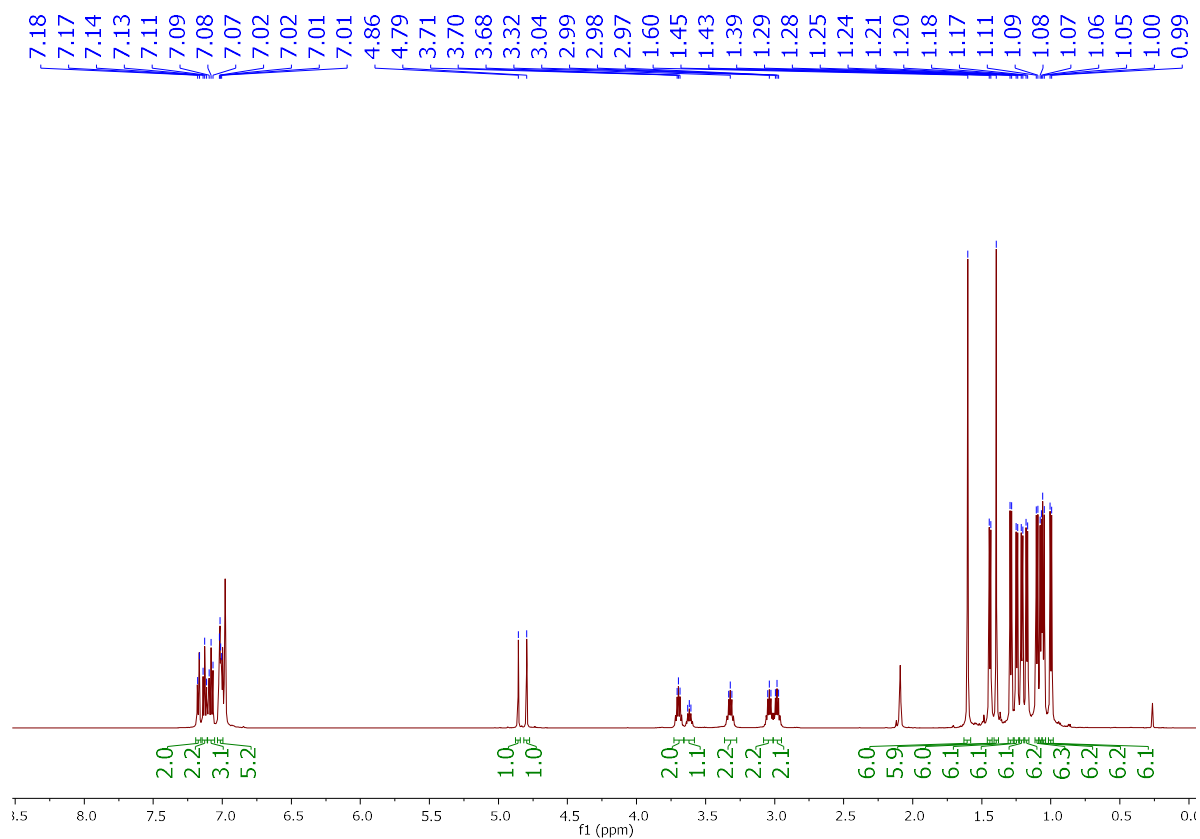

Figure S37.  $^1\text{H}$  NMR (300 MHz,  $\text{C}_6\text{D}_6$ , 298 K) spectrum of compound **8**.

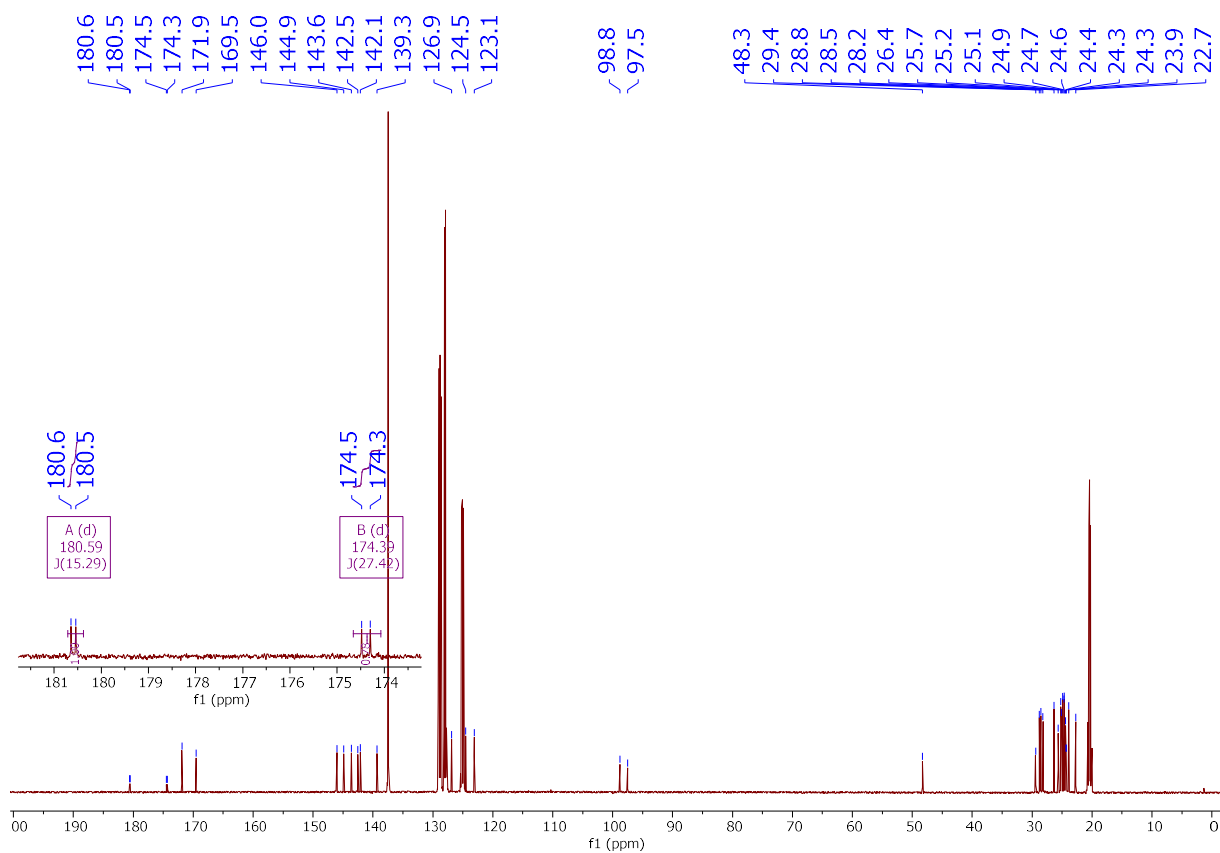

Figure S38.  $^{13}\text{C}\{^1\text{H}\}$  NMR (151 MHz, toluene- $d_8$ , 298 K) spectrum of compound **8**.

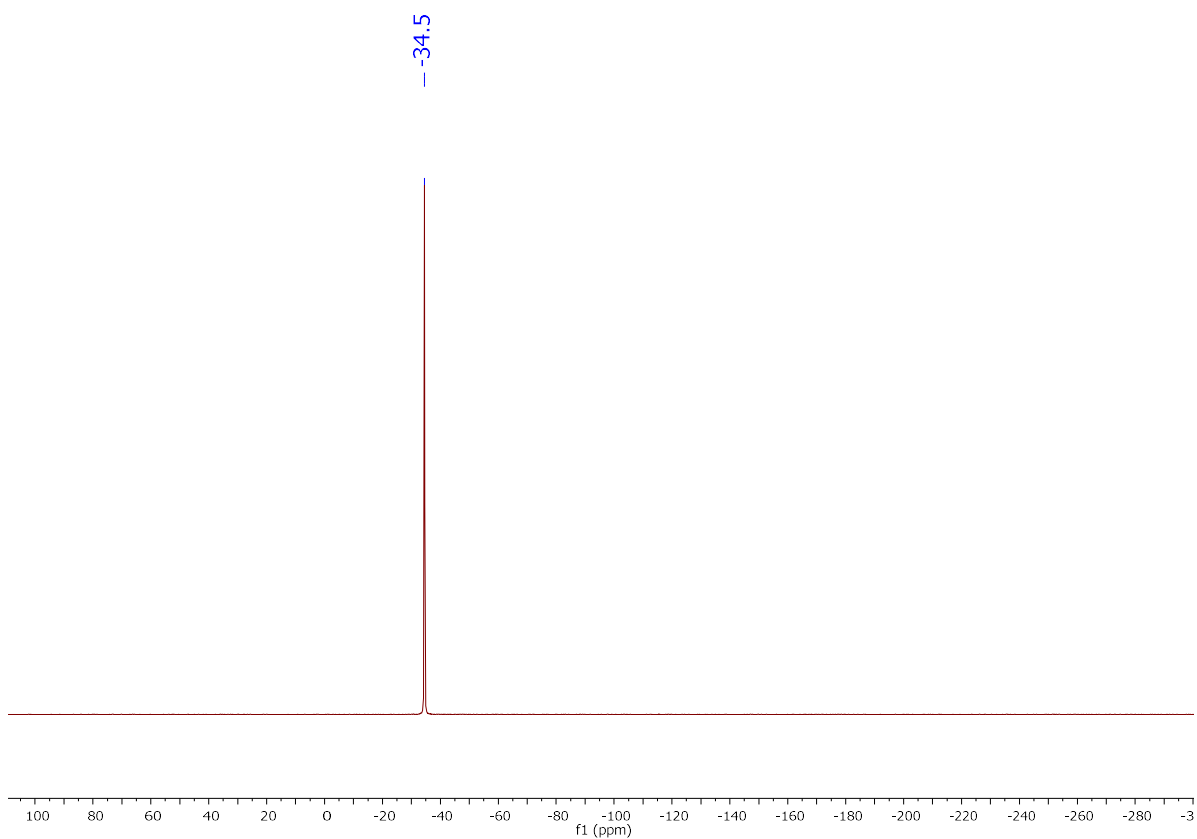

**Figure S39.**  $^{31}\text{P}\{^1\text{H}\}$  NMR (121 MHz, toluene- $d_8$ , 298 K) spectrum of compound **8**.

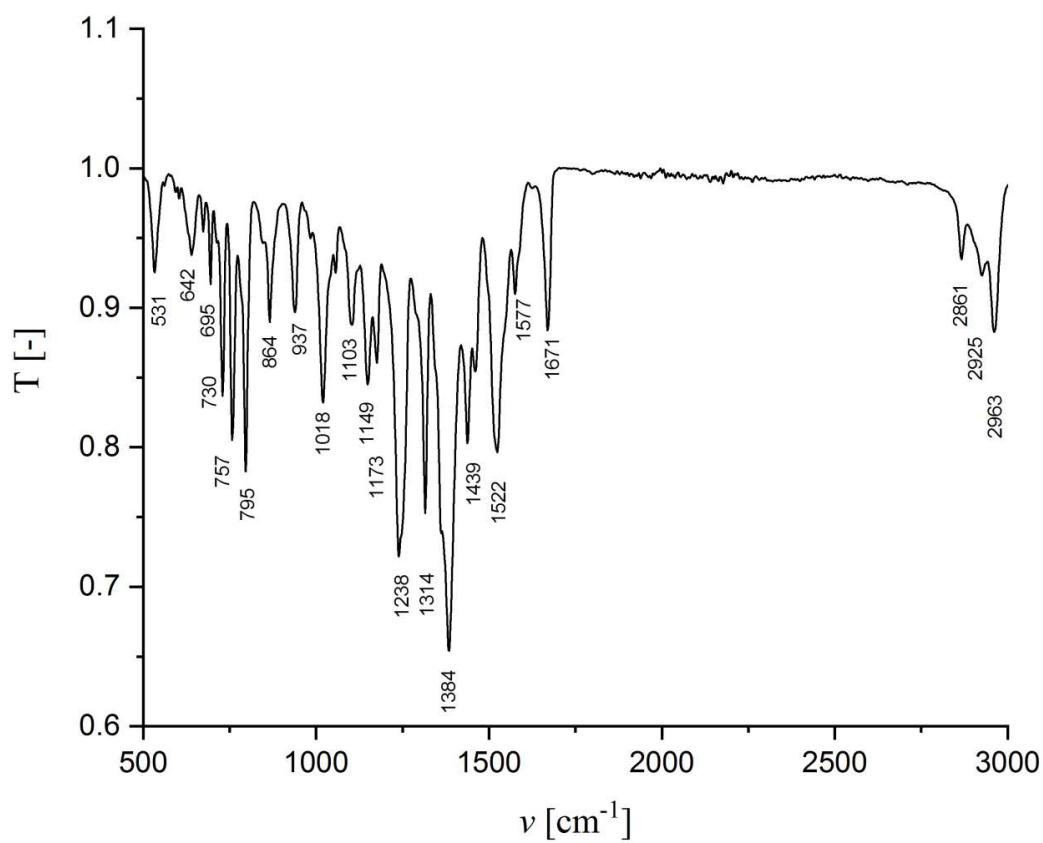

**Figure S40.** ATR-IR spectrum of **8**.

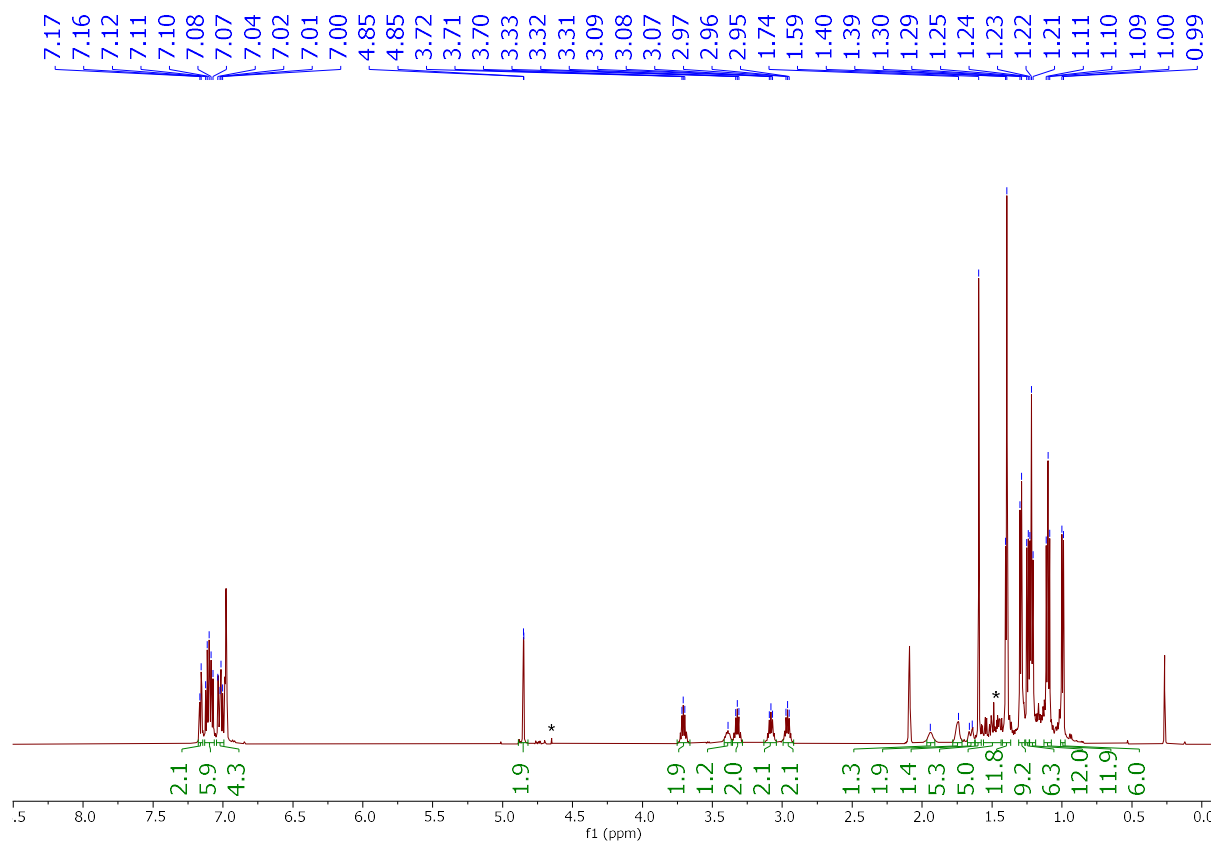

Figure S41.  $^1\text{H}$  NMR (600 MHz, toluene- $d_8$ , 298 K) spectrum of compound **9**. \*trace impurities.

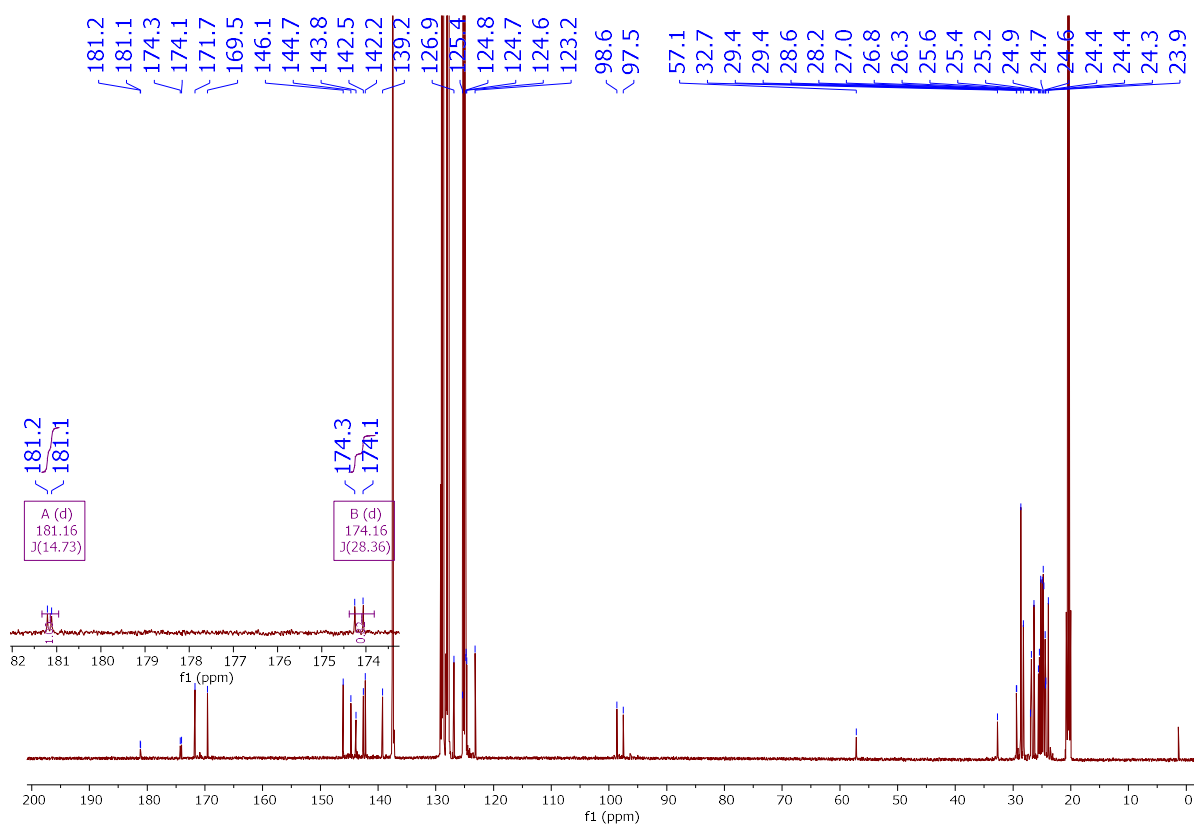

Figure S42.  $^{13}\text{C}\{^1\text{H}\}$  NMR (151 MHz, toluene- $d_8$ , 298 K) spectrum of compound **9**.

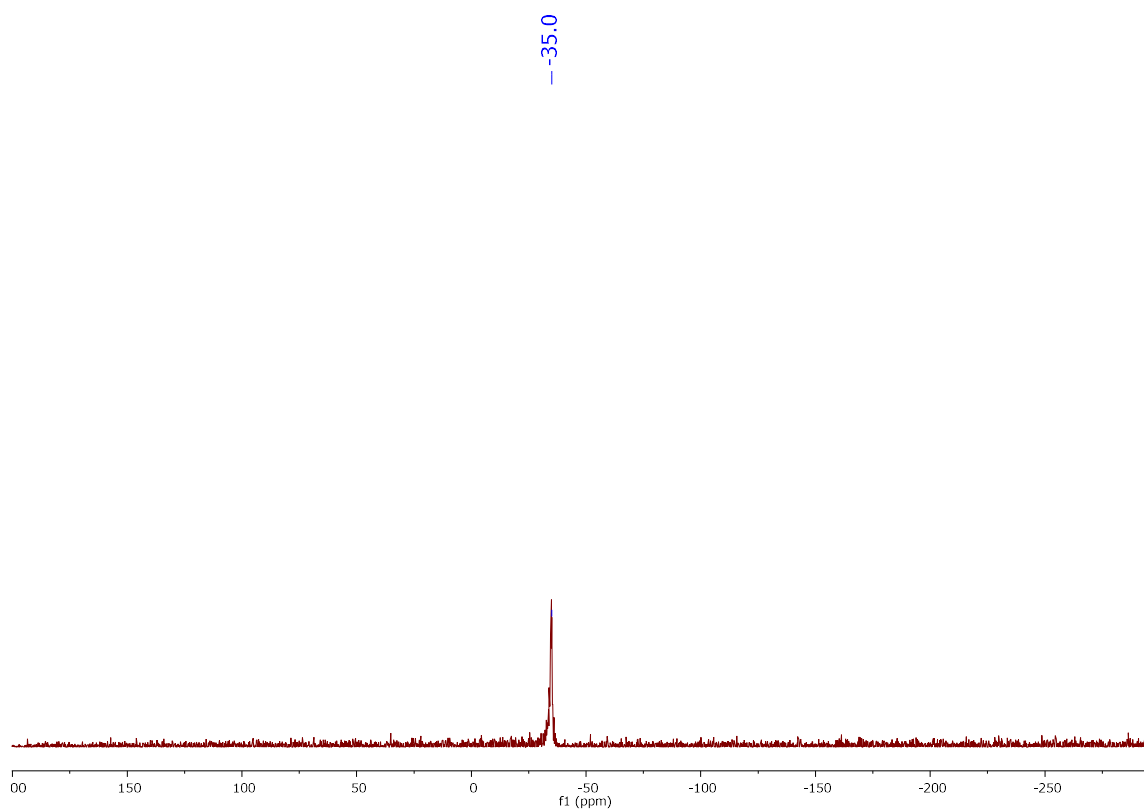

**Figure S43.**  $^{31}\text{P}\{^1\text{H}\}$  NMR (121 MHz, toluene- $d_8$ , 298 K) spectrum of compound **9**.

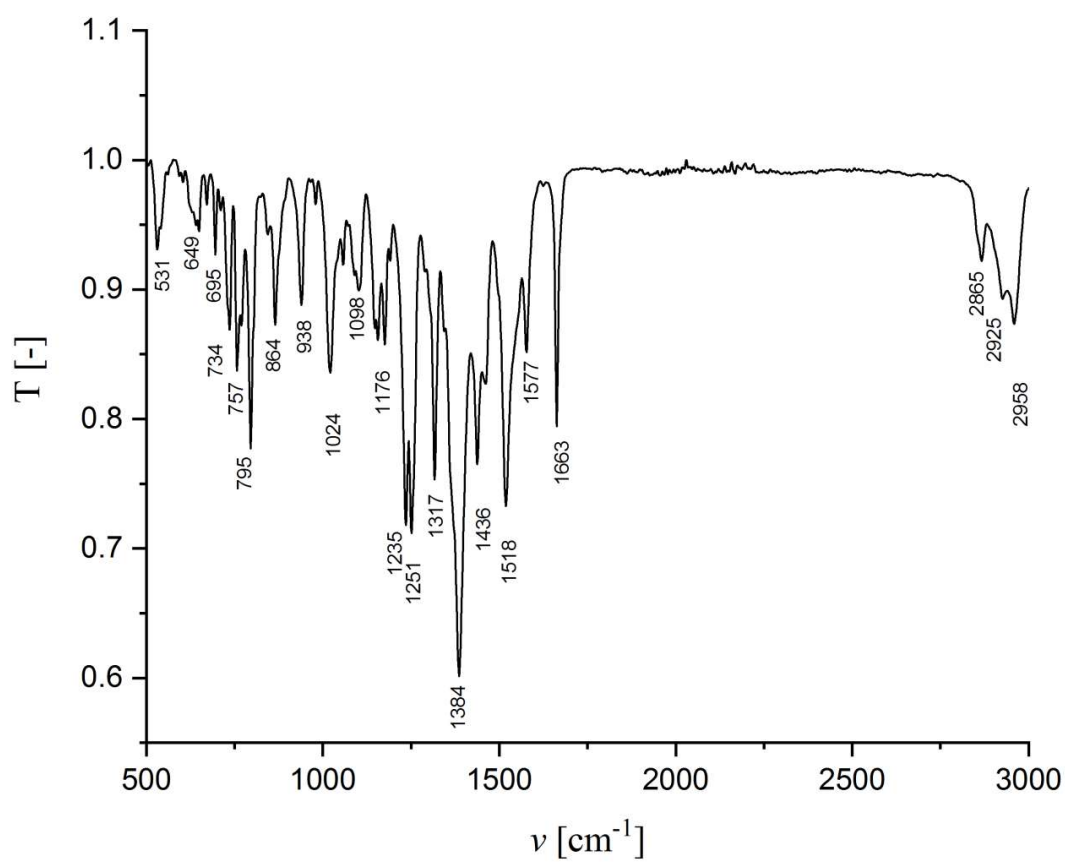

**Figure S44.** ATR-IR spectrum of **9**.

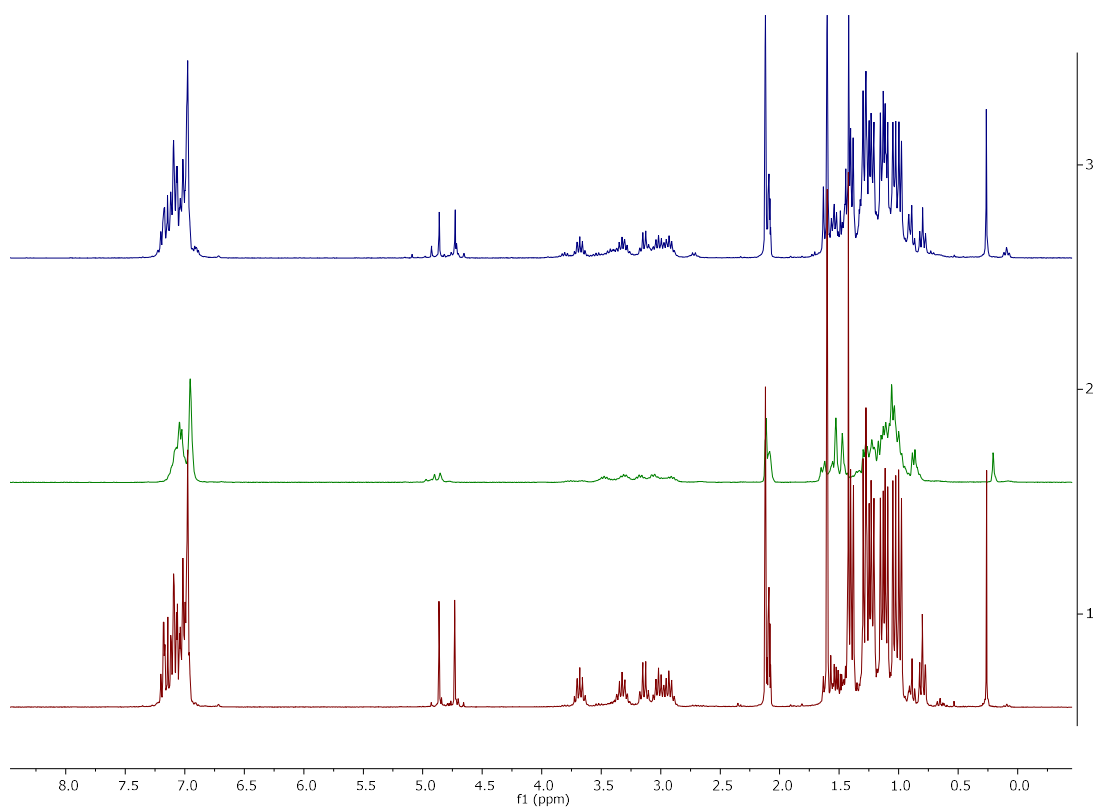

**Figure S45.**  $^1\text{H}$  NMR (300 MHz, toluene- $d_8$ ) spectra of the temperature dependent reversible reaction of  $\text{CO}_2$  and compound **4**; 1) compound **7**; 2) compound **7** after heating at  $90\text{ }^\circ\text{C}$ ; 3) after cooling to ambient temperature.

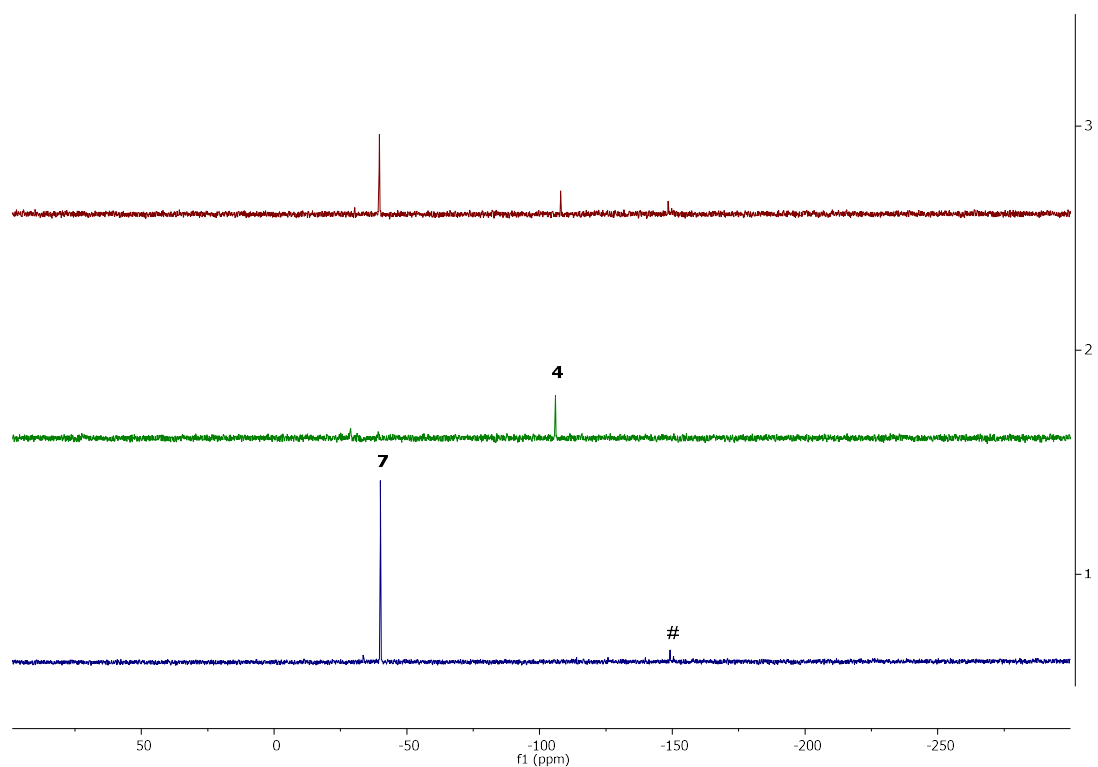

**Figure S46.**  $^{31}\text{P}\{^1\text{H}\}$  NMR (121 MHz, toluene- $d_8$ ) spectra of the temperature dependent reversible reaction of  $\text{CO}_2$  and compound **4**; 1) compound **7**; 2) compound **7** after heating at  $90\text{ }^\circ\text{C}$ ; 3) after cooling to ambient temperature. #unidentified impurity.

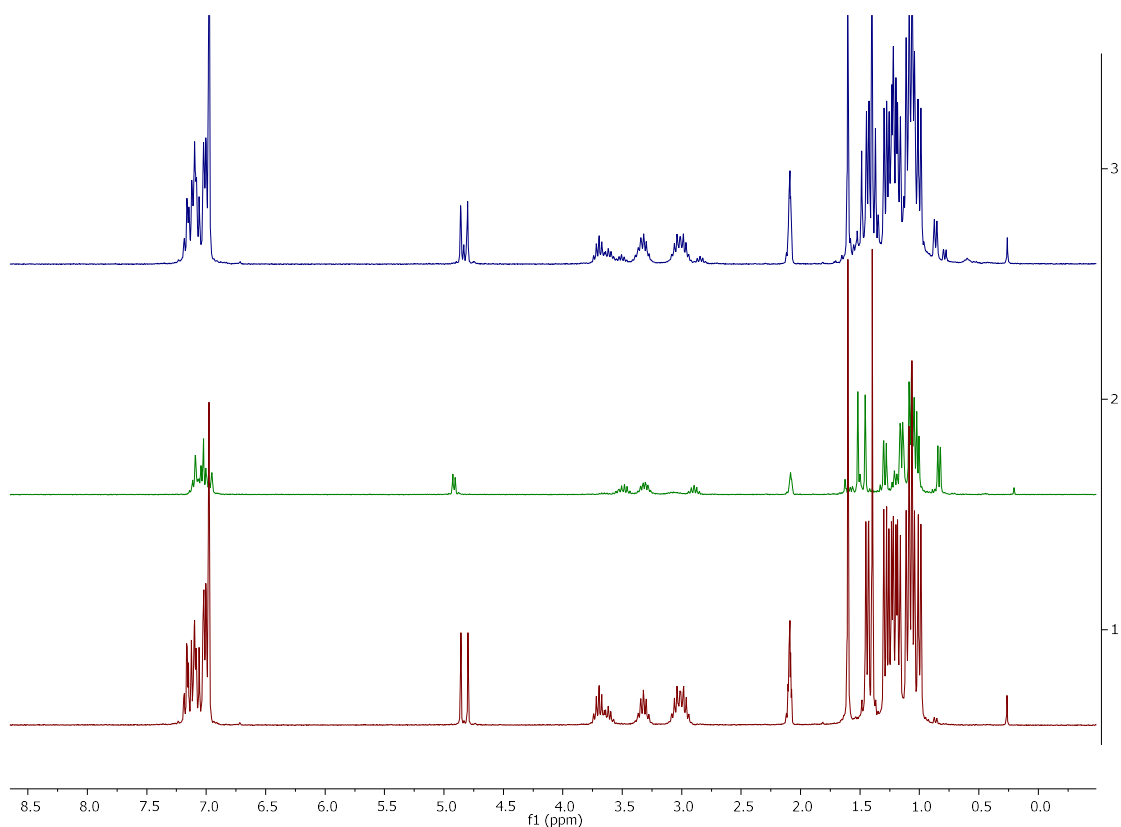

**Figure S47.**  $^1\text{H}$  NMR (300 MHz, toluene- $d_8$ ) spectra of the temperature dependent reversible reaction of  $\text{CO}_2$  and compound **5**; 1) compound **8**; 2) compound **8** after heating at 90 °C; 3) after cooling to ambient temperature.

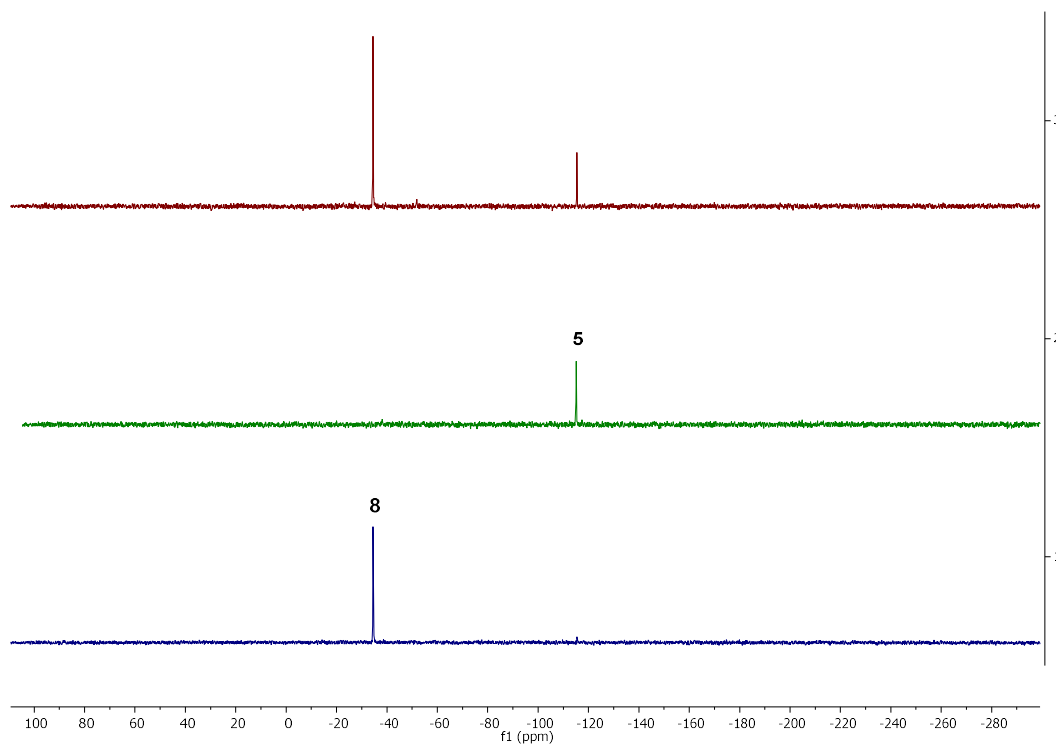

**Figure S48.**  $^{31}\text{P}\{^1\text{H}\}$  NMR (121 MHz, toluene- $d_8$ ) spectra tracking the temperature dependent reversible reaction of  $\text{CO}_2$  and compound **5**; 1) compound **8**; 2) compound **8** after heating at 90 °C; 3) after cooling to ambient temperature.



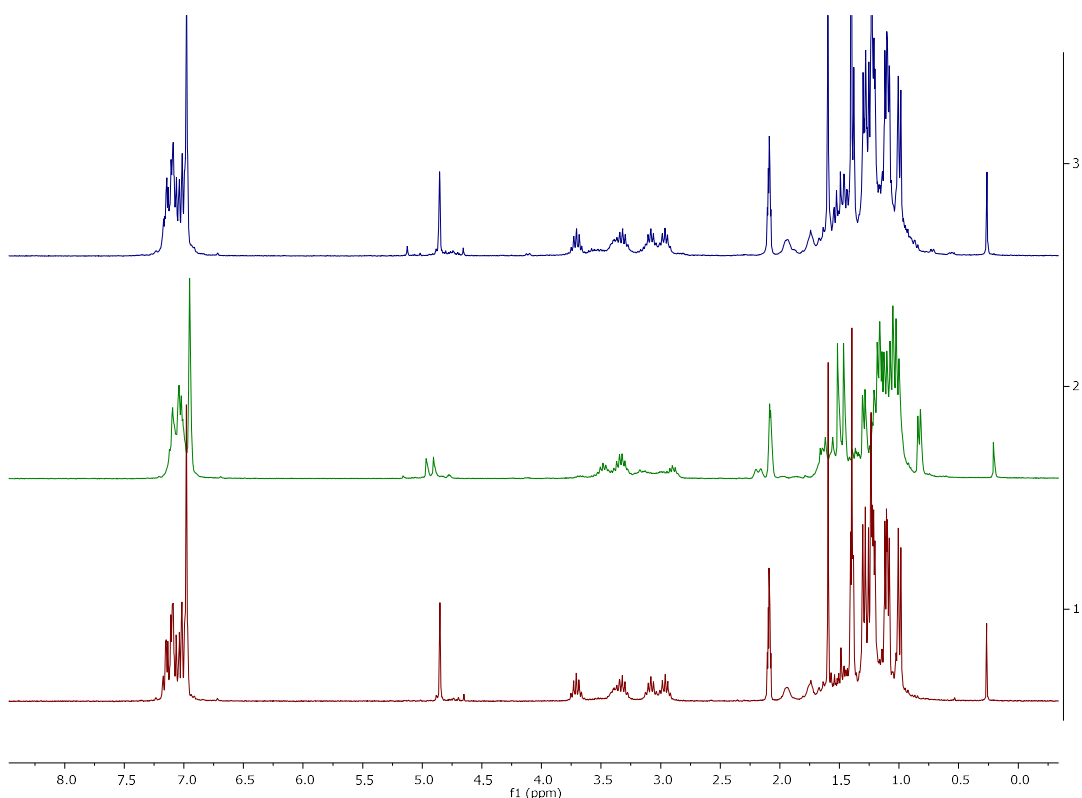

**Figure S49.**  $^1\text{H}$  NMR (300 MHz, toluene- $d_8$ ) spectra of the temperature dependent reversible reaction of  $\text{CO}_2$  and compound **6**; 1) compound **9**; 2) compound **9** after heating at 90 °C; 3) after cooling to ambient temperature.

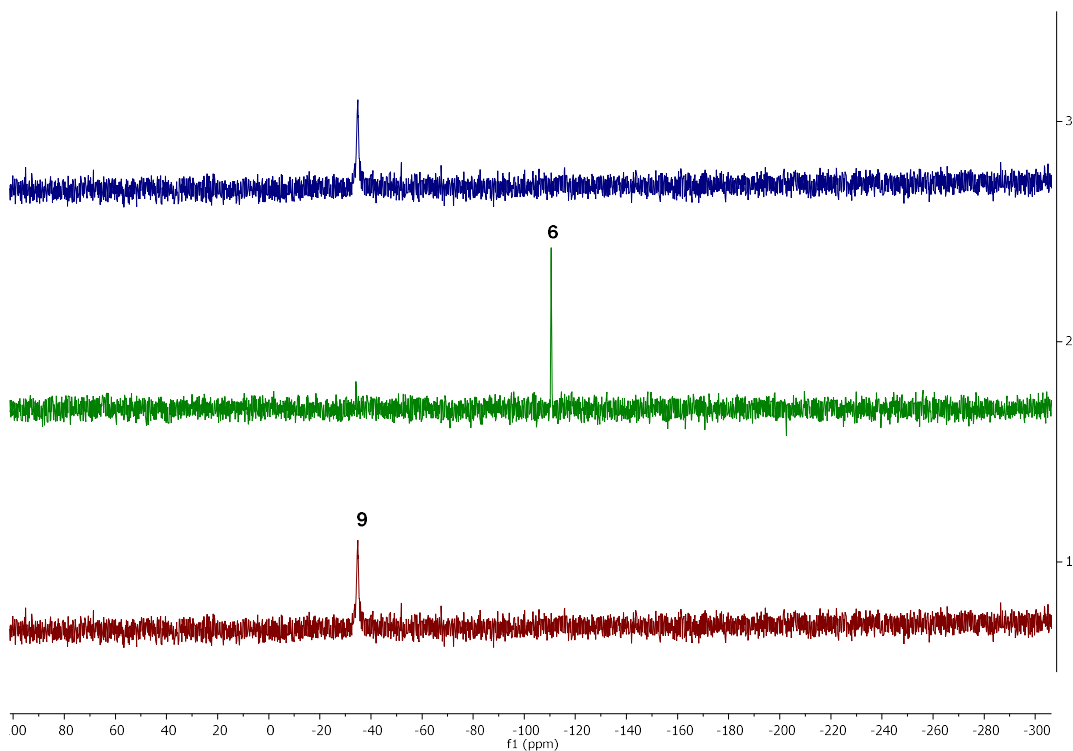

**Figure S50.**  $^{31}\text{P}\{^1\text{H}\}$  NMR (121 MHz, toluene- $d_8$ ) spectra tracking the temperature dependent reversible reaction of  $\text{CO}_2$  and compound **6**; 1) compound **9**; 2) compound **9** after heating at 90 °C; 3) after cooling to ambient temperature.

### 3. X-Ray Crystallographic Analysis

The crystals were mounted on nylon loops in inert oil. Data for **2** were collected on a Bruker AXS D8 Kappa diffractometer with APEX2 detector (mono-chromated  $\text{Mo}_{K\alpha}$  radiation,  $\lambda = 0.71073 \text{ \AA}$ ) and for **6**, **8**, and **9** were collected on a Bruker AXS D8 Venture diffractometer with Photon II detector (mono-chromated  $\text{Cu}_{K\alpha}$  radiation,  $\lambda = 1.54178 \text{ \AA}$ , micro-focus source) at 100(2) K. The structures were solved by Direct Methods (SHELXS-97)<sup>[3]</sup> and refined anisotropically by full-matrix least-squares on  $F^2$  (SHELXL-2014).<sup>[4-6]</sup> Absorption corrections were performed semi-empirically from equivalent reflections on basis of multi-scans (Bruker AXS APEX2). Hydrogen atoms were refined using a riding model or rigid methyl groups. **2** was refined as a 2-component inversion twin. The toluene molecule is disordered over two alternate sites. The bond lengths and angles of its phenyl ring were constrained to be equal (SADI) and its anisotropic displacement parameters were restrained with RIGU. In **6** an *i*-Pr group in residue 2 is disordered over two positions. All its corresponding bond lengths and angles were restrained to be equal (SADI). In both residues the phosphorous atom is disordered over two positions. In addition, in the residual density near Cl1 of residue 1 the CNCO unit of an alternate orientation of the CyNCO ligand can be identified, however, finding and refining the whole moiety failed due to the low residual density. The small displacement ellipsoid of N5 suggests that in the elusive second orientation CyNCO and Cl swap places. N5 would then be over-layered with a Cl atom leading to more electron density in the place. A refinement of a partially occupied Cl here failed due to the low occupancy. Considering the unresolved disorder, quantitative results should be carefully assessed. The crystal of **8** was a non-merohedral twin of strongly overlapping components which was identified but not integrated separately. Consequently, only the connectivity should be taken for granted. Quantitative results should not be discussed since the obtained intensity data is strongly distorted by the ignored twin components as indicated by the high  $R_{\text{int}}$ . A more suitable specimen was not available. In addition, the structure contains a highly disordered toluene molecule. The final refinement was done with a solvent free dataset from a PLATON/SQUEEZE run.<sup>[7]</sup> The molecule was included in the sum formula for completeness. A toluene molecule in **9** is disordered over three alternate positions. The occupancies were constrained to the values of the free variables in the last refinement cycles to avoid correlations and ensure a convergence of the refinement. All bond lengths and angles of the solvents' phenyl rings were restrained to be equal (SADI) and RIGU restraints were applied to the anisotropic displacement parameters.

CCDC-2089048 (**2**), -2089049 (**6**), -2089050 (**8**), and -2089051 (**9**) contains the supplementary crystallographic data for this paper. These data can be obtained free of charge from The Cambridge Crystallographic Data Centre via [www.ccdc.cam.ac.uk/data\\_request/cif](http://www.ccdc.cam.ac.uk/data_request/cif).

**Table S1.** Crystal data and structure refinement of **2** and **6**.

| Compound                                                   | <b>2</b>                                                            | <b>6</b>                                                             |
|------------------------------------------------------------|---------------------------------------------------------------------|----------------------------------------------------------------------|
| Emp. formula                                               | C <sub>72</sub> H <sub>104</sub> ClGa <sub>2</sub> N <sub>6</sub> P | C <sub>68</sub> H <sub>100</sub> ClGa <sub>2</sub> N <sub>5</sub> OP |
| Formula weight                                             | 1259.47                                                             | 1209.38                                                              |
| Temperature [K]                                            | 100(2)                                                              | 100(2)                                                               |
| Crystal system                                             | monoclinic                                                          | orthorhombic                                                         |
| Space group                                                | <i>P</i> 2 <sub>1</sub>                                             | <i>P</i> 2 <sub>1</sub> 2 <sub>1</sub> 2 <sub>1</sub>                |
| <i>a</i> [Å]                                               | 12.3792(15)                                                         | 13.2671(8)                                                           |
| <i>b</i> [Å]                                               | 12.7475(15)                                                         | 14.3515(9)                                                           |
| <i>c</i> [Å]                                               | 21.578(3)                                                           | 68.902(4)                                                            |
| $\alpha$ [°]                                               | 90                                                                  | 90                                                                   |
| $\beta$ [°]                                                | 92.262(3)                                                           | 90                                                                   |
| $\gamma$ [°]                                               | 90                                                                  | 90                                                                   |
| <i>V</i> [Å <sup>3</sup> ]                                 | 3402.5(7)                                                           | 13119.1(1)                                                           |
| <i>Z</i>                                                   | 2                                                                   | 8                                                                    |
| $\rho$ [Mgm <sup>-3</sup> ]                                | 1.229                                                               | 1.225                                                                |
| $\mu$ [mm <sup>-1</sup> ]                                  | 0.899                                                               | 1.942                                                                |
| <i>F</i> (000)                                             | 1344                                                                | 5160                                                                 |
| Crystal size [mm]                                          | 0.411 × 0.215 × 0.130                                               | 0.162 × 0.096 × 0.057                                                |
| $\theta$ max [°]                                           | 33.448                                                              | 78.458                                                               |
| Index ranges                                               | -19 ≤ <i>h</i> ≤ 19<br>-19 ≤ <i>k</i> ≤ 19<br>-33 ≤ <i>l</i> ≤ 33   | -16 ≤ <i>h</i> ≤ 15<br>-18 ≤ <i>k</i> ≤ 18<br>-87 ≤ <i>l</i> ≤ 86    |
| No. of reflect. collected                                  | 147001                                                              | 482739                                                               |
| Unique reflect.                                            | 26323                                                               | 27953                                                                |
| <i>R</i> <sub>int</sub>                                    | 0.0306                                                              | 0.1205                                                               |
| Data / restraints / params.                                | 24791/223/830                                                       | 25967/25/1497                                                        |
| Goodness-of-fit on F <sup>2</sup>                          | 1.013                                                               | 1.069                                                                |
| <i>R</i> 1 [ <i>I</i> > 2σ( <i>I</i> )]                    | 0.0214                                                              | 0.0554                                                               |
| <i>wR</i> 2 [ <i>I</i> > 2σ( <i>I</i> )]                   | 0.0515                                                              | 0.1288                                                               |
| <i>R</i> 1 [all data]                                      | 0.0242                                                              | 0.0608                                                               |
| <i>wR</i> 2 [all data]                                     | 0.0522                                                              | 0.1321                                                               |
| <i>x</i> (Flack)                                           | 0.115(3)                                                            | 0.058(13)                                                            |
| Largest diff. peak and hole max./min. [e·Å <sup>-3</sup> ] | 0.389/-0.253                                                        | 1.630/-0.613                                                         |

**Table S2.** Crystal data and structure refinement of **8** and **9**.

| Compound                                                   | <b>8</b>                                                                             | <b>9</b>                                                                           |
|------------------------------------------------------------|--------------------------------------------------------------------------------------|------------------------------------------------------------------------------------|
| Emp. formula                                               | C <sub>66.50</sub> H <sub>93</sub> ClGa <sub>2</sub> N <sub>5</sub> O <sub>3</sub> P | C <sub>80</sub> H <sub>109</sub> ClGa <sub>2</sub> N <sub>5</sub> O <sub>3</sub> P |
| Formula weight                                             | 1216.31                                                                              | 1394.58                                                                            |
| Temperature [K]                                            | 100(2)                                                                               | 100(2)                                                                             |
| Crystal system                                             | triclinic                                                                            | triclinic                                                                          |
| Space group                                                | <i>P</i> -1                                                                          | <i>P</i> -1                                                                        |
| <i>a</i> [Å]                                               | 12.7138(13)                                                                          | 12.4401(7)                                                                         |
| <i>b</i> [Å]                                               | 22.680(2)                                                                            | 12.7679(7)                                                                         |
| <i>c</i> [Å]                                               | 23.894(2)                                                                            | 23.7801(12)                                                                        |
| $\alpha$ [°]                                               | 82.361(5)                                                                            | 88.165(3)                                                                          |
| $\beta$ [°]                                                | 88.926(5)                                                                            | 83.535(3)                                                                          |
| $\gamma$ [°]                                               | 76.638(5)                                                                            | 85.239(3)                                                                          |
| <i>V</i> [Å <sup>3</sup> ]                                 | 6643.2(11)                                                                           | 3739.1(4)                                                                          |
| <i>Z</i>                                                   | 4                                                                                    | 2                                                                                  |
| $\rho$ [Mgm <sup>-3</sup> ]                                | 1.216                                                                                | 1.239                                                                              |
| $\mu$ [mm <sup>-1</sup> ]                                  | 1.946                                                                                | 1.794                                                                              |
| <i>F</i> (000)                                             | 2580                                                                                 | 1484                                                                               |
| Crystal size [mm]                                          | 0.220 × 0.119 × 0.042                                                                | 0.095 × 0.074 × 0.051                                                              |
| $\theta$ max [°]                                           | 75.564                                                                               | 81.135                                                                             |
| Index ranges                                               | -15 ≤ <i>h</i> ≤ 15<br>-28 ≤ <i>k</i> ≤ 28<br>-29 ≤ <i>l</i> ≤ 29                    | -15 ≤ <i>h</i> ≤ 14<br>-16 ≤ <i>k</i> ≤ 16<br>-30 ≤ <i>l</i> ≤ 30                  |
| No. of reflect. collected                                  | 247431                                                                               | 208100                                                                             |
| Unique reflect.                                            | 27202                                                                                | 16280                                                                              |
| <i>R</i> <sub>int</sub>                                    | 0.2748                                                                               | 0.0714                                                                             |
| Data / restraints / params.                                | 17943/0/1396                                                                         | 13586/732/982                                                                      |
| Goodness-of-fit on F <sup>2</sup>                          | 1.076                                                                                | 1.024                                                                              |
| <i>R</i> 1 [ <i>I</i> > 2σ( <i>I</i> )]                    | 0.0806                                                                               | 0.0335                                                                             |
| <i>wR</i> 2 [ <i>I</i> > 2σ( <i>I</i> )]                   | 0.2175                                                                               | 0.0810                                                                             |
| <i>R</i> 1 [all data]                                      | 0.1266                                                                               | 0.0441                                                                             |
| <i>wR</i> 2 [all data]                                     | 0.2516                                                                               | 0.0880                                                                             |
| Largest diff. peak and hole max./min. [e·Å <sup>-3</sup> ] | 1.360/-1.459                                                                         | 0.608/-0.414                                                                       |

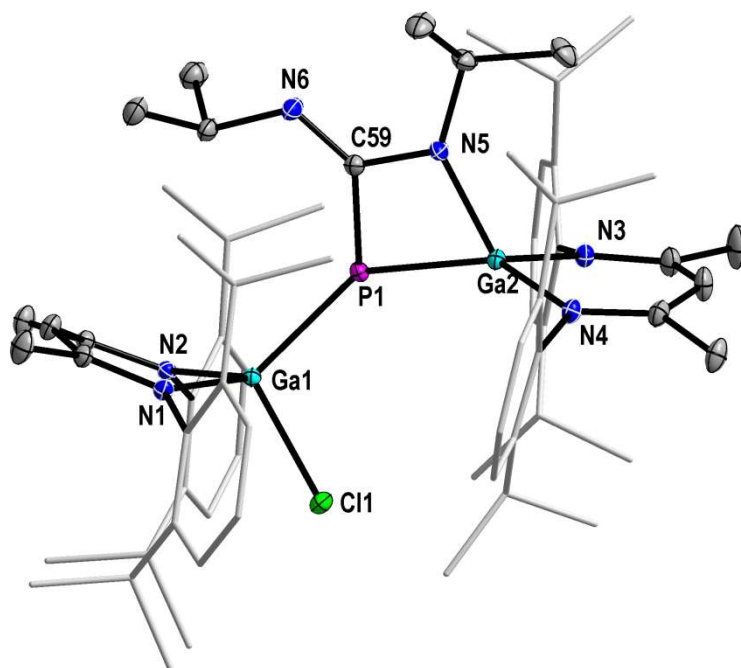

**Figure S51.** Molecular structure of **2** with thermal ellipsoids at 50% probability level. The hydrogen atoms and solvent molecules (toluene) are omitted for clarity. Selected bond length (Å) and angles (°): Ga1-N1 1.9511(11), Ga1-N2 1.9861(11), Ga1-Cl1 2.1967(4), Ga1-P1 2.3084(4), Ga2-N5 1.9279(11), Ga2-N4 1.9668(11), Ga2-N3 1.9704(12), Ga2-P1 2.3115(4), P1-C59 1.8860(13), N5-C59 1.3882(17), N6-C59 1.2834(17); N1-Ga1-N2 95.57(5), N1-Ga1-Cl1 108.52(3), N2-Ga1-Cl1 106.61(3), N1-Ga1-P1 128.82(4), N2-Ga1-P1 110.66(3), Cl1-Ga1-P1 104.915(14), N5-Ga2-N4 116.74(5), N5-Ga2-N3 116.42(5), N4-Ga2-N3 97.34(5), N5-Ga2-P1 75.96(4), N4-Ga2-P1 142.51(4), N3-Ga2-P1 108.21(4), C59-P1-Ga1 121.55(4), C59-P1-Ga2 75.66(4), Ga1-P1-Ga2 130.987(17), C59-N5-Ga2 101.82(8), N5-C59-P1 105.66(9).

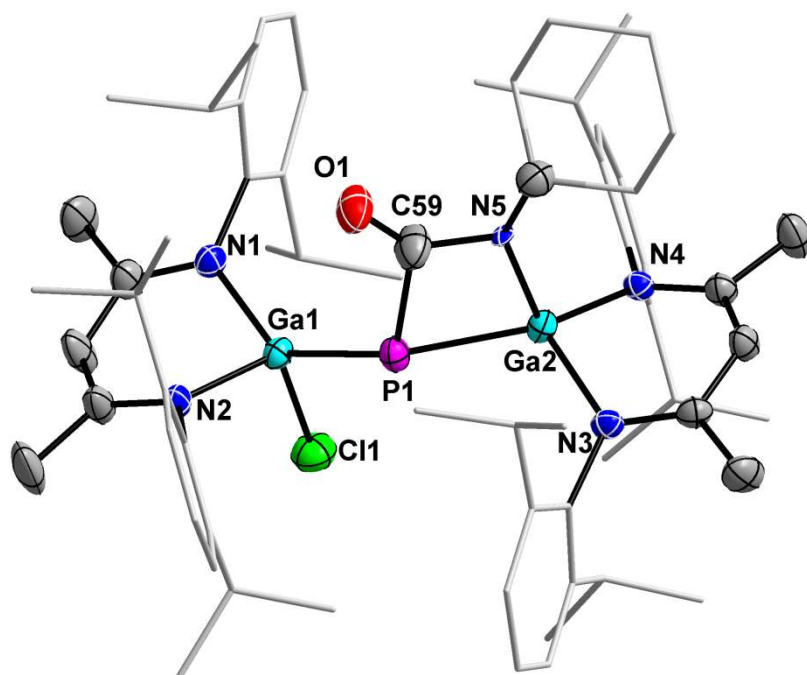

**Figure S52.** Molecular structure of **6** with thermal ellipsoids at 50% probability level. The hydrogen atoms, a solvent molecule (*n*-hexane) and the alternate positions of the disordered parts are omitted for clarity. Selected bond length (Å) and angles (°): Ga1-N2 1.949(5), Ga1-N1 1.949(5), Ga1-Cl1 2.2102(17), Ga1-P1 2.296(2), Ga2-N4 1.937(4), Ga2-N3 1.961(5), Ga2-N5 2.005(4), Ga2-P1 2.266(2), P1-C59 1.904(7), O1-C59 1.234(8), N5-C59 1.366(8); N2-Ga1-N1 95.9(2), N2-Ga1-Cl1 107.14(16), N1-Ga1-Cl1 105.83(15), N2-Ga1-P1 105.32(16), N1-Ga1-P1 135.06(16), Cl1-Ga1-P1 104.99(8), N4-Ga2-N3 95.92(19), N4-Ga2-N5 113.34(18), N3-Ga2-N5 112.03(18), N4-Ga2-P1 148.61(15), N3-Ga2-P1 107.98(15), N5-Ga2-P1 76.64(13), C59-P1-Ga2 75.9(2), C59-P1-Ga1 115.8(3), Ga2-P1-Ga1 132.96(11), O1-C59-N5 126.3(6), O1-C59-P1 124.1(5), N5-C59-P1 107.5(4).

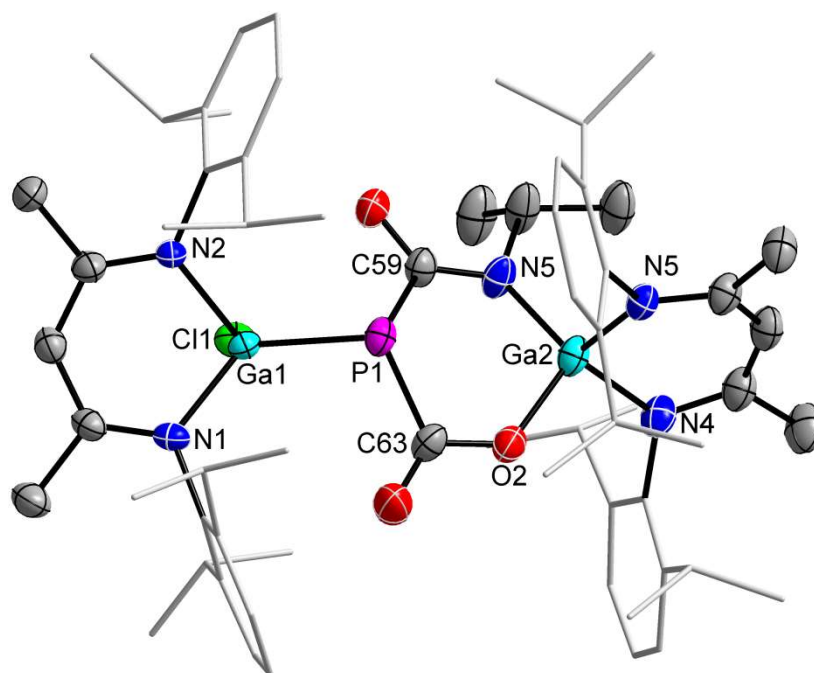

**Figure S53.** Molecular structure of **8** with thermal ellipsoids at 50% probability level. The hydrogen atoms are omitted for clarity. Selected bond length (Å) and angles (°): Ga1-N1 1.944(4), Ga1-N2 1.962(4), Ga1-Cl1 2.2015(14), Ga1-P1 2.3272(15), Ga2-O2 1.840(4), Ga2-N5 1.887(5), Ga2-N4 1.917(4), Ga2-N3 1.942(5), P1-C63 1.861(5), P1-C59 1.863(6), O1-C59 1.240(7), O2-C63 1.322(7), O3-C63 1.187(7); N1-Ga1-N2 95.93(16), N1-Ga1-Cl1 106.70(14), N2-Ga1-Cl1 104.62(14), N1-Ga1-P1 118.95(15), N2-Ga1-P1 113.13(13), Cl1-Ga1-P1 115.08(5), O2-Ga2-N5 107.17(19), O2-Ga2-N4 100.45(19), N5-Ga2-N4 124.8(2), O2-Ga2-N3 114.54(19), N5-Ga2-N3 110.2(2), N4-Ga2-N3 99.73(19), C63-P1-C59 109.2(2), C63-P1-Ga1 107.9(2), C59-P1-Ga1 95.26(18), C63-O2-Ga2 127.5(4).

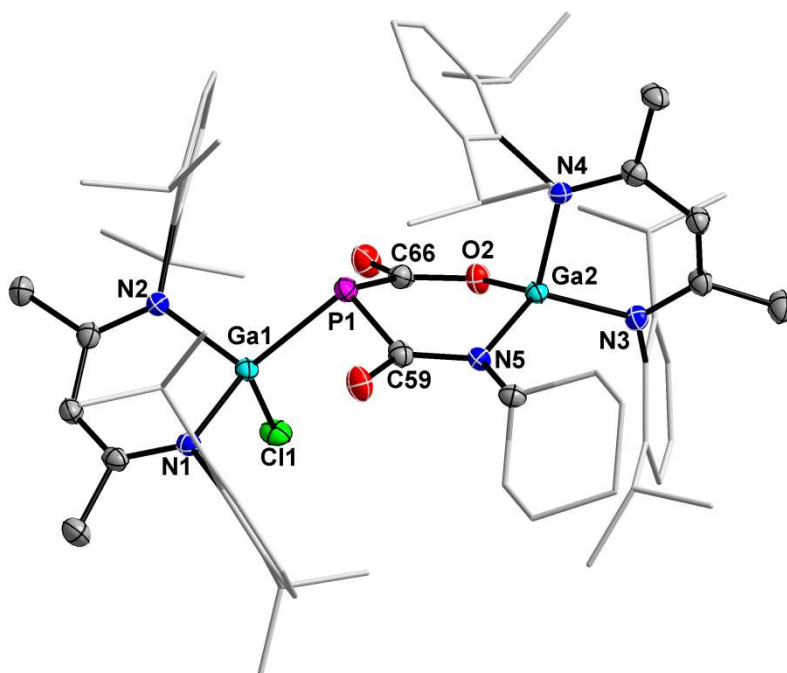

**Figure S54.** Molecular structure of **9** with thermal ellipsoids at 50% probability level. The hydrogen atoms and a solvent molecule (toluene) are omitted for clarity. Selected bond length (Å) and angles (°): Ga1-N1 1.9432(14), Ga1-N2 1.9604(14), Ga1-Cl1 2.1961(4), Ga1-P1 2.3215(5), Ga2-O2 1.8337(12), Ga2-N5 1.8963(14), Ga2-N3 1.9142(14), Ga2-N4 1.9407(13), P1-C66 1.8524(18), P1-C59 1.8563(18), O1-C59 1.228(2), O2-C66 1.323(2), O3-C66 1.214(2); N1-Ga1-N2 97.20(6), N1-Ga1-Cl1 104.46(4), N2-Ga1-Cl1 104.15(4), N1-Ga1-P1 125.76(4), N2-Ga1-P1 108.44(4), Cl1-Ga1-P1 113.815(18), O2-Ga2-N5 107.31(6), O2-Ga2-N3 102.60(6), N5-Ga2-N3 123.62(6), O2-Ga2-N4 110.11(6), N5-Ga2-N4 112.61(6), N3-Ga2-N4 99.79(6), C66-P1-C59 109.84(8), C66-P1-Ga1 99.52(5), C59-P1-Ga1 103.16(5), C66-O2-Ga2 125.50(11).



#### 4. Computational Details

All calculations were performed by using the program package Gaussian 16<sup>[8]</sup>. The geometrical parameters of all stationary points were optimized by means of the density functional B3LYP<sup>[9]</sup> together with the dispersion correction with Becke-Johnson damping<sup>[10]</sup> (D3BJ). For the determination of the energetics of the reaction, the basis set def2-TZVP was applied. In order to calculate the reaction mechanism, the 6-31G\* basis was used. For all structures C1 symmetry was applied. Frequency calculations were carried out at each of the stationary points to verify the nature of the stationary point. It turned out that all products have no imaginary frequency, whereas the two transition states have exactly one. Furthermore, single point calculations were performed on the B3LYP-D3BJ/6-31G\*-optimized structures by means of B3LYP-D3BJ/def2-TZVP.

##### *Influence of the Dipp groups on the reaction behavior*

In order to determine the influence of the sterically demanding Dipp groups on the observed reaction behavior, the [2+2] cycloaddition of the reference system (RS) **RS1**, in which the Dipp groups in **1** are replaced by small methyl substituents, to the corresponding heterocycles **RS2–RS5** were studied (Scheme S2). In a second step, the energetic parameters of the cycloaddition reaction of the four-membered metallaheterocycles **2**, **4**, **10**, **12** and **RS2–RS5** with CO<sub>2</sub> to the six-membered metallaheterocycles **7**, **13–15** and **RS6–RS9** were calculated (Scheme S2). A comparison between the data for the gallaphosphenes **1** and **RS1** reveals, that only in the case of the carbodiimides a strong deviation from one another is found. For the addition of DMC to **1** and **RS1**, almost the same values are found, while this is not the case for the cycloaddition of the larger carbodiimide DIC. The reaction of DIC with **RS1** is energetically more favorable than that of DMC with **RS1**; in the case of **1**, the order is reversed. This demonstrates the influence of the Dipp groups of the  $\beta$ -diketiminato ligands: the large isopropyl groups lead to steric repulsive interactions making the formation of **2** (R = Dipp) approx. 4 kcal/mol less favorable than that of **RS5** (R = Me).

The calculated Gibbs free energies ( $\Delta G$ ) for the addition to the reference system **RS1** show the same trend as the calculated energies ( $\Delta E$ ): CO<sub>2</sub> addition is by far the most unfavorable, then EtNCO and DMC additions follow, and the addition of DIC exhibits the energetically most favored value. A different order is found for gallaphosphene **1**. Here, the addition of DIC is even less favorable than that of EtNCO. This means that starting from **1** the formation of **2** is less favorable than the formation of **4** due to entropic reasons. Presumably, the free

rotation of the large groups in **2** is severely restricted and the entropy loss during the cycloaddition is correspondingly high.

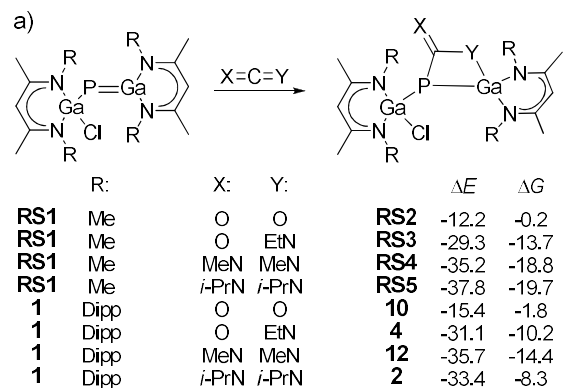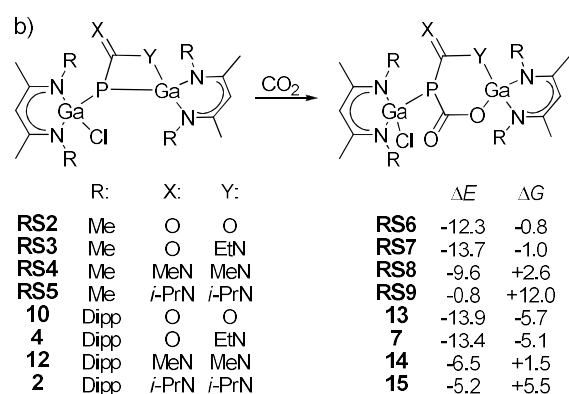

Dipp = 2,6-*i*-Pr<sub>2</sub>C<sub>6</sub>H<sub>3</sub>

**Scheme S2.** a) Calculation of the [2+2] cycloaddition reactions of gallaphosphenes **1** and **RS1** with CO<sub>2</sub>, isocyanate EtNCO and two carbodiimides DMC and DIC to the four-membered metallaheterocycles **2**, **4**, **10**, **12** and **RS2–RS5**. b) Calculation of the addition of CO<sub>2</sub> to the metallaheterocycles **2**, **4**, **10**, **12** and **RS2–RS5** yielding the six-membered metallaheterocycles **7**, **13–15** and **RS6–RS9**. The calculations were performed using B3LYP-D3BJ/def2-TZVP and the energy values are given in kcal/mol.

## 5. Cartesian Coordinates and Absolute Energies for All Calculated Compounds

**Table S3.** Absolute energies [au] of **1**, **2**, **4**, **7**, **10-15** and **RS1-RS9** calculated by means B3LYP-D3BJ/def2-TZVP.

|                       | <i>E</i>     | <i>G</i>     |
|-----------------------|--------------|--------------|
| CO <sub>2</sub>       | -188.671581  | -188.680564  |
| EtN=C=O               | -247.420958  | -247.372101  |
| MeN=C=NMe             | -227.501536  | -227.441922  |
| <i>i</i> -PrN=C=Ni-Pr | -384.847226  | -384.683500  |
| <b>RS1</b>            | -5420.153444 | -5419.823496 |
| <b>1</b>              | -7131.516108 | -7130.348273 |
| <b>RS2</b>            | -5608.844451 | -5608.504329 |
| <b>10</b>             | -7320.212173 | -7319.031643 |
| <b>RS6</b>            | -5797.535601 | -5797.186198 |
| <b>13</b>             | -7508.905936 | -7507.721369 |
| <b>RS3</b>            | -5667.621040 | -5667.217459 |
| <b>4</b>              | -7378.986696 | -7377.736580 |
| <b>RS7</b>            | -5856.314385 | -5855.899541 |
| <b>7</b>              | -7567.679568 | -7566.425322 |
| <b>RS4</b>            | -5647.711040 | -5647.295424 |
| <b>12</b>             | -7359.074464 | -7357.813111 |
| <b>RS8</b>            | -5836.397975 | -5835.971878 |
| <b>14</b>             | -7547.756456 | -7546.491359 |
| <b>RS5</b>            | -5805.060938 | -5804.538370 |
| <b>2</b>              | -7516.416505 | -7515.045034 |
| <b>RS9</b>            | -5993.733767 | -5993.199743 |
| <b>15</b>             | -7705.096392 | -7703.716865 |
| <b>11</b>             | -7378.975817 | -7377.727521 |

**Table S4.** Absolute energies [au] of **1**, **4**, **10**, **TS<sub>1-4</sub>** and **TS<sub>1-10</sub>** calculated by means of different methods.

|                          | <i>E<sup>a</sup></i> | <i>G<sup>a</sup></i> | <i>E<sup>b</sup></i> |
|--------------------------|----------------------|----------------------|----------------------|
| CO <sub>2</sub>          | -188.582581          | -188.591707          | -188.671227          |
| EtN=C=O                  | -247.315618          | -247.266333          | -247.420578          |
| <b>1</b>                 | -7126.709669         | -7125.521419         | -7131.508923         |
| <b>TS<sub>1-10</sub></b> | -7315.300074         | -7314.101426         | -7320.177414         |
| <b>10</b>                | -7315.325668         | -7314.129424         | -7320.204522         |
| <b>TS<sub>1-4</sub></b>  | -7374.051336         | -7372.786884         | -7378.942449         |
| <b>4</b>                 | -7374.090857         | -7372.824263         | -7378.980314         |

<sup>a</sup> B3LYP-D3BJ/6-31G\*. <sup>b</sup> B3LYP-D3BJ/def2-TZVP//B3LYP-D3BJ/6-31G\*.

Cartesian coordinates of the optimized geometry for CO<sub>2</sub> at B3LYP-D3BJ/def2-TZVP level of theory (number of imaginary frequencies = 0):

|   |            |            |             |
|---|------------|------------|-------------|
| C | 0.00000000 | 0.00000000 | 0.00000000  |
| O | 0.00000000 | 0.00000000 | 1.15970600  |
| O | 0.00000000 | 0.00000000 | -1.15970600 |

Cartesian coordinates of the optimized geometry for EtN=C=O at B3LYP-D3BJ/def2-TZVP level of theory (number of imaginary frequencies = 0):

|   |             |             |             |
|---|-------------|-------------|-------------|
| C | -1.36084900 | -0.06937300 | -0.00004500 |
|---|-------------|-------------|-------------|

|   |             |             |             |
|---|-------------|-------------|-------------|
| O | -2.53286800 | -0.04409200 | 0.00096600  |
| N | -0.17352400 | -0.22048700 | -0.00222500 |
| C | 1.03821200  | 0.57224400  | -0.00007500 |
| H | 1.04193100  | 1.21885800  | -0.88123400 |
| H | 1.03978200  | 1.21786800  | 0.88182300  |
| C | 2.26674100  | -0.32104500 | 0.00080900  |
| H | 3.17177700  | 0.28834300  | 0.00200200  |
| H | 2.27883000  | -0.96031000 | 0.88402000  |
| H | 2.28066900  | -0.95957200 | -0.88291000 |

Cartesian coordinates of the optimized geometry for MeN=C=NMe at B3LYP-D3BJ/def2-TZVP level of theory (number of imaginary frequencies = 0):

|   |             |             |             |
|---|-------------|-------------|-------------|
| N | -1.15290000 | 0.40013900  | -0.37850000 |
| N | 1.15255700  | 0.39858700  | 0.37923500  |
| C | -0.00011700 | 0.32117800  | 0.00022100  |
| C | 2.28924100  | -0.35503500 | -0.11874500 |
| H | 3.04375600  | 0.34083500  | -0.48810000 |
| H | 2.73411200  | -0.92027800 | 0.70131800  |
| H | 2.02251700  | -1.04604800 | -0.92230200 |
| C | -2.28896300 | -0.35562000 | 0.11813600  |
| H | -3.04348100 | 0.33878000  | 0.49023200  |
| H | -2.73421800 | -0.91854000 | -0.70331300 |
| H | -2.02124800 | -1.04896300 | 0.91934100  |

Cartesian coordinates of the optimized geometry for *i*-PrN=C=Ni-Pr at B3LYP-D3BJ/def2-TZVP level of theory (number of imaginary frequencies = 0):

|   |             |             |             |
|---|-------------|-------------|-------------|
| N | -1.16163100 | 0.55712800  | -0.35515100 |
| N | 1.16165000  | 0.55724600  | 0.35492800  |
| C | -0.00000200 | 0.48622800  | -0.00004300 |
| C | -2.27882700 | -0.22607800 | 0.18811700  |
| H | -1.91232200 | -0.88058300 | 0.98714400  |
| C | -2.86745100 | -1.08752800 | -0.92349800 |
| H | -3.21707600 | -0.45700300 | -1.74279000 |
| H | -3.71083600 | -1.66938000 | -0.54711500 |
| H | -2.12056400 | -1.77707200 | -1.31858100 |
| C | -3.31097900 | 0.73194000  | 0.77217300  |
| H | -2.87504600 | 1.33234800  | 1.57104200  |
| H | -4.15758600 | 0.17561600  | 1.17890200  |
| H | -3.67746000 | 1.40796200  | -0.00226600 |
| C | 2.27885300  | -0.22606300 | -0.18815200 |
| H | 1.91240100  | -0.88047400 | -0.98727400 |
| C | 2.86718500  | -1.08767100 | 0.92349800  |
| H | 3.71038100  | -1.66981000 | 0.54712700  |
| H | 2.12006400  | -1.77695900 | 1.31857800  |
| H | 3.21702100  | -0.45726400 | 1.74279200  |
| C | 3.31121400  | 0.73188800  | -0.77195900 |
| H | 4.15793000  | 0.17551900  | -1.17840800 |
| H | 3.67746200  | 1.40791700  | 0.00257100  |
| H | 2.87553800  | 1.33226600  | -1.57098700 |

Cartesian coordinates of the optimized geometry for **RS1** at B3LYP-D3BJ/def2-TZVP level of theory (number of imaginary frequencies = 0):

|    |             |             |             |
|----|-------------|-------------|-------------|
| Cl | 0.00000300  | 0.00017800  | -1.39219600 |
| P  | 0.00000800  | -0.00035100 | 2.33073900  |
| Ga | 1.47543700  | -0.00010300 | 0.64121800  |
| Ga | -1.47538100 | -0.00010500 | 0.64116800  |
| N  | 2.67788200  | 1.45120200  | 0.12498700  |
| N  | 2.67792300  | -1.45122800 | 0.12458700  |
| N  | -2.67786200 | 1.45120000  | 0.12501500  |
| N  | -2.67788800 | -1.45123700 | 0.12459500  |
| C  | 3.74612500  | 1.26225400  | -0.63579700 |
| C  | 4.22670400  | 0.00016500  | -1.00936300 |

|   |             |             |             |
|---|-------------|-------------|-------------|
| H | 5.10120800  | 0.00026500  | -1.64058200 |
| C | 3.74616500  | -1.26203900 | -0.63614000 |
| C | 4.50921300  | 2.46225100  | -1.13296900 |
| H | 3.85483300  | 3.13101200  | -1.69570000 |
| H | 5.33331800  | 2.16068800  | -1.77397100 |
| H | 4.91420800  | 3.03807100  | -0.29801300 |
| C | 4.50929500  | -2.46187700 | -1.13363000 |
| H | 5.33338200  | -2.16011500 | -1.77456200 |
| H | 3.85493800  | -3.13052100 | -1.69652600 |
| H | 4.91432300  | -3.03789500 | -0.29882600 |
| C | -3.74619200 | 1.26224900  | -0.63564500 |
| C | -4.22681300 | 0.00016000  | -1.00915600 |
| H | -5.10139300 | 0.00025900  | -1.64026900 |
| C | -3.74622200 | -1.26204500 | -0.63600200 |
| C | -4.50933800 | 2.46224400  | -1.13273300 |
| H | -3.85502400 | 3.13100500  | -1.69554000 |
| H | -4.91423900 | 3.03806600  | -0.29773200 |
| H | -5.33351600 | 2.16067800  | -1.77364000 |
| C | -4.50940300 | -2.46188300 | -1.13341700 |
| H | -5.33356700 | -2.16011800 | -1.77424700 |
| H | -4.91432600 | -3.03791400 | -0.29857200 |
| H | -3.85510800 | -3.13051500 | -1.69640000 |
| C | -2.24437500 | -2.79791100 | 0.47642600  |
| H | -1.88032300 | -3.34613800 | -0.39776900 |
| H | -1.42746800 | -2.71538900 | 1.19240200  |
| H | -3.04586600 | -3.37874700 | 0.93829400  |
| C | -2.24430900 | 2.79776500  | 0.47721500  |
| H | -3.04579000 | 3.37850800  | 0.93921700  |
| H | -1.42742300 | 2.71502200  | 1.19318900  |
| H | -1.88021400 | 3.34621000  | -0.39682600 |
| C | 2.24437300  | 2.79776500  | 0.47724700  |
| H | 1.88021300  | 3.34623100  | -0.39675300 |
| H | 1.42754400  | 2.71501900  | 1.19328600  |
| H | 3.04590000  | 3.37848900  | 0.93919400  |
| C | 2.24446600  | -2.79790100 | 0.47649200  |
| H | 1.42762600  | -2.71537600 | 1.19254400  |
| H | 1.88033700  | -3.34615500 | -0.39765400 |
| H | 3.04601300  | -3.37871200 | 0.93829500  |

Cartesian coordinates of the optimized geometry for **1** at B3LYP-D3BJ/def2-TZVP level of theory (number of imaginary frequencies = 0):

|    |             |             |             |
|----|-------------|-------------|-------------|
| Cl | 1.56549500  | 1.58878900  | 2.35197200  |
| P  | 0.03116000  | -0.71428500 | -0.59498800 |
| Ga | 1.72048700  | 0.40792800  | 0.45053800  |
| Ga | -1.94366600 | -0.24406100 | 0.19322400  |
| N  | 3.19467000  | -0.89323000 | 0.84253000  |
| N  | 2.89955900  | 1.59280200  | -0.66475200 |
| N  | -3.26851000 | -1.60217000 | -0.37982100 |
| N  | -3.28001000 | 0.95289400  | 0.94558700  |
| C  | 4.45837100  | -0.48143900 | 0.89056500  |
| C  | 4.90075000  | 0.73799000  | 0.37428100  |
| H  | 5.95223400  | 0.94254500  | 0.49821700  |
| C  | 4.20837600  | 1.63564200  | -0.44706000 |
| C  | 5.50887900  | -1.37552400 | 1.50115400  |
| H  | 5.32153700  | -1.49570200 | 2.56857800  |
| H  | 6.50031300  | -0.95102400 | 1.36635500  |
| H  | 5.48596800  | -2.37304200 | 1.06537700  |
| C  | 5.05298400  | 2.68814800  | -1.12297900 |
| H  | 6.09075000  | 2.36736700  | -1.17049900 |
| H  | 5.01117600  | 3.61691300  | -0.55333900 |
| H  | 4.69886900  | 2.90886600  | -2.12685200 |
| C  | 2.92768100  | -2.27445400 | 1.13154900  |
| C  | 2.72142900  | -2.70136800 | 2.45245500  |
| C  | 2.58053000  | -4.06658200 | 2.69394100  |
| H  | 2.42744500  | -4.41198000 | 3.70789900  |
| C  | 2.62954100  | -4.98724500 | 1.66127500  |

|   |             |             |             |
|---|-------------|-------------|-------------|
| H | 2.52570900  | -6.04461400 | 1.86992700  |
| C | 2.78579400  | -4.54673500 | 0.35712500  |
| H | 2.79963600  | -5.26691400 | -0.45012600 |
| C | 2.92932500  | -3.19259600 | 0.06656400  |
| C | 3.13149600  | -2.74873100 | -1.37049100 |
| H | 2.98810200  | -1.67099800 | -1.40066900 |
| C | 4.56437200  | -3.03071100 | -1.84154400 |
| H | 5.29726000  | -2.50002600 | -1.23348300 |
| H | 4.69651100  | -2.71139400 | -2.87701000 |
| H | 4.78873600  | -4.09832100 | -1.78548100 |
| C | 2.10661700  | -3.37329000 | -2.32025700 |
| H | 2.22396400  | -4.45664100 | -2.38893200 |
| H | 2.23544300  | -2.96823900 | -3.32560200 |
| H | 1.09100200  | -3.15541700 | -1.99394300 |
| C | 2.32002500  | 2.48910200  | -1.62332600 |
| C | 2.07859500  | 3.83150800  | -1.28740900 |
| C | 1.55595300  | 4.67348800  | -2.26827900 |
| H | 1.36753800  | 5.71151600  | -2.02724400 |
| C | 1.26765100  | 4.20651500  | -3.53790000 |
| H | 0.85960600  | 4.87592700  | -4.28467800 |
| C | 1.48943600  | 2.87325500  | -3.84695100 |
| H | 1.25081000  | 2.51335200  | -4.83752200 |
| C | 2.01686600  | 1.99365600  | -2.90567900 |
| C | 2.33950900  | 4.38928400  | 0.09989600  |
| H | 2.86076800  | 3.63231500  | 0.68250400  |
| C | 3.20149500  | 5.65797400  | 0.07554000  |
| H | 3.46294100  | 5.95066700  | 1.09425400  |
| H | 2.66632300  | 6.49451300  | -0.37807100 |
| H | 4.12558900  | 5.51868200  | -0.48645700 |
| C | 1.01460000  | 4.66815400  | 0.81263600  |
| H | 0.39582100  | 3.77684700  | 0.85904700  |
| H | 0.45471400  | 5.44833100  | 0.29289500  |
| H | 1.19095100  | 4.99887400  | 1.83771900  |
| C | 2.30558900  | 0.54985100  | -3.27460100 |
| H | 2.13122900  | -0.04720000 | -2.38123600 |
| C | 3.77059700  | 0.35593100  | -3.68830600 |
| H | 4.45754400  | 0.58741100  | -2.87623200 |
| H | 4.01826800  | 0.99548400  | -4.53873500 |
| H | 3.94494800  | -0.68043900 | -3.98314600 |
| C | 1.37234200  | 0.00389100  | -4.35340500 |
| H | 1.50750600  | -1.07405600 | -4.44601700 |
| H | 1.57543800  | 0.44466600  | -5.33198700 |
| H | 0.33157300  | 0.18847600  | -4.09795300 |
| C | -4.56225400 | -1.56757700 | -0.11072300 |
| C | -5.17237500 | -0.50630500 | 0.57109600  |
| H | -6.23707300 | -0.59169300 | 0.71830600  |
| C | -4.59105900 | 0.68167500  | 1.00228900  |
| C | -5.45496000 | -2.67699400 | -0.59684800 |
| H | -4.97613400 | -3.64765700 | -0.49214000 |
| H | -5.66778700 | -2.54106400 | -1.65916900 |
| H | -6.39901300 | -2.67363500 | -0.05697600 |
| C | -5.52305700 | 1.73628000  | 1.54150800  |
| H | -6.55150200 | 1.38750100  | 1.50554700  |
| H | -5.43838100 | 2.65301900  | 0.95771100  |
| H | -5.27356000 | 1.99872300  | 2.56907100  |
| C | -2.72325600 | -2.66533000 | -1.17710800 |
| C | -2.75997800 | -2.55337800 | -2.57477800 |
| C | -2.13805700 | -3.54758100 | -3.32601300 |
| H | -2.13868900 | -3.47807100 | -4.40577400 |
| C | -1.50893400 | -4.61924900 | -2.71211100 |
| H | -1.02194500 | -5.37686100 | -3.31251600 |
| C | -1.49467900 | -4.71555800 | -1.32994600 |
| H | -0.99376800 | -5.55019100 | -0.85808200 |
| C | -2.09457200 | -3.74189400 | -0.53565600 |
| C | -3.42121400 | -1.37521700 | -3.26998700 |
| H | -3.99165600 | -0.82042100 | -2.52547200 |
| C | -4.40548600 | -1.81970000 | -4.35755800 |
| H | -3.89166400 | -2.30917800 | -5.18645600 |

|   |             |             |             |
|---|-------------|-------------|-------------|
| H | -4.93435500 | -0.95525900 | -4.76374600 |
| H | -5.14573100 | -2.52081200 | -3.96789000 |
| C | -2.37213400 | -0.41397400 | -3.84054200 |
| H | -1.68478500 | -0.07998800 | -3.06362600 |
| H | -2.85332300 | 0.46136800  | -4.28310800 |
| H | -1.78233300 | -0.90493600 | -4.61685300 |
| C | -2.06917200 | -3.87183300 | 0.97596600  |
| H | -2.45146600 | -2.94180000 | 1.39718400  |
| C | -2.99249300 | -5.00218000 | 1.45168800  |
| H | -2.66186400 | -5.96500300 | 1.05670700  |
| H | -4.02393500 | -4.84762100 | 1.13130400  |
| H | -2.98394900 | -5.06562800 | 2.54181800  |
| C | -0.65008700 | -4.06554000 | 1.50880500  |
| H | -0.65002400 | -4.05185300 | 2.59989700  |
| H | 0.00775600  | -3.27411400 | 1.15463100  |
| H | -0.23046600 | -5.02066200 | 1.19337400  |
| C | -2.84456200 | 2.26637500  | 1.34227200  |
| C | -2.70110500 | 3.25246700  | 0.35698400  |
| C | -2.33244400 | 4.53241400  | 0.76570300  |
| H | -2.21499900 | 5.31201800  | 0.02502900  |
| C | -2.09730500 | 4.81587400  | 2.09929800  |
| H | -1.79760500 | 5.81258500  | 2.39572100  |
| C | -2.22791400 | 3.82017700  | 3.05614200  |
| H | -2.03565100 | 4.05499400  | 4.09322600  |
| C | -2.61290100 | 2.53092500  | 2.70184800  |
| C | -2.78564200 | 1.44246600  | 3.74747500  |
| H | -3.56361100 | 0.76508900  | 3.39188600  |
| C | -1.50655300 | 0.61498800  | 3.89263200  |
| H | -1.66166000 | -0.21275200 | 4.58734700  |
| H | -0.68313800 | 1.22833500  | 4.25705300  |
| H | -1.18112500 | 0.20175200  | 2.93834600  |
| C | -3.24272000 | 1.97174700  | 5.10838300  |
| H | -3.47816300 | 1.13587600  | 5.76927100  |
| H | -4.13238500 | 2.59845500  | 5.02116300  |
| H | -2.46345200 | 2.55931100  | 5.59647300  |
| C | -2.94336200 | 2.97148900  | -1.11612000 |
| H | -3.27897800 | 1.93893000  | -1.21450900 |
| C | -4.05639000 | 3.85719300  | -1.68912100 |
| H | -3.77833600 | 4.91222300  | -1.66060000 |
| H | -4.24990600 | 3.59291000  | -2.73056700 |
| H | -4.98788500 | 3.74308300  | -1.13174800 |
| C | -1.65157700 | 3.11636100  | -1.92566000 |
| H | -0.87424100 | 2.44581000  | -1.56038200 |
| H | -1.83012800 | 2.87901700  | -2.97574000 |
| H | -1.26636200 | 4.13431800  | -1.87448100 |
| C | 2.60834900  | -1.72126400 | 3.60300700  |
| H | 2.91195400  | -0.73953100 | 3.24438900  |
| C | 1.14341400  | -1.60594300 | 4.03748000  |
| H | 1.02885500  | -0.83113700 | 4.79640900  |
| H | 0.51111100  | -1.34558200 | 3.19113800  |
| H | 0.78559800  | -2.55238500 | 4.45048500  |
| C | 3.49940600  | -2.08310700 | 4.79545400  |
| H | 3.44775800  | -1.29716400 | 5.55136400  |
| H | 3.18358500  | -3.01504400 | 5.26844000  |
| H | 4.54358600  | -2.20025900 | 4.50090300  |

Cartesian coordinates of the optimized geometry for **RS2** at B3LYP-D3BJ/def2-TZVP level of theory (number of imaginary frequencies = 0):

|    |             |             |             |
|----|-------------|-------------|-------------|
| Cl | 0.87142800  | -2.09710200 | -1.63002300 |
| P  | 0.17845100  | 1.42019900  | -0.14733000 |
| Ga | 1.68133400  | -0.31741400 | -0.56119500 |
| Ga | -1.87274400 | 0.45763300  | 0.29628600  |
| N  | 3.22553800  | 0.30417100  | -1.57586300 |
| N  | 2.65379600  | -0.86039600 | 1.02889300  |
| N  | -3.50493900 | 1.41651900  | -0.11525100 |
| N  | -2.61667900 | -1.32045200 | 0.29505100  |

|   |             |             |             |
|---|-------------|-------------|-------------|
| C | 4.31670300  | 0.70849600  | -0.93842000 |
| C | 4.53925000  | 0.51346600  | 0.43064700  |
| H | 5.44096400  | 0.95301100  | 0.82588800  |
| C | 3.78538800  | -0.24542700 | 1.34030600  |
| C | 5.39446700  | 1.41500000  | -1.71780000 |
| H | 5.82776400  | 0.74957700  | -2.46798500 |
| H | 6.19078000  | 1.75046300  | -1.05908900 |
| H | 4.99068100  | 2.27911200  | -2.24899900 |
| C | 4.31285400  | -0.36384300 | 2.74350900  |
| H | 5.21252700  | 0.23216200  | 2.86991600  |
| H | 4.54942000  | -1.40051700 | 2.99194800  |
| H | 3.55661300  | -0.01772900 | 3.45082400  |
| C | -4.59702400 | 0.79640700  | -0.54374500 |
| C | -4.71766100 | -0.59633600 | -0.63703800 |
| H | -5.65161600 | -0.95980200 | -1.03491900 |
| C | -3.81539100 | -1.58087200 | -0.20968300 |
| C | -5.78853500 | 1.62175500  | -0.94975800 |
| H | -5.52844300 | 2.31133500  | -1.75548300 |
| H | -6.14241500 | 2.22718500  | -0.11271600 |
| H | -6.60401300 | 0.98738200  | -1.28569400 |
| C | -4.26319000 | -3.01453800 | -0.31198200 |
| H | -5.20441900 | -3.08671800 | -0.85007200 |
| H | -4.40380300 | -3.44758300 | 0.68096300  |
| H | -3.51486700 | -3.62028500 | -0.82542200 |
| O | -1.18727100 | 0.83102900  | 2.07127000  |
| C | 0.04983300  | 1.21561000  | 1.76981600  |
| O | 0.93354100  | 1.41027200  | 2.56747700  |
| C | -1.78183100 | -2.39331200 | 0.82896700  |
| H | -1.31346000 | -2.97431900 | 0.03281200  |
| H | -0.99272800 | -1.94712400 | 1.42875700  |
| H | -2.35179300 | -3.05907000 | 1.47810800  |
| C | -3.46788100 | 2.87118500  | -0.00323300 |
| H | -4.18691300 | 3.23635200  | 0.73415900  |
| H | -2.47395300 | 3.17447500  | 0.31899000  |
| H | -3.67276800 | 3.35974500  | -0.95880200 |
| C | 3.07274900  | 0.51641000  | -3.00833100 |
| H | 2.19900500  | -0.03343400 | -3.35275800 |
| H | 2.92800400  | 1.57430200  | -3.24907000 |
| H | 3.93412600  | 0.15065900  | -3.57080800 |
| C | 1.96695200  | -1.69427400 | 2.00681100  |
| H | 1.47815500  | -1.08841600 | 2.77361700  |
| H | 1.21265100  | -2.28219600 | 1.48782500  |
| H | 2.64889600  | -2.39527800 | 2.49035400  |

Cartesian coordinates of the optimized geometry for **10** at B3LYP-D3BJ/def2-TZVP level of theory (number of imaginary frequencies = 0):

|    |             |             |             |
|----|-------------|-------------|-------------|
| Cl | 1.53505000  | 0.90862400  | 2.68492000  |
| P  | 0.03398900  | -0.48770200 | -0.64690600 |
| Ga | 1.88376700  | 0.03220700  | 0.66521700  |
| Ga | -2.09240300 | 0.39491300  | -0.45416000 |
| N  | 2.83554500  | -1.66508000 | 1.08451100  |
| N  | 3.46416500  | 0.95968500  | -0.03482700 |
| N  | -3.49256800 | -0.89556600 | -0.91661000 |
| N  | -3.23462000 | 1.73889300  | 0.34337400  |
| C  | 4.12598400  | -1.62431500 | 1.38626500  |
| C  | 4.92367700  | -0.48183500 | 1.23553000  |
| H  | 5.93285400  | -0.57057200 | 1.60611700  |
| C  | 4.64881800  | 0.67874600  | 0.51121000  |
| C  | 4.82055300  | -2.85118500 | 1.91969500  |
| H  | 4.75377500  | -2.86220400 | 3.00879400  |
| H  | 5.87383000  | -2.83747600 | 1.64900800  |
| H  | 4.36549800  | -3.76783100 | 1.55437000  |
| C  | 5.78360600  | 1.65680500  | 0.34683700  |
| H  | 6.73666200  | 1.18417200  | 0.57028800  |
| H  | 5.63852800  | 2.48575700  | 1.04235600  |
| H  | 5.81578200  | 2.08040300  | -0.65344300 |



|   |             |             |             |
|---|-------------|-------------|-------------|
| C | 2.10519300  | -2.89818400 | 1.15589900  |
| C | 1.65207800  | -3.38838600 | 2.39175600  |
| C | 0.95925700  | -4.59890600 | 2.40347300  |
| H | 0.60866400  | -4.99659500 | 3.34688000  |
| C | 0.70092100  | -5.29178100 | 1.23424700  |
| H | 0.15473000  | -6.22621900 | 1.26558500  |
| C | 1.13333300  | -4.78099400 | 0.02011100  |
| H | 0.91257400  | -5.31789600 | -0.89085500 |
| C | 1.84461800  | -3.58723600 | -0.04463500 |
| C | 2.37008100  | -3.07501800 | -1.37259500 |
| H | 2.40172800  | -1.98910900 | -1.30688700 |
| C | 3.80543900  | -3.55524600 | -1.62491700 |
| H | 4.49120600  | -3.20489200 | -0.85448900 |
| H | 4.16529700  | -3.18125800 | -2.58510200 |
| H | 3.84810700  | -4.64650000 | -1.64746100 |
| C | 1.46638700  | -3.41748000 | -2.55572300 |
| H | 1.49223900  | -4.48288800 | -2.79508600 |
| H | 1.79962600  | -2.87530900 | -3.44157600 |
| H | 0.43552400  | -3.13459500 | -2.35299600 |
| C | 3.36655900  | 2.01889300  | -1.00590000 |
| C | 3.10319100  | 3.33165700  | -0.59326900 |
| C | 2.99694600  | 4.31930700  | -1.57194100 |
| H | 2.77851700  | 5.33705200  | -1.27612200 |
| C | 3.17237600  | 4.01969400  | -2.91096900 |
| H | 3.08445200  | 4.79877400  | -3.65754800 |
| C | 3.45210900  | 2.71812000  | -3.29811100 |
| H | 3.56804900  | 2.49251700  | -4.34823400 |
| C | 3.54370000  | 1.69313700  | -2.36343400 |
| C | 2.94766800  | 3.70788700  | 0.86814400  |
| H | 3.18751400  | 2.83565000  | 1.47262800  |
| C | 3.90333100  | 4.83635900  | 1.27637700  |
| H | 3.84579100  | 5.00504300  | 2.35364400  |
| H | 3.64731300  | 5.77482800  | 0.78093400  |
| H | 4.93824200  | 4.60328100  | 1.02179100  |
| C | 1.50377000  | 4.09378600  | 1.18981300  |
| H | 0.80848800  | 3.29565100  | 0.93811600  |
| H | 1.20735200  | 4.98440100  | 0.63420400  |
| H | 1.38887800  | 4.30045200  | 2.25437200  |
| C | 3.83521300  | 0.26726400  | -2.80344400 |
| H | 3.32749000  | -0.38973900 | -2.09765000 |
| C | 5.33535900  | -0.05775000 | -2.73598100 |
| H | 5.72687700  | -0.00652700 | -1.72269600 |
| H | 5.90432000  | 0.63778900  | -3.35725500 |
| H | 5.51807800  | -1.06807700 | -3.10748300 |
| C | 3.30327800  | -0.06677900 | -4.19873300 |
| H | 3.40745400  | -1.13878800 | -4.37899900 |
| H | 3.87255400  | 0.44344800  | -4.97904100 |
| H | 2.25473100  | 0.20398000  | -4.29154400 |
| C | -4.78092000 | -0.59063600 | -0.85159700 |
| C | -5.26408100 | 0.64109700  | -0.39104800 |
| H | -6.33422900 | 0.76493000  | -0.43440300 |
| C | -4.56240200 | 1.69001200  | 0.20593700  |
| C | -5.80391700 | -1.62525300 | -1.23580300 |
| H | -5.92596000 | -2.34058600 | -0.41966100 |
| H | -5.49272100 | -2.19218300 | -2.10966800 |
| H | -6.76738800 | -1.15853200 | -1.42582300 |
| C | -5.38453500 | 2.82041400  | 0.76625000  |
| H | -6.41575500 | 2.74253800  | 0.43246200  |
| H | -4.98017200 | 3.78682000  | 0.47242600  |
| H | -5.36943000 | 2.79286900  | 1.85699100  |
| C | -3.07998100 | -2.22612800 | -1.27572600 |
| C | -2.69290300 | -2.50209400 | -2.59616400 |
| C | -2.27001100 | -3.79630700 | -2.89462900 |
| H | -1.96908300 | -4.03290400 | -3.90625800 |
| C | -2.20923200 | -4.77692500 | -1.91874700 |
| H | -1.86268300 | -5.77121300 | -2.17016700 |
| C | -2.57937100 | -4.47909400 | -0.61762400 |
| H | -2.51002400 | -5.24297200 | 0.14477700  |

|   |             |             |             |
|---|-------------|-------------|-------------|
| C | -3.02741800 | -3.20699100 | -0.27322700 |
| C | -2.73340700 | -1.45398800 | -3.69340600 |
| H | -2.89619700 | -0.48375600 | -3.23028300 |
| C | -3.89325600 | -1.70893600 | -4.66560900 |
| H | -3.78881100 | -2.68032000 | -5.15406100 |
| H | -3.91053300 | -0.94140400 | -5.44188800 |
| H | -4.85879500 | -1.69277400 | -4.15821500 |
| C | -1.40451400 | -1.36840400 | -4.45214500 |
| H | -0.56375000 | -1.25418500 | -3.77150500 |
| H | -1.41036200 | -0.50497300 | -5.11810900 |
| H | -1.23037500 | -2.26004000 | -5.05829600 |
| C | -3.39175900 | -2.90115200 | 1.16786100  |
| H | -3.88454200 | -1.92979200 | 1.19700600  |
| C | -4.36953100 | -3.92266100 | 1.75827800  |
| H | -3.91410800 | -4.91053000 | 1.84391100  |
| H | -5.26571500 | -4.02314200 | 1.14355200  |
| H | -4.67591100 | -3.61477200 | 2.75986500  |
| C | -2.12616600 | -2.80228100 | 2.02323700  |
| H | -2.37219100 | -2.52583600 | 3.04897100  |
| H | -1.43485800 | -2.06003600 | 1.62536900  |
| H | -1.59559000 | -3.75304400 | 2.04233600  |
| C | -2.65217300 | 2.82790000  | 1.08645700  |
| C | -2.18903000 | 3.96462400  | 0.40594600  |
| C | -1.67366300 | 5.01194900  | 1.16765900  |
| H | -1.31804400 | 5.90187400  | 0.66616500  |
| C | -1.59232900 | 4.92806000  | 2.54624500  |
| H | -1.17280200 | 5.74760100  | 3.11534800  |
| C | -2.03884700 | 3.78883700  | 3.19730700  |
| H | -1.96509000 | 3.72848000  | 4.27448300  |
| C | -2.58964600 | 2.72684000  | 2.48652700  |
| C | -3.09323100 | 1.49652400  | 3.22135400  |
| H | -3.74688800 | 0.94462900  | 2.54597000  |
| C | -1.92789200 | 0.57175600  | 3.58233300  |
| H | -2.29076800 | -0.32965900 | 4.07891200  |
| H | -1.22363000 | 1.07187600  | 4.24799200  |
| H | -1.36568500 | 0.27618600  | 2.69805100  |
| C | -3.92088500 | 1.84216700  | 4.46326000  |
| H | -4.35906400 | 0.93501100  | 4.88355400  |
| H | -4.73143800 | 2.53409500  | 4.22723000  |
| H | -3.30936300 | 2.29918900  | 5.24264700  |
| C | -2.24793800 | 4.10167000  | -1.10533100 |
| H | -2.63221900 | 3.17321300  | -1.51956100 |
| C | -3.19678900 | 5.22974000  | -1.53142600 |
| H | -2.85369400 | 6.19828700  | -1.16185700 |
| H | -3.24659100 | 5.28609600  | -2.62048000 |
| H | -4.20971300 | 5.07140100  | -1.15741500 |
| C | -0.85372400 | 4.31282600  | -1.70650500 |
| H | -0.16177200 | 3.52973500  | -1.40715100 |
| H | -0.90863600 | 4.29593400  | -2.79527300 |
| H | -0.43031200 | 5.27223300  | -1.40170600 |
| C | 1.87831600  | -2.65634000 | 3.70311100  |
| H | 2.50964600  | -1.79143800 | 3.50782600  |
| C | 0.55744900  | -2.12322000 | 4.26851700  |
| H | 0.73918200  | -1.55529500 | 5.18278900  |
| H | 0.07036500  | -1.46010100 | 3.55984300  |
| H | -0.12550500 | -2.94206800 | 4.50424000  |
| C | 2.57847900  | -3.53852400 | 4.74531000  |
| H | 2.83318900  | -2.94724700 | 5.62695500  |
| H | 1.93147600  | -4.35447000 | 5.07291500  |
| H | 3.49434600  | -3.98378600 | 4.35618400  |
| O | -1.42384000 | 1.14139100  | -2.10908500 |
| C | -0.15068200 | 0.77242000  | -2.06836100 |
| O | 0.69372900  | 1.10776200  | -2.85807200 |

Cartesian coordinates of the optimized geometry for **RS6** at B3LYP-D3BJ/def2-TZVP level of theory (number of imaginary frequencies = 0):

|    |             |             |             |
|----|-------------|-------------|-------------|
| Ga | 2.30377600  | -0.00130400 | -0.30422600 |
| Ga | -2.50061300 | 0.00080200  | 0.25717100  |
| Cl | 1.32495500  | -0.00861200 | -2.30341100 |
| P  | 0.72448000  | 0.00449400  | 1.43736500  |
| O  | 0.44518400  | -2.56393000 | 0.87476700  |
| O  | -1.46989800 | -1.49849800 | 0.54598200  |
| O  | 0.44530300  | 2.56934700  | 0.85924500  |
| O  | -1.46938600 | 1.50186900  | 0.53496400  |
| N  | 3.57274700  | -1.46140800 | -0.21143300 |
| N  | 3.57190900  | 1.46020100  | -0.22191700 |
| N  | -3.31853000 | -0.00486400 | -1.46667900 |
| N  | -4.04863400 | 0.00481400  | 1.37811800  |
| C  | 4.76945900  | -1.26162900 | 0.32208700  |
| C  | 5.28824400  | 0.00293300  | 0.63987500  |
| H  | 6.26167900  | 0.00489500  | 1.10375100  |
| C  | 4.76867100  | 1.26490200  | 0.31312900  |
| C  | 5.65439700  | -2.45170500 | 0.58300100  |
| H  | 5.95176300  | -2.92368200 | -0.35611600 |
| H  | 5.12886300  | -3.20708800 | 1.16948700  |
| H  | 6.55421200  | -2.15451200 | 1.11484800  |
| C  | 5.65283000  | 2.45734200  | 0.56582500  |
| H  | 5.94958600  | 2.92334400  | -0.37645700 |
| H  | 6.55299900  | 2.16438600  | 1.09940900  |
| H  | 5.12683400  | 3.21619000  | 1.14742500  |
| C  | -4.63978100 | -0.00530200 | -1.59592800 |
| C  | -5.53840900 | -0.00167700 | -0.51771400 |
| H  | -6.58247600 | -0.00260500 | -0.78661900 |
| C  | -5.27190800 | 0.00300500  | 0.85734200  |
| C  | -5.22563000 | -0.00994200 | -2.98110400 |
| H  | -4.89552400 | 0.86593300  | -3.54313500 |
| H  | -6.31120000 | -0.01009900 | -2.94415700 |
| H  | -4.89504400 | -0.88926900 | -3.53743000 |
| C  | -6.45100600 | 0.00617100  | 1.79123900  |
| H  | -6.43131900 | 0.88656000  | 2.43687700  |
| H  | -6.43121200 | -0.86970800 | 2.44297800  |
| H  | -7.38532600 | 0.00418800  | 1.23731700  |
| C  | -0.18728900 | -1.53008200 | 0.86491400  |
| C  | -0.18712500 | 1.53542100  | 0.85506100  |
| C  | 3.15147400  | -2.79818300 | -0.62368000 |
| H  | 2.22850300  | -2.71687100 | -1.19016400 |
| H  | 3.90256300  | -3.27252400 | -1.25846200 |
| H  | 2.94753300  | -3.43748400 | 0.23660700  |
| C  | 3.14994800  | 2.79375800  | -0.64372800 |
| H  | 3.90086400  | 3.26397300  | -1.28177100 |
| H  | 2.22714600  | 2.70785900  | -1.20982800 |
| H  | 2.94549000  | 3.43905600  | 0.21194000  |
| C  | -2.44458800 | -0.00865700 | -2.64050200 |
| H  | -1.40545700 | -0.00696800 | -2.32020900 |
| H  | -2.60330200 | -0.89840500 | -3.25333800 |
| H  | -2.60424300 | 0.87643300  | -3.25978300 |
| C  | -3.84619600 | 0.00971600  | 2.82455500  |
| H  | -2.77828100 | 0.01011300  | 3.03406000  |
| H  | -4.27712400 | 0.89876400  | 3.29017300  |
| H  | -4.27764100 | -0.87586200 | 3.29626100  |

Cartesian coordinates of the optimized geometry for **13** at B3LYP-D3BJ/def2-TZVP level of theory (number of imaginary frequencies = 0):

|    |             |             |             |
|----|-------------|-------------|-------------|
| Ga | -2.47997200 | 0.56501200  | 0.58553500  |
| Ga | 2.66423700  | -0.47388800 | 0.20177000  |
| Cl | -2.05878900 | 1.55797600  | 2.51866200  |
| P  | -0.58765500 | -0.41342400 | -0.40237500 |
| O  | -0.63103200 | -1.86182700 | 1.84441800  |
| O  | 1.43671600  | -1.41986200 | 1.19489000  |
| O  | -0.01073500 | 2.10189500  | -1.10026800 |
| O  | 1.79471700  | 0.99523700  | -0.47057700 |
| N  | -3.94153400 | -0.71793900 | 0.89925800  |

|   |             |             |             |
|---|-------------|-------------|-------------|
| N | -3.51535400 | 1.82040800  | -0.51901200 |
| N | 4.21958700  | 0.03685500  | 1.17154300  |
| N | 3.45590400  | -1.59767200 | -1.14086700 |
| C | -5.20140300 | -0.30229500 | 0.85101300  |
| C | -5.59458800 | 0.94209100  | 0.34545400  |
| H | -6.65114900 | 1.14974400  | 0.40398300  |
| C | -4.83907200 | 1.87277200  | -0.37383100 |
| C | -6.30528900 | -1.19418900 | 1.35710700  |
| H | -6.44667300 | -1.01110700 | 2.42409900  |
| H | -6.06754600 | -2.24734200 | 1.23749500  |
| H | -7.24138500 | -0.97134500 | 0.85033800  |
| C | -5.60469300 | 2.98653000  | -1.04042500 |
| H | -5.35772100 | 3.94195500  | -0.57853200 |
| H | -6.67508700 | 2.82086000  | -0.95246100 |
| H | -5.33898800 | 3.07143500  | -2.09290300 |
| C | -3.63255300 | -2.08761700 | 1.21270000  |
| C | -3.42533500 | -2.97340500 | 0.14029000  |
| C | -3.07652800 | -4.28904500 | 0.43053400  |
| H | -2.90906800 | -4.98791900 | -0.37719400 |
| C | -2.94049600 | -4.71892800 | 1.74098500  |
| H | -2.66214200 | -5.74434600 | 1.94876800  |
| C | -3.15662200 | -3.83332800 | 2.78176900  |
| H | -3.03883900 | -4.17290100 | 3.80232700  |
| C | -3.50017200 | -2.50454200 | 2.54430500  |
| C | -3.63849300 | -2.53700300 | -1.29942600 |
| H | -3.53044600 | -1.45457800 | -1.33365900 |
| C | -5.06678300 | -2.85863200 | -1.76117100 |
| H | -5.81127000 | -2.37226400 | -1.13189800 |
| H | -5.24904800 | -3.93506600 | -1.72561000 |
| H | -5.22259200 | -2.51970000 | -2.78754600 |
| C | -2.61357600 | -3.12102300 | -2.27141700 |
| H | -1.59898400 | -2.85976200 | -1.97807700 |
| H | -2.78519200 | -2.72309200 | -3.27280200 |
| H | -2.68683800 | -4.20800700 | -2.33859800 |
| C | -3.69706800 | -1.56962900 | 3.72353400  |
| H | -3.96975300 | -0.58851600 | 3.33739200  |
| C | -4.82640700 | -2.05223500 | 4.64476500  |
| H | -5.01472800 | -1.31518900 | 5.42810400  |
| H | -4.56002800 | -2.99206000 | 5.13250000  |
| H | -5.75688600 | -2.21858300 | 4.10100400  |
| C | -2.40138800 | -1.39442900 | 4.52560900  |
| H | -1.59156000 | -1.05163100 | 3.88915700  |
| H | -2.09757400 | -2.33829200 | 4.98410300  |
| H | -2.55279100 | -0.66316700 | 5.32213300  |
| C | -2.89026800 | 2.73257700  | -1.44341500 |
| C | -2.63349900 | 2.28299500  | -2.74805500 |
| C | -2.09674700 | 3.18188100  | -3.66386400 |
| H | -1.89708200 | 2.85749300  | -4.67594700 |
| C | -1.79445100 | 4.48276900  | -3.29427800 |
| H | -1.37453500 | 5.16947800  | -4.01833800 |
| C | -2.00163600 | 4.89024500  | -1.98837400 |
| H | -1.72531500 | 5.89420400  | -1.69424600 |
| C | -2.54335200 | 4.02795900  | -1.03729200 |
| C | -2.90426200 | 0.84716600  | -3.15853500 |
| H | -2.92682700 | 0.25119200  | -2.24824600 |
| C | -4.27334300 | 0.68746700  | -3.83000100 |
| H | -5.08290800 | 0.98230600  | -3.16215500 |
| H | -4.44040800 | -0.35310500 | -4.11699000 |
| H | -4.33626100 | 1.30242100  | -4.73059100 |
| C | -1.78947600 | 0.27042700  | -4.03396200 |
| H | -1.76424300 | 0.73588000  | -5.02110600 |
| H | -1.94194100 | -0.79925400 | -4.17838100 |
| H | -0.81548700 | 0.40755900  | -3.56698000 |
| C | -2.66401600 | 4.49446800  | 0.40106400  |
| H | -3.17961900 | 3.72262700  | 0.96990600  |
| C | -3.46151500 | 5.79634400  | 0.54239500  |
| H | -3.58025400 | 6.04964400  | 1.59768900  |
| H | -4.45630800 | 5.71906600  | 0.10060000  |

|   |             |             |             |
|---|-------------|-------------|-------------|
| H | -2.95156800 | 6.63156600  | 0.05858400  |
| C | -1.26698900 | 4.65591000  | 1.01739600  |
| H | -0.72356700 | 5.46916100  | 0.53079000  |
| H | -0.68144700 | 3.74655000  | 0.90453500  |
| H | -1.34700500 | 4.88291500  | 2.08192500  |
| C | 5.36862300  | -0.61870900 | 0.99265900  |
| C | 5.56956900  | -1.59202600 | 0.01021800  |
| H | 6.55043900  | -2.04239000 | -0.00333500 |
| C | 4.71658300  | -1.99224400 | -1.03296200 |
| C | 6.53433800  | -0.26686700 | 1.87388500  |
| H | 6.95809100  | 0.69323900  | 1.57784600  |
| H | 7.31167700  | -1.02314700 | 1.80042800  |
| H | 6.21842400  | -0.16661000 | 2.91127500  |
| C | 5.31129900  | -2.91115100 | -2.06633000 |
| H | 6.22542700  | -2.47304300 | -2.46704900 |
| H | 4.62430900  | -3.11062500 | -2.88242200 |
| H | 5.58340000  | -3.85757300 | -1.59680300 |
| C | 4.14598900  | 1.20786600  | 2.00770400  |
| C | 4.59744000  | 2.43497600  | 1.48925600  |
| C | 4.48525300  | 3.56479100  | 2.29471900  |
| H | 4.82004700  | 4.52131200  | 1.91579200  |
| C | 3.93436100  | 3.48955400  | 3.56440500  |
| H | 3.85178300  | 4.38095800  | 4.17280200  |
| C | 3.47129400  | 2.27656300  | 4.04453700  |
| H | 3.02291700  | 2.22742300  | 5.02776900  |
| C | 3.55913300  | 1.11497000  | 3.27863100  |
| C | 5.14757200  | 2.57812800  | 0.07958200  |
| H | 5.24078500  | 1.58323500  | -0.35503200 |
| C | 4.17795700  | 3.37328900  | -0.80654100 |
| H | 4.07197200  | 4.39685600  | -0.44174700 |
| H | 3.19069400  | 2.91557800  | -0.82426600 |
| H | 4.55732200  | 3.42125500  | -1.82993600 |
| C | 6.54221400  | 3.21600100  | 0.06213800  |
| H | 6.51052900  | 4.24869900  | 0.41316100  |
| H | 6.93928400  | 3.22587600  | -0.95471100 |
| H | 7.24662800  | 2.67451900  | 0.69562800  |
| C | 3.01362800  | -0.18713200 | 3.83468500  |
| H | 3.09046300  | -0.94904600 | 3.06191800  |
| C | 1.52901700  | -0.06159700 | 4.19897300  |
| H | 1.38601100  | 0.58681400  | 5.06568800  |
| H | 1.11391400  | -1.04154900 | 4.43514400  |
| H | 0.94685500  | 0.35209800  | 3.37707800  |
| C | 3.83659300  | -0.67211400 | 5.03490800  |
| H | 4.88572500  | -0.81757800 | 4.77000200  |
| H | 3.44543300  | -1.62298800 | 5.40170800  |
| H | 3.79736700  | 0.04623400  | 5.85620200  |
| C | 2.59333600  | -1.95548400 | -2.23657800 |
| C | 2.45076200  | -1.04492200 | -3.29864900 |
| C | 1.55933000  | -1.36874300 | -4.31801900 |
| H | 1.42776000  | -0.68558700 | -5.14526900 |
| C | 0.82744800  | -2.54477000 | -4.28324900 |
| H | 0.13435000  | -2.77392700 | -5.08223100 |
| C | 0.96630700  | -3.41548400 | -3.21627900 |
| H | 0.37477600  | -4.32015200 | -3.18710200 |
| C | 1.83746000  | -3.13719900 | -2.16479000 |
| C | 3.26003700  | 0.23898300  | -3.37335200 |
| H | 3.63293300  | 0.46049400  | -2.37440500 |
| C | 2.43039000  | 1.44712600  | -3.81568000 |
| H | 1.56250700  | 1.59831500  | -3.17668200 |
| H | 2.08825600  | 1.34710000  | -4.84729400 |
| H | 3.04017100  | 2.35016800  | -3.76121200 |
| C | 4.48131100  | 0.05328900  | -4.28509000 |
| H | 5.08510400  | 0.96289600  | -4.30335100 |
| H | 4.16862900  | -0.16637700 | -5.30815200 |
| H | 5.11459500  | -0.76783100 | -3.94820900 |
| C | 1.94238800  | -4.10889500 | -1.00187600 |
| H | 2.51624100  | -3.62754500 | -0.21086800 |
| C | 0.57130500  | -4.46388400 | -0.41593400 |

|   |             |             |             |
|---|-------------|-------------|-------------|
| H | 0.69414500  | -5.05270300 | 0.49400500  |
| H | -0.01942100 | -5.05673100 | -1.11644200 |
| H | -0.00639500 | -3.58134600 | -0.15728900 |
| C | 2.68381900  | -5.38850900 | -1.41522500 |
| H | 3.67567100  | -5.17669000 | -1.81275500 |
| H | 2.12602200  | -5.92357000 | -2.18667400 |
| H | 2.79509400  | -6.05584400 | -0.55831200 |
| C | 0.12286700  | -1.30772300 | 1.08156600  |
| C | 0.48833100  | 1.09274500  | -0.66223800 |

Cartesian coordinates of the optimized geometry for **RS3** at B3LYP-D3BJ/def2-TZVP level of theory (number of imaginary frequencies = 0):

|    |             |             |             |
|----|-------------|-------------|-------------|
| Cl | 1.14727600  | -1.66660000 | 1.92489400  |
| P  | 0.13175600  | -0.28555400 | -1.52790400 |
| Ga | 1.78716800  | -0.55956600 | 0.07287900  |
| Ga | -1.87112400 | 0.06038800  | -0.39106400 |
| N  | 3.30357100  | -1.58987000 | -0.59475200 |
| N  | 2.77693100  | 1.02347900  | 0.61660200  |
| N  | -3.52458300 | -0.56923700 | -1.20308900 |
| N  | -2.44853900 | -0.08000600 | 1.45301300  |
| C  | 4.55361300  | -1.16741000 | -0.49163900 |
| C  | 4.91892800  | 0.08176800  | 0.02828000  |
| H  | 5.97623900  | 0.29343100  | 0.03283600  |
| C  | 4.09558800  | 1.10509900  | 0.51815400  |
| C  | 5.66683200  | -2.06383600 | -0.96823900 |
| H  | 5.63083100  | -3.03086400 | -0.46269300 |
| H  | 6.63640200  | -1.61017000 | -0.78197100 |
| H  | 5.57701600  | -2.25743100 | -2.03938400 |
| C  | 4.77367100  | 2.37779900  | 0.95286200  |
| H  | 5.84961500  | 2.30945700  | 0.81829500  |
| H  | 4.56729300  | 2.59137600  | 2.00362400  |
| H  | 4.40340200  | 3.22591000  | 0.37341200  |
| C  | -4.48554900 | -1.15441200 | -0.50313700 |
| C  | -4.47142900 | -1.26917600 | 0.89362900  |
| H  | -5.30720800 | -1.79296300 | 1.32934600  |
| C  | -3.54285900 | -0.74364500 | 1.80302800  |
| C  | -5.67217100 | -1.72743000 | -1.23149800 |
| H  | -5.35609700 | -2.47375900 | -1.96317100 |
| H  | -6.20337100 | -0.94705900 | -1.78063500 |
| H  | -6.36627000 | -2.19338500 | -0.53755200 |
| C  | -3.83234600 | -0.93827600 | 3.26761900  |
| H  | -4.71738700 | -1.55243200 | 3.40887600  |
| H  | -3.99725300 | 0.02143600  | 3.76226600  |
| H  | -2.98809900 | -1.41607900 | 3.76782000  |
| C  | -0.09783400 | 1.62704200  | -1.45342400 |
| O  | 0.69718300  | 2.46797800  | -1.83414300 |
| N  | -1.34631100 | 1.84694900  | -0.93899500 |
| C  | -1.86904200 | 3.20374300  | -0.87180200 |
| H  | -1.48132100 | 3.77255200  | -1.72043500 |
| H  | -2.95629500 | 3.15263800  | -0.97432000 |
| C  | -1.50755400 | 3.91965900  | 0.42710200  |
| H  | -1.93253700 | 4.92603100  | 0.44876700  |
| H  | -1.88849400 | 3.37231300  | 1.29193000  |
| H  | -0.42491900 | 4.00522600  | 0.52235600  |
| C  | 2.00810300  | 2.15506500  | 1.11996200  |
| H  | 2.30325900  | 2.42704900  | 2.13643000  |
| H  | 2.09993300  | 3.02541200  | 0.46871700  |
| H  | 0.95626300  | 1.88469000  | 1.13914600  |
| C  | 3.00408000  | -2.90292500 | -1.14957100 |
| H  | 1.92714600  | -2.99292000 | -1.28122200 |
| H  | 3.47009000  | -3.05260300 | -2.12570600 |
| H  | 3.32617400  | -3.70686600 | -0.48175800 |
| C  | -1.58505800 | 0.50140600  | 2.47642500  |
| H  | -2.14563100 | 1.15547700  | 3.14790600  |
| H  | -1.07136700 | -0.26381900 | 3.05865600  |
| H  | -0.82288700 | 1.10232800  | 1.98896200  |

|   |             |             |             |
|---|-------------|-------------|-------------|
| C | -3.61700400 | -0.46434600 | -2.65488800 |
| H | -2.74092200 | 0.06405800  | -3.02514100 |
| H | -3.64183600 | -1.44637900 | -3.13434900 |
| H | -4.50391800 | 0.09358000  | -2.96541900 |

Cartesian coordinates of the optimized geometry for **4** at B3LYP-D3BJ/def2-TZVP level of theory (number of imaginary frequencies = 0):

|    |             |             |             |
|----|-------------|-------------|-------------|
| Cl | -1.51423300 | 0.95822400  | -2.83290200 |
| P  | -0.14305800 | -0.71048700 | 0.39277200  |
| Ga | -1.88089300 | 0.34251500  | -0.71037600 |
| Ga | 2.06216700  | 0.00749300  | 0.36483700  |
| N  | -3.32016800 | -1.02009200 | -0.93597300 |
| N  | -3.08238700 | 1.71751900  | 0.01682300  |
| N  | 3.15978800  | -1.58544300 | 0.86885900  |
| N  | 3.46905000  | 0.93404700  | -0.59730000 |
| C  | -4.55504200 | -0.62367700 | -1.18836600 |
| C  | -4.96334800 | 0.71878200  | -1.11815400 |
| H  | -5.96643400 | 0.91708100  | -1.46288800 |
| C  | -4.31573500 | 1.78449400  | -0.49803000 |
| C  | -5.61637800 | -1.62255000 | -1.57104200 |
| H  | -5.68769400 | -1.67763700 | -2.65889700 |
| H  | -6.58580200 | -1.30897400 | -1.18921200 |
| H  | -5.38719200 | -2.61880000 | -1.20299800 |
| C  | -5.07392800 | 3.08481400  | -0.41696800 |
| H  | -6.13523900 | 2.92654400  | -0.59119200 |
| H  | -4.69498600 | 3.75903500  | -1.18786300 |
| H  | -4.93656300 | 3.58120200  | 0.53982200  |
| C  | -2.95951200 | -2.40750500 | -0.92404100 |
| C  | -2.72907100 | -3.09477900 | -2.12593900 |
| C  | -2.33474800 | -4.43138900 | -2.05211000 |
| H  | -2.15327100 | -4.97907600 | -2.96776700 |
| C  | -2.16486300 | -5.06405300 | -0.83417000 |
| H  | -1.85389400 | -6.10073500 | -0.79903000 |
| C  | -2.38300900 | -4.36479300 | 0.34372400  |
| H  | -2.22694400 | -4.85898600 | 1.29130600  |
| C  | -2.77882700 | -3.03238700 | 0.32538400  |
| C  | -3.03030600 | -2.27952400 | 1.61873600  |
| H  | -2.74039200 | -1.24273500 | 1.45153300  |
| C  | -4.52075300 | -2.27893400 | 1.98368000  |
| H  | -5.12814900 | -1.80969000 | 1.21060400  |
| H  | -4.68116800 | -1.72896100 | 2.91268100  |
| H  | -4.88175600 | -3.30005800 | 2.12608300  |
| C  | -2.18535900 | -2.77683000 | 2.78979800  |
| H  | -2.51605200 | -3.75583900 | 3.14515800  |
| H  | -2.26365200 | -2.07357100 | 3.61844800  |
| H  | -1.13616400 | -2.84603900 | 2.50891000  |
| C  | -2.62956500 | 2.75131200  | 0.90881300  |
| C  | -1.96051100 | 3.87270200  | 0.39766400  |
| C  | -1.50649200 | 4.83985000  | 1.29418000  |
| H  | -0.97599300 | 5.70466300  | 0.91766400  |
| C  | -1.73763100 | 4.71608100  | 2.65200600  |
| H  | -1.37887900 | 5.47441700  | 3.33649600  |
| C  | -2.42754700 | 3.61521600  | 3.13828400  |
| H  | -2.59671100 | 3.52826500  | 4.20148900  |
| C  | -2.88214800 | 2.61071300  | 2.28939400  |
| C  | -1.74804300 | 4.07429900  | -1.09017200 |
| H  | -2.29102300 | 3.29535100  | -1.61941200 |
| C  | -2.29251300 | 5.42550200  | -1.57064000 |
| H  | -2.22493800 | 5.48956900  | -2.65852900 |
| H  | -1.72201100 | 6.25823400  | -1.15472800 |
| H  | -3.33576600 | 5.56620300  | -1.28423700 |
| C  | -0.27526400 | 3.93238100  | -1.47109200 |
| H  | 0.13903300  | 2.98414600  | -1.13147500 |
| H  | 0.31705800  | 4.73513400  | -1.03276000 |
| H  | -0.15391100 | 3.97142400  | -2.55276900 |
| C  | -3.64840600 | 1.42024900  | 2.84835100  |

|   |             |             |             |
|---|-------------|-------------|-------------|
| H | -3.35443600 | 0.55395600  | 2.25815600  |
| C | -5.17012700 | 1.59110000  | 2.71241500  |
| H | -5.50097200 | 1.60580800  | 1.67775600  |
| H | -5.49763700 | 2.51681500  | 3.19166600  |
| H | -5.68021700 | 0.76044500  | 3.20439500  |
| C | -3.31756100 | 1.11113000  | 4.31025900  |
| H | -3.76407400 | 0.15345400  | 4.58503500  |
| H | -3.73534100 | 1.86328000  | 4.98404900  |
| H | -2.24521500 | 1.04093200  | 4.46626800  |
| C | 4.47492100  | -1.58242000 | 0.78588900  |
| C | 5.21505000  | -0.49604700 | 0.28560100  |
| H | 6.28677100  | -0.61267800 | 0.32771800  |
| C | 4.75920500  | 0.60326200  | -0.43399700 |
| C | 5.27813200  | -2.80302000 | 1.15610600  |
| H | 5.65731600  | -3.27201900 | 0.24611900  |
| H | 4.69439600  | -3.53857100 | 1.69823800  |
| H | 6.14123600  | -2.50904200 | 1.75336600  |
| C | 5.81305500  | 1.44094200  | -1.11182600 |
| H | 6.78672500  | 0.96672800  | -1.02518800 |
| H | 5.86699000  | 2.43112900  | -0.66269300 |
| H | 5.57896700  | 1.58488700  | -2.16555400 |
| C | 2.44713400  | -2.79199400 | 1.19589500  |
| C | 2.08565400  | -3.05829900 | 2.52567000  |
| C | 1.36355600  | -4.22146100 | 2.78678600  |
| H | 1.07630000  | -4.44813500 | 3.80431000  |
| C | 0.99428900  | -5.08375400 | 1.76837500  |
| H | 0.42062400  | -5.97383300 | 1.99254800  |
| C | 1.34810400  | -4.79593900 | 0.46136300  |
| H | 1.03983400  | -5.46106400 | -0.33381100 |
| C | 2.07947500  | -3.65373800 | 0.15053800  |
| C | 2.48356900  | -2.14855300 | 3.67352500  |
| H | 2.82285700  | -1.20825700 | 3.24257100  |
| C | 3.65211800  | -2.74140000 | 4.47447100  |
| H | 3.36933200  | -3.69817300 | 4.91888900  |
| H | 3.93703900  | -2.06590800 | 5.28385000  |
| H | 4.53041600  | -2.90983400 | 3.85229300  |
| C | 1.30888100  | -1.83828200 | 4.60711000  |
| H | 0.46414900  | -1.41207300 | 4.07079400  |
| H | 1.61876100  | -1.12026300 | 5.36897000  |
| H | 0.96873400  | -2.73459300 | 5.12899500  |
| C | 2.44347500  | -3.37459300 | -1.29570100 |
| H | 2.96112200  | -2.41775600 | -1.33686400 |
| C | 3.40519400  | -4.43417200 | -1.84790600 |
| H | 2.93135000  | -5.41733900 | -1.87338000 |
| H | 4.30444000  | -4.51598100 | -1.23617800 |
| H | 3.70700500  | -4.18133300 | -2.86641100 |
| C | 1.19613800  | -3.26048100 | -2.17381300 |
| H | 1.47204100  | -2.99583500 | -3.19524700 |
| H | 0.51523700  | -2.50217800 | -1.79146600 |
| H | 0.64351100  | -4.19939000 | -2.20984100 |
| C | 3.14088100  | 1.97784600  | -1.53314900 |
| C | 3.27592300  | 3.32267400  | -1.15553800 |
| C | 3.03494500  | 4.30267700  | -2.11586900 |
| H | 3.13511800  | 5.34579700  | -1.84757900 |
| C | 2.65306900  | 3.96396900  | -3.40110800 |
| H | 2.46482200  | 4.73879700  | -4.13312600 |
| C | 2.48061400  | 2.63190300  | -3.74425600 |
| H | 2.14987400  | 2.38469300  | -4.74165900 |
| C | 2.71799200  | 1.61244800  | -2.82599100 |
| C | 2.54110900  | 0.15325400  | -3.22520000 |
| H | 2.05500000  | -0.35352400 | -2.38677600 |
| C | 1.63436700  | -0.03707300 | -4.44131000 |
| H | 1.43409200  | -1.09914800 | -4.58294000 |
| H | 2.10998000  | 0.32593500  | -5.35509100 |
| H | 0.67995000  | 0.46859700  | -4.31344800 |
| C | 3.88313700  | -0.54930700 | -3.48130100 |
| H | 3.70870500  | -1.57624100 | -3.80771300 |
| H | 4.51379500  | -0.59000600 | -2.59664300 |



|   |             |             |             |
|---|-------------|-------------|-------------|
| H | 4.43447500  | -0.03654400 | -4.27266000 |
| C | 3.63145100  | 3.73732200  | 0.26155100  |
| H | 3.97410100  | 2.85201700  | 0.79666000  |
| C | 4.75147600  | 4.78263200  | 0.32005100  |
| H | 4.42541000  | 5.73886100  | -0.09209000 |
| H | 5.04534100  | 4.95778500  | 1.35656900  |
| H | 5.63689000  | 4.47094000  | -0.23561000 |
| C | 2.38761600  | 4.25698000  | 0.99041800  |
| H | 1.58507600  | 3.52288800  | 0.97846800  |
| H | 2.62269100  | 4.49009400  | 2.02990800  |
| H | 2.01620900  | 5.16725000  | 0.51692300  |
| C | -2.88604000 | -2.44680300 | -3.49080900 |
| H | -3.25460700 | -1.43269100 | -3.34776500 |
| C | -1.53861600 | -2.32905300 | -4.21106100 |
| H | -1.66767400 | -1.83047000 | -5.17366300 |
| H | -0.83641200 | -1.74128200 | -3.62695300 |
| H | -1.10254200 | -3.31362300 | -4.39262100 |
| C | -3.89076700 | -3.20445200 | -4.36941700 |
| H | -4.07224000 | -2.65401200 | -5.29475000 |
| H | -3.51179500 | -4.19129400 | -4.64216600 |
| H | -4.84587700 | -3.34895400 | -3.86411000 |
| C | 0.08427500  | 0.30186400  | 1.99637000  |
| O | -0.73651900 | 0.35087800  | 2.89819500  |
| N | 1.34703900  | 0.81635200  | 1.98799000  |
| C | 1.91489600  | 1.46470700  | 3.16996700  |
| H | 2.12892000  | 0.71950800  | 3.94288700  |
| H | 2.87809800  | 1.87632200  | 2.86022400  |
| C | 1.05692200  | 2.56996700  | 3.78060500  |
| H | 0.70997900  | 3.26768200  | 3.02205800  |
| H | 0.17990500  | 2.15410200  | 4.26739400  |
| H | 1.64407400  | 3.12387500  | 4.51756100  |

Cartesian coordinates of the optimized geometry for **RS7** at B3LYP-D3BJ/def2-TZVP level of theory (number of imaginary frequencies = 0):

|    |             |             |             |
|----|-------------|-------------|-------------|
| Ga | -2.40950400 | -0.00109100 | -0.23309000 |
| Ga | 2.32426700  | -0.11207400 | 0.25593400  |
| Cl | -1.46907600 | -0.25743500 | -2.24420700 |
| P  | -0.82498900 | 0.62571700  | 1.38745300  |
| O  | -0.49857700 | 2.73739100  | -0.13940200 |
| O  | -0.68087100 | -1.91786500 | 2.09430500  |
| N  | -3.90468400 | 1.22579800  | -0.36317900 |
| N  | -3.40923400 | -1.61960200 | 0.13183900  |
| N  | 3.07034800  | -0.98896900 | -1.28138200 |
| N  | 3.94568300  | 0.20053100  | 1.24520600  |
| C  | -5.10701000 | 0.88361900  | 0.07796700  |
| C  | -5.44177100 | -0.39330300 | 0.55116800  |
| H  | -6.45088500 | -0.50616800 | 0.91402800  |
| C  | -4.67232900 | -1.56612200 | 0.52677300  |
| C  | -6.20225900 | 1.91737600  | 0.06598800  |
| H  | -6.37935100 | 2.28160000  | -0.94795600 |
| H  | -5.92609400 | 2.78251500  | 0.67213400  |
| H  | -7.12972500 | 1.50350100  | 0.45198300  |
| C  | -5.35165300 | -2.84062000 | 0.95324500  |
| H  | -5.44788800 | -3.52847700 | 0.11021800  |
| H  | -6.34547900 | -2.63698700 | 1.34269400  |
| H  | -4.76829200 | -3.35194300 | 1.72072400  |
| C  | 4.36554800  | -1.26220200 | -1.37081300 |
| C  | 5.31385200  | -0.90865600 | -0.39892000 |
| H  | 6.32935300  | -1.20021200 | -0.61407000 |
| C  | 5.12453200  | -0.23133500 | 0.81301800  |
| C  | 4.86600700  | -1.99277900 | -2.58719600 |
| H  | 4.35516700  | -2.95089500 | -2.70022000 |
| H  | 5.93499600  | -2.17370600 | -2.51978300 |
| H  | 4.66754100  | -1.41689300 | -3.49351600 |
| C  | 6.34086900  | 0.01644600  | 1.66350000  |
| H  | 6.21756200  | -0.42500300 | 2.65443800  |

|   |             |             |             |
|---|-------------|-------------|-------------|
| H | 6.50123700  | 1.08707400  | 1.80757000  |
| H | 7.22952600  | -0.40621400 | 1.20348200  |
| C | 0.12174200  | 1.73335600  | 0.20805800  |
| C | -0.01209800 | -1.05549300 | 1.56568200  |
| N | 1.38826600  | 1.46204400  | -0.17799300 |
| C | 2.03535600  | 2.43825600  | -1.06530100 |
| H | 1.28886300  | 2.82192900  | -1.76071900 |
| H | 2.79371400  | 1.91055800  | -1.64951400 |
| C | 2.67589700  | 3.58849400  | -0.29737400 |
| H | 1.92015000  | 4.12236100  | 0.27793700  |
| H | 3.44002000  | 3.21897800  | 0.39005000  |
| H | 3.14903600  | 4.29403200  | -0.98403200 |
| O | 1.24334300  | -1.26562400 | 1.20931000  |
| C | 2.14065700  | -1.38996800 | -2.33706900 |
| H | 2.06671600  | -2.47750400 | -2.41306400 |
| H | 1.14943100  | -1.00115800 | -2.11364000 |
| H | 2.44014400  | -0.99394500 | -3.30953100 |
| C | 3.82170300  | 0.88831600  | 2.52685100  |
| H | 4.46707100  | 1.76750300  | 2.58260000  |
| H | 2.79387500  | 1.22485000  | 2.65011900  |
| H | 4.05991400  | 0.22828000  | 3.36447300  |
| C | -3.66214800 | 2.55910100  | -0.91083700 |
| H | -2.60375000 | 2.66853500  | -1.12716400 |
| H | -4.22979200 | 2.71756600  | -1.83180400 |
| H | -3.93002900 | 3.34139700  | -0.19749800 |
| C | -2.71921300 | -2.90197400 | 0.01851400  |
| H | -1.77255100 | -2.74623000 | -0.49234700 |
| H | -2.49775900 | -3.32622700 | 0.99801900  |
| H | -3.30113900 | -3.61527900 | -0.56873700 |

Cartesian coordinates of the optimized geometry for **7** at B3LYP-D3BJ/def2-TZVP level of theory (number of imaginary frequencies = 0):

|    |             |             |             |
|----|-------------|-------------|-------------|
| Ga | 2.56739700  | 0.64157700  | -0.57765700 |
| Ga | -2.52540600 | -0.54517100 | -0.33280500 |
| Cl | 2.30772400  | 1.52032800  | -2.59543500 |
| P  | 0.65223500  | -0.31846900 | 0.38322400  |
| O  | 0.96561200  | -1.68637800 | -1.86924600 |
| O  | -0.06507100 | 2.15664200  | 1.12382400  |
| N  | 4.08471100  | -0.61602100 | -0.71875200 |
| N  | 3.50742800  | 1.99089700  | 0.50733800  |
| N  | -4.13530000 | -0.03446800 | -1.24427300 |
| N  | -3.30418000 | -1.64002200 | 1.08024600  |
| C  | 5.32572100  | -0.15373200 | -0.63739400 |
| C  | 5.65224800  | 1.13743400  | -0.20653500 |
| H  | 6.70298100  | 1.37922600  | -0.23361200 |
| C  | 4.83326000  | 2.08555600  | 0.41341100  |
| C  | 6.48624200  | -1.03684500 | -1.01821500 |
| H  | 6.72829800  | -0.86703700 | -2.06927800 |
| H  | 6.25534200  | -2.09150400 | -0.90114300 |
| H  | 7.36587900  | -0.78859100 | -0.42830600 |
| C  | 5.52819300  | 3.27085600  | 1.03294500  |
| H  | 5.24738400  | 4.18665400  | 0.51352500  |
| H  | 6.60717200  | 3.15286000  | 0.97929300  |
| H  | 5.23217000  | 3.39980000  | 2.07302200  |
| C  | 3.82674900  | -2.01155400 | -0.94745400 |
| C  | 3.57727500  | -2.82242400 | 0.17431800  |
| C  | 3.24600100  | -4.15751200 | -0.03804300 |
| H  | 3.04689200  | -4.79958400 | 0.80867300  |
| C  | 3.17079000  | -4.67909100 | -1.32008200 |
| H  | 2.90499300  | -5.71835200 | -1.46761700 |
| C  | 3.44242400  | -3.86966900 | -2.40956000 |
| H  | 3.38392400  | -4.28354500 | -3.40771000 |
| C  | 3.77290800  | -2.52593200 | -2.25068400 |
| C  | 3.74390500  | -2.28717700 | 1.58695400  |
| H  | 3.64388800  | -1.20449100 | 1.54205300  |
| C  | 5.15618700  | -2.58536300 | 2.11092000  |

|   |             |             |             |
|---|-------------|-------------|-------------|
| H | 5.92236500  | -2.15727300 | 1.46566000  |
| H | 5.32687700  | -3.66303300 | 2.16383800  |
| H | 5.28864500  | -2.16900700 | 3.11169900  |
| C | 2.68909700  | -2.79546700 | 2.56895900  |
| H | 1.68586000  | -2.52851000 | 2.24363400  |
| H | 2.85349000  | -2.34753400 | 3.55016000  |
| H | 2.73799800  | -3.87836000 | 2.69707900  |
| C | 4.06098600  | -1.68353000 | -3.48035500 |
| H | 4.29193400  | -0.67157300 | -3.15096600 |
| C | 5.27201900  | -2.22598400 | -4.25378800 |
| H | 5.53015400  | -1.55082900 | -5.07232300 |
| H | 5.05234900  | -3.20349300 | -4.68805800 |
| H | 6.14854800  | -2.34124100 | -3.61589500 |
| C | 2.84613400  | -1.58537500 | -4.41105700 |
| H | 1.98637000  | -1.18496000 | -3.88323100 |
| H | 2.57936400  | -2.56757700 | -4.80870000 |
| H | 3.07827700  | -0.93159000 | -5.25432400 |
| C | 2.81455700  | 2.93468100  | 1.34791100  |
| C | 2.53019200  | 2.56177500  | 2.67088800  |
| C | 1.94320200  | 3.50133600  | 3.51142600  |
| H | 1.72243900  | 3.23657500  | 4.53632000  |
| C | 1.61145900  | 4.76480300  | 3.04897200  |
| H | 1.15085400  | 5.48339400  | 3.71506000  |
| C | 1.83831000  | 5.09109900  | 1.72378900  |
| H | 1.53644400  | 6.06282300  | 1.35574200  |
| C | 2.43544600  | 4.18707100  | 0.84734200  |
| C | 2.81422400  | 1.15871000  | 3.17428300  |
| H | 2.85993200  | 0.50988400  | 2.30159500  |
| C | 4.17235900  | 1.05885900  | 3.87829400  |
| H | 4.99057700  | 1.32140200  | 3.20747000  |
| H | 4.34644600  | 0.04066700  | 4.23339000  |
| H | 4.21143000  | 1.72968000  | 4.73955900  |
| C | 1.68941500  | 0.62051300  | 4.06165800  |
| H | 1.64032400  | 1.14230300  | 5.01934700  |
| H | 1.85053000  | -0.43683200 | 4.27149300  |
| H | 0.72391300  | 0.72045800  | 3.56825500  |
| C | 2.58070400  | 4.55812000  | -0.61590200 |
| H | 3.15685900  | 3.77934200  | -1.11204800 |
| C | 3.31058900  | 5.88918600  | -0.82842200 |
| H | 3.45272200  | 6.07156400  | -1.89543700 |
| H | 4.29226100  | 5.89791100  | -0.35162300 |
| H | 2.74109000  | 6.72813100  | -0.42399300 |
| C | 1.19779400  | 4.59310300  | -1.28221100 |
| H | 0.59076500  | 5.40105300  | -0.86744700 |
| H | 0.66327000  | 3.65886900  | -1.12433300 |
| H | 1.29856600  | 4.75167500  | -2.35726400 |
| C | -5.17917400 | -0.87294800 | -1.18121500 |
| C | -5.28440700 | -1.91813200 | -0.26349600 |
| H | -6.17700000 | -2.51991200 | -0.34514200 |
| C | -4.49087500 | -2.18375800 | 0.87503500  |
| C | -6.32452900 | -0.66001600 | -2.13369800 |
| H | -6.91121200 | 0.21330500  | -1.85115800 |
| H | -6.98029600 | -1.52726400 | -2.14236900 |
| H | -5.95017700 | -0.47448600 | -3.14078000 |
| C | -5.08182600 | -3.13282800 | 1.88270300  |
| H | -6.10513500 | -2.83830100 | 2.11341200  |
| H | -4.50269000 | -3.16890600 | 2.79986100  |
| H | -5.12001000 | -4.13638600 | 1.45550500  |
| C | -4.29732700 | 1.26093600  | -1.85884300 |
| C | -5.05542200 | 2.23341700  | -1.18061000 |
| C | -5.25198500 | 3.46731300  | -1.79515700 |
| H | -5.83681800 | 4.22332500  | -1.28806500 |
| C | -4.68858500 | 3.75626200  | -3.02680500 |
| H | -4.84899000 | 4.72337800  | -3.48557200 |
| C | -3.89413900 | 2.81128200  | -3.65179100 |
| H | -3.42402700 | 3.04919600  | -4.59649900 |
| C | -3.68228500 | 1.55601000  | -3.08553700 |
| C | -5.58382600 | 2.03201200  | 0.22904100  |

|   |             |             |             |
|---|-------------|-------------|-------------|
| H | -5.36366900 | 1.01253500  | 0.54128500  |
| C | -4.84554200 | 2.97578700  | 1.18718900  |
| H | -5.04844000 | 4.01870000  | 0.93811600  |
| H | -3.76840300 | 2.82079500  | 1.13476500  |
| H | -5.17488300 | 2.80867800  | 2.21357900  |
| C | -7.10022400 | 2.22678000  | 0.33703200  |
| H | -7.38991600 | 3.24735900  | 0.08131100  |
| H | -7.43179000 | 2.03542400  | 1.35945600  |
| H | -7.64583900 | 1.55174200  | -0.32350400 |
| C | -2.75618800 | 0.58000500  | -3.77498200 |
| H | -2.85221300 | -0.36952300 | -3.26069700 |
| C | -1.29964400 | 1.04679400  | -3.64576300 |
| H | -1.13920100 | 1.97610600  | -4.19514200 |
| H | -0.60905200 | 0.30097400  | -4.04022000 |
| H | -1.02672800 | 1.23365600  | -2.60825100 |
| C | -3.13213100 | 0.32798900  | -5.23802300 |
| H | -4.16667800 | -0.00834800 | -5.33095800 |
| H | -2.48392100 | -0.44050600 | -5.66352200 |
| H | -3.01678400 | 1.22694900  | -5.84566200 |
| C | -2.51553200 | -1.86562000 | 2.26626100  |
| C | -2.49076800 | -0.86412200 | 3.25533500  |
| C | -1.67868600 | -1.06008600 | 4.36870800  |
| H | -1.64101200 | -0.30247400 | 5.13737700  |
| C | -0.90890000 | -2.20289700 | 4.50650600  |
| H | -0.27915600 | -2.33140700 | 5.37720000  |
| C | -0.93619100 | -3.16956500 | 3.51952700  |
| H | -0.32162400 | -4.05305700 | 3.62387400  |
| C | -1.72409600 | -3.02125000 | 2.37899000  |
| C | -3.35635700 | 0.37929900  | 3.16347500  |
| H | -3.55379100 | 0.57256100  | 2.11164700  |
| C | -2.66950900 | 1.62743300  | 3.72222700  |
| H | -1.71455400 | 1.80978800  | 3.23053300  |
| H | -2.50106700 | 1.55278000  | 4.79778000  |
| H | -3.29817900 | 2.50123900  | 3.55643700  |
| C | -4.70822600 | 0.13660500  | 3.84932100  |
| H | -5.34642400 | 1.01790100  | 3.76280900  |
| H | -4.56914200 | -0.07826000 | 4.91103800  |
| H | -5.23750200 | -0.70717600 | 3.40513200  |
| C | -1.68183800 | -4.11302900 | 1.32606500  |
| H | -2.27295900 | -3.78267300 | 0.47305600  |
| C | -0.25087800 | -4.36158100 | 0.83782200  |
| H | -0.23962800 | -5.12190700 | 0.05736600  |
| H | 0.38241500  | -4.71629600 | 1.65083600  |
| H | 0.20226000  | -3.46009900 | 0.43346100  |
| C | -2.28813000 | -5.42371800 | 1.84799600  |
| H | -3.29927100 | -5.28594000 | 2.22852900  |
| H | -1.68359300 | -5.83201100 | 2.66011300  |
| H | -2.32073900 | -6.16928500 | 1.05086600  |
| C | 0.08199200  | -1.24969000 | -1.14210300 |
| C | -0.49002400 | 1.14193600  | 0.62552000  |
| N | -1.23532400 | -1.51197300 | -1.32111500 |
| C | -1.58571600 | -2.33924300 | -2.48843100 |
| H | -1.09902700 | -1.92087100 | -3.37127300 |
| H | -2.66361200 | -2.25740600 | -2.63621100 |
| C | -1.21277900 | -3.81068100 | -2.37028400 |
| H | -0.14648200 | -3.92498000 | -2.19101600 |
| H | -1.76431800 | -4.29587500 | -1.56617500 |
| H | -1.46276600 | -4.31976300 | -3.30397300 |
| O | -1.77444900 | 0.98930400  | 0.34607500  |

Cartesian coordinates of the optimized geometry for **RS4** at B3LYP-D3BJ/def2-TZVP level of theory (number of imaginary frequencies = 0):

|    |             |             |             |
|----|-------------|-------------|-------------|
| Ga | 1.58620300  | 0.61321500  | -0.23742200 |
| Ga | -1.94403900 | -0.42110900 | -0.09481900 |
| Cl | 0.86537600  | 2.61222100  | 0.50401100  |
| P  | 0.01309600  | -0.67082900 | -1.35379000 |

|   |             |             |             |
|---|-------------|-------------|-------------|
| N | 2.57079600  | -0.25008300 | 1.20711400  |
| N | 3.12569800  | 1.03715100  | -1.36340300 |
| N | -3.63799800 | -0.53886100 | -1.05530400 |
| N | -2.56142900 | 0.82096800  | 1.26103100  |
| N | -1.21324600 | -2.07294700 | 0.55521000  |
| N | 0.82703900  | -3.08973200 | 0.03072100  |
| C | 3.89400400  | -0.31262800 | 1.22779300  |
| C | 4.72777800  | 0.19362800  | 0.22142000  |
| H | 5.78609300  | 0.07585800  | 0.39121900  |
| C | 4.37338600  | 0.81454400  | -0.98460800 |
| C | 4.56803200  | -0.98020300 | 2.39815100  |
| H | 5.64914400  | -0.91840800 | 2.30947300  |
| H | 4.28514300  | -2.03360400 | 2.45429000  |
| H | 4.26711700  | -0.51698300 | 3.33965200  |
| C | 5.49789900  | 1.23704000  | -1.89412300 |
| H | 6.46285400  | 1.03603700  | -1.43689000 |
| H | 5.43434300  | 2.30285900  | -2.12191800 |
| H | 5.44906000  | 0.70184300  | -2.84498700 |
| C | -4.58686800 | 0.37629200  | -0.92565900 |
| C | -4.55315700 | 1.39865600  | 0.03327100  |
| H | -5.37251100 | 2.09909300  | 0.00307100  |
| C | -3.63550300 | 1.57826800  | 1.07774200  |
| C | -5.78103800 | 0.32556900  | -1.84138200 |
| H | -5.47133300 | 0.35441800  | -2.88794400 |
| H | -6.45100800 | 1.15996900  | -1.65274600 |
| H | -6.33819800 | -0.60296000 | -1.69847200 |
| C | -3.91726800 | 2.68834100  | 2.05548900  |
| H | -3.04362400 | 3.33196400  | 2.17085300  |
| H | -4.15623700 | 2.28669800  | 3.04280900  |
| H | -4.75764600 | 3.29117500  | 1.72202800  |
| C | -0.02447100 | -2.15892200 | -0.13911700 |
| C | -3.74851000 | -1.59444300 | -2.05483800 |
| H | -3.72585300 | -1.19628700 | -3.07298500 |
| H | -2.90386400 | -2.27137600 | -1.94269300 |
| H | -4.66512800 | -2.17628900 | -1.93211700 |
| C | -1.71970300 | 1.00435300  | 2.43943600  |
| H | -1.07539200 | 0.13421800  | 2.53911000  |
| H | -1.08013200 | 1.88359900  | 2.34540600  |
| H | -2.31427400 | 1.08208700  | 3.35081900  |
| C | 1.79316800  | -0.82127000 | 2.30056500  |
| H | 2.04705700  | -1.86640400 | 2.47931400  |
| H | 1.92653300  | -0.25499300 | 3.22694300  |
| H | 0.74132400  | -0.79711400 | 2.03286400  |
| C | 2.83751700  | 1.68870100  | -2.63407000 |
| H | 3.12147900  | 2.74471800  | -2.61981300 |
| H | 3.34530100  | 1.20274700  | -3.46979300 |
| H | 1.76680400  | 1.63396000  | -2.82277500 |
| C | -1.56297400 | -3.12062300 | 1.49226000  |
| H | -1.61053400 | -4.09970800 | 1.00501800  |
| H | -0.82644900 | -3.20544900 | 2.29876600  |
| H | -2.53710300 | -2.89613100 | 1.92891500  |
| C | 2.04995000  | -3.10860500 | -0.73079300 |
| H | 2.10508000  | -2.31771800 | -1.49254600 |
| H | 2.91403700  | -2.99380200 | -0.06740200 |
| H | 2.16354800  | -4.07229800 | -1.23609500 |

Cartesian coordinates of the optimized geometry for **12** at B3LYP-D3BJ/def2-TZVP level of theory (number of imaginary frequencies = 0):

|    |             |             |             |
|----|-------------|-------------|-------------|
| Ga | -1.87698600 | -0.18671800 | 0.21768900  |
| Ga | 2.28363500  | 0.21095300  | 0.04361200  |
| Cl | -1.89589700 | -0.35774500 | -2.00075400 |
| P  | 0.14064800  | 0.77372400  | 0.73965600  |
| N  | -2.78050900 | -1.75996400 | 0.96562800  |
| N  | -3.31179800 | 1.11922700  | 0.73894300  |
| N  | 3.13209200  | 1.79056500  | -0.78123500 |
| N  | 3.35270700  | -1.13783200 | -0.90691200 |

|   |             |             |             |
|---|-------------|-------------|-------------|
| N | 2.33601700  | 0.12791400  | 1.97177500  |
| N | 0.58184900  | 0.06609700  | 3.51429300  |
| C | -3.70422000 | -1.64138000 | 1.92203300  |
| C | -4.30271400 | -0.43944300 | 2.28588200  |
| H | -5.03047800 | -0.50256600 | 3.08039500  |
| C | -4.20090200 | 0.81880900  | 1.67016700  |
| C | -4.13653800 | -2.86879400 | 2.68178500  |
| H | -5.08625800 | -2.69771400 | 3.18219500  |
| H | -3.38624700 | -3.09904400 | 3.44047500  |
| H | -4.21912200 | -3.74135700 | 2.03910100  |
| C | -5.20938600 | 1.83663200  | 2.14273700  |
| H | -6.21228800 | 1.41519100  | 2.08069900  |
| H | -5.17505500 | 2.75837000  | 1.57277000  |
| H | -5.02020600 | 2.06454200  | 3.19258000  |
| C | -2.42981200 | -3.06347400 | 0.47304200  |
| C | -3.15661000 | -3.58096900 | -0.61626300 |
| C | -2.82300800 | -4.84918100 | -1.08371200 |
| H | -3.36961200 | -5.26963700 | -1.91662800 |
| C | -1.79109800 | -5.57737500 | -0.51001600 |
| H | -1.53934200 | -6.55681700 | -0.89680600 |
| C | -1.07893900 | -5.04586800 | 0.55091700  |
| H | -0.26711800 | -5.61189800 | 0.98740100  |
| C | -1.38918600 | -3.78930300 | 1.06994700  |
| C | -4.30514500 | -2.81230100 | -1.24772600 |
| H | -4.17246300 | -1.76312200 | -0.99446400 |
| C | -5.65733900 | -3.25710900 | -0.67315100 |
| H | -6.46942800 | -2.69443600 | -1.13877300 |
| H | -5.71350600 | -3.09358600 | 0.40236200  |
| H | -5.82939800 | -4.31922400 | -0.86209800 |
| C | -4.31537100 | -2.90660600 | -2.77495600 |
| H | -4.55996000 | -3.91318000 | -3.11985200 |
| H | -3.35022700 | -2.62105000 | -3.18910700 |
| H | -5.07056200 | -2.23103400 | -3.18070100 |
| C | -0.60659200 | -3.25725000 | 2.25372300  |
| H | -1.03421200 | -2.29831400 | 2.53934200  |
| C | -0.68658300 | -4.18884400 | 3.46945200  |
| H | -1.71670700 | -4.41957900 | 3.74340500  |
| H | -0.19956800 | -3.72090400 | 4.32687800  |
| H | -0.17850900 | -5.13529200 | 3.27420100  |
| C | 0.85169200  | -3.01387600 | 1.87367000  |
| H | 1.34504500  | -3.94331800 | 1.59193200  |
| H | 1.38722400  | -2.56436600 | 2.70822900  |
| H | 0.91749500  | -2.33247800 | 1.03013700  |
| C | -3.32142800 | 2.40192500  | 0.08390700  |
| C | -4.00599100 | 2.52297000  | -1.14096400 |
| C | -3.96552800 | 3.74814600  | -1.80137200 |
| H | -4.48225500 | 3.85948600  | -2.74439300 |
| C | -3.26898000 | 4.82441900  | -1.27620400 |
| H | -3.23899800 | 5.76502800  | -1.81158700 |
| C | -2.61445700 | 4.69318400  | -0.06435900 |
| H | -2.07700100 | 5.53726800  | 0.34560200  |
| C | -2.63121200 | 3.49306600  | 0.64544300  |
| C | -4.83230200 | 1.38532600  | -1.71705500 |
| H | -4.45749500 | 0.45738600  | -1.29232600 |
| C | -6.30731300 | 1.51928800  | -1.31174300 |
| H | -6.88743100 | 0.68549000  | -1.71343100 |
| H | -6.73246000 | 2.44673500  | -1.70200200 |
| H | -6.43231900 | 1.52502900  | -0.23044400 |
| C | -4.71494300 | 1.26627300  | -3.23830600 |
| H | -5.19469900 | 0.34513600  | -3.57353400 |
| H | -3.67304000 | 1.23559200  | -3.55011000 |
| H | -5.20943400 | 2.09502300  | -3.74894100 |
| C | -1.97026400 | 3.44625200  | 2.01263400  |
| H | -1.93069900 | 2.40669300  | 2.32913600  |
| C | -2.78859500 | 4.23306100  | 3.04929200  |
| H | -3.82086400 | 3.89649400  | 3.11138400  |
| H | -2.80265100 | 5.29562400  | 2.79740400  |
| H | -2.33654100 | 4.13043100  | 4.03811500  |

|   |             |             |             |
|---|-------------|-------------|-------------|
| C | -0.53708500 | 3.98261500  | 2.00018000  |
| H | -0.51516900 | 5.05957000  | 1.82754300  |
| H | 0.05949600  | 3.49814200  | 1.23390700  |
| H | -0.06453500 | 3.79382600  | 2.96565500  |
| C | 4.22477300  | 1.71393900  | -1.52896800 |
| C | 4.81491200  | 0.50642400  | -1.91884100 |
| H | 5.68342200  | 0.59945900  | -2.55057100 |
| C | 4.37850600  | -0.79983300 | -1.69507600 |
| C | 4.88463900  | 2.97761700  | -2.01692300 |
| H | 4.15739100  | 3.67389400  | -2.42916300 |
| H | 5.63551100  | 2.75205800  | -2.76968100 |
| H | 5.36998000  | 3.48630400  | -1.18369800 |
| C | 5.09903600  | -1.86582200 | -2.48702200 |
| H | 5.20105000  | -2.80277800 | -1.95181100 |
| H | 6.08220700  | -1.51097200 | -2.78664800 |
| H | 4.52506500  | -2.07690500 | -3.39092100 |
| C | 2.51895500  | 3.07899800  | -0.59116700 |
| C | 1.49539300  | 3.46759900  | -1.47611700 |
| C | 0.99092600  | 4.76001800  | -1.36189800 |
| H | 0.20224500  | 5.08308600  | -2.02494000 |
| C | 1.46812000  | 5.63553100  | -0.39818600 |
| H | 1.06740500  | 6.63917500  | -0.33290800 |
| C | 2.42038400  | 5.20814200  | 0.50845000  |
| H | 2.74890000  | 5.87723300  | 1.29280700  |
| C | 2.95101900  | 3.92006600  | 0.44274900  |
| C | 0.94014200  | 2.51501100  | -2.52372400 |
| H | 0.98823700  | 1.50870600  | -2.10368200 |
| C | 1.76839000  | 2.51261700  | -3.81596200 |
| H | 1.31306200  | 1.84272800  | -4.54788500 |
| H | 2.79000800  | 2.17405200  | -3.65304700 |
| H | 1.80531800  | 3.51407800  | -4.25120100 |
| C | -0.52971500 | 2.78715300  | -2.84324700 |
| H | -0.92615400 | 1.98055300  | -3.45761200 |
| H | -0.65912100 | 3.72031800  | -3.39510200 |
| H | -1.13128100 | 2.83940000  | -1.93849900 |
| C | 3.92327100  | 3.46483000  | 1.51524300  |
| H | 4.25105900  | 2.45536000  | 1.26787600  |
| C | 5.16766900  | 4.35568600  | 1.60875000  |
| H | 4.90582100  | 5.37057700  | 1.91344400  |
| H | 5.69540300  | 4.42414100  | 0.65682100  |
| H | 5.86184500  | 3.95705100  | 2.35114200  |
| C | 3.20974200  | 3.40165800  | 2.87233600  |
| H | 2.34779500  | 2.73903400  | 2.83018700  |
| H | 2.86352400  | 4.39214800  | 3.17367900  |
| H | 3.88903100  | 3.03418900  | 3.64324300  |
| C | 3.06067300  | -2.54161400 | -0.76920500 |
| C | 2.06613400  | -3.12669800 | -1.57429100 |
| C | 1.91361800  | -4.51059200 | -1.50216400 |
| H | 1.15638500  | -4.99459500 | -2.09798200 |
| C | 2.70459600  | -5.28468800 | -0.66774800 |
| H | 2.57311900  | -6.35910800 | -0.64377600 |
| C | 3.63097500  | -4.67959400 | 0.16196300  |
| H | 4.21122600  | -5.28513200 | 0.84455900  |
| C | 3.81235600  | -3.29810800 | 0.14575500  |
| C | 1.13822700  | -2.29416400 | -2.45367100 |
| H | 0.76373300  | -1.47540200 | -1.83141400 |
| C | 1.81397100  | -1.65707200 | -3.67682600 |
| H | 2.27504500  | -2.42114600 | -4.30739700 |
| H | 2.56885000  | -0.92228500 | -3.41096900 |
| H | 1.05927300  | -1.14282500 | -4.27392900 |
| C | -0.08450500 | -3.08033300 | -2.92475600 |
| H | -0.63128000 | -3.52150500 | -2.09459000 |
| H | 0.19683000  | -3.87676600 | -3.61820800 |
| H | -0.76321900 | -2.41015200 | -3.44638500 |
| C | 4.78867400  | -2.65893300 | 1.12100200  |
| H | 4.52799700  | -1.60523400 | 1.19134500  |
| C | 6.25126500  | -2.74345300 | 0.66090400  |
| H | 6.90971200  | -2.35483200 | 1.44046400  |

|   |             |             |             |
|---|-------------|-------------|-------------|
| H | 6.43515500  | -2.16601300 | -0.24234000 |
| H | 6.53760600  | -3.77960200 | 0.46615300  |
| C | 4.66155900  | -3.25931200 | 2.52615800  |
| H | 3.62533600  | -3.28232600 | 2.85837200  |
| H | 5.23572500  | -2.66362800 | 3.23709400  |
| H | 5.05314900  | -4.27750400 | 2.56410200  |
| C | 1.00664200  | 0.22688700  | 2.32359900  |
| C | 3.31379900  | -0.04312100 | 3.02517300  |
| H | 3.24543800  | -1.02862000 | 3.49355600  |
| H | 4.31637300  | 0.07858000  | 2.61362700  |
| H | 3.16704400  | 0.69243900  | 3.81859100  |
| C | -0.81142800 | 0.23476500  | 3.82227900  |
| H | -1.45231000 | 0.34734900  | 2.93691400  |
| H | -1.18071400 | -0.62545500 | 4.38880800  |
| H | -0.96691600 | 1.11843000  | 4.45083000  |

Cartesian coordinates of the optimized geometry for **RS8** at B3LYP-D3BJ/def2-TZVP level of theory (number of imaginary frequencies = 0):

|    |             |             |             |
|----|-------------|-------------|-------------|
| Ga | -2.20042100 | -0.47646900 | 0.02499400  |
| Ga | 2.36625400  | -0.01785700 | -0.20617000 |
| Cl | -1.29910800 | -2.06139700 | 1.30428900  |
| P  | -0.74707400 | 0.40262200  | -1.59004000 |
| N  | -2.96697700 | 0.81025300  | 1.25713400  |
| N  | -3.84419300 | -1.13340100 | -0.76389700 |
| N  | 3.99044000  | 0.59717300  | -1.05040400 |
| N  | 3.14463200  | -0.91265100 | 1.30570700  |
| N  | 1.19125100  | 1.37557900  | 0.23343700  |
| N  | -0.49559800 | 2.83374000  | -0.31760800 |
| C  | -4.26248100 | 1.09270300  | 1.25123700  |
| C  | -5.20309000 | 0.46773200  | 0.42124100  |
| H  | -6.21806400 | 0.81682800  | 0.52483200  |
| C  | -5.01716700 | -0.58836100 | -0.48642600 |
| C  | -4.77474000 | 2.14268500  | 2.20124000  |
| H  | -5.83554500 | 2.32065200  | 2.04781900  |
| H  | -4.23684400 | 3.08295300  | 2.06585200  |
| H  | -4.62304100 | 1.83342900  | 3.23765900  |
| C  | -6.24467400 | -1.12247700 | -1.17638200 |
| H  | -7.13813600 | -0.60807100 | -0.83348300 |
| H  | -6.36145000 | -2.19103700 | -0.98581900 |
| H  | -6.16524400 | -0.99782400 | -2.25837200 |
| C  | 5.19136100  | 0.29943800  | -0.57334400 |
| C  | 5.40400800  | -0.44823100 | 0.59306100  |
| H  | 6.43603400  | -0.61556700 | 0.85670200  |
| C  | 4.45929000  | -1.00913800 | 1.46437500  |
| C  | 6.40742500  | 0.78780000  | -1.31330700 |
| H  | 6.40906300  | 0.41934700  | -2.34111300 |
| H  | 7.31929300  | 0.45646100  | -0.82458500 |
| H  | 6.41819200  | 1.87865500  | -1.36430700 |
| C  | 4.98696300  | -1.76460600 | 2.65419800  |
| H  | 4.63134700  | -1.32001300 | 3.58587700  |
| H  | 6.07322100  | -1.76573200 | 2.66310800  |
| H  | 4.63688900  | -2.79864500 | 2.64084800  |
| C  | 0.04723000  | 1.68110600  | -0.46453200 |
| O  | 1.54561500  | -1.21266500 | -1.35504300 |
| C  | 0.28170400  | -1.16457600 | -1.71521300 |
| O  | -0.28813800 | -2.10111800 | -2.23296300 |
| C  | -3.72848900 | -2.24672800 | -1.70395000 |
| H  | -4.18616400 | -3.15489500 | -1.30251300 |
| H  | -4.19865900 | -2.01511900 | -2.66186300 |
| H  | -2.67557800 | -2.44883800 | -1.89068200 |
| C  | -2.07062300 | 1.43886300  | 2.22325300  |
| H  | -1.96444700 | 2.50947800  | 2.04125000  |
| H  | -2.41184800 | 1.27875700  | 3.24854600  |
| H  | -1.08362300 | 0.99308500  | 2.12753500  |
| C  | 3.84145100  | 1.38394300  | -2.27031800 |
| H  | 4.23748800  | 0.85829600  | -3.14267100 |



|   |             |             |             |
|---|-------------|-------------|-------------|
| H | 2.78297300  | 1.56815700  | -2.44538300 |
| H | 4.33873000  | 2.35350000  | -2.19356700 |
| C | 2.22962800  | -1.52564000 | 2.26784600  |
| H | 1.20383700  | -1.33643700 | 1.96265100  |
| H | 2.36030000  | -2.60886600 | 2.31361500  |
| H | 2.36879700  | -1.11572500 | 3.27117800  |
| C | 1.71510200  | 2.42966200  | 1.09820300  |
| H | 1.96026600  | 3.33508900  | 0.53566900  |
| H | 0.97990300  | 2.71683400  | 1.85264700  |
| H | 2.61319900  | 2.06678700  | 1.60150700  |
| C | -1.69897100 | 3.20616300  | -1.02857400 |
| H | -1.72776400 | 2.84684900  | -2.06423200 |
| H | -2.60056200 | 2.82864900  | -0.53153800 |
| H | -1.77273000 | 4.29487700  | -1.04518500 |

Cartesian coordinates of the optimized geometry for **14** at B3LYP-D3BJ/def2-TZVP level of theory (number of imaginary frequencies = 0):

|    |             |             |             |
|----|-------------|-------------|-------------|
| Ga | 2.51899400  | -0.20800400 | -0.00612500 |
| Ga | -2.85473700 | 0.52118400  | -0.20092500 |
| Cl | 2.98703100  | 0.30375700  | 2.09413700  |
| P  | 0.38040800  | 0.76373200  | -0.30944800 |
| N  | 2.89367900  | -2.07771200 | -0.54526000 |
| N  | 4.06221500  | 0.57277700  | -0.95716800 |
| N  | -3.44988300 | 2.20207800  | 0.57838100  |
| N  | -4.55387500 | -0.42396000 | -0.15844400 |
| N  | -1.91740500 | 0.70625300  | -1.81373500 |
| N  | -0.04442300 | 0.43515800  | -3.10405800 |
| C  | 3.68132600  | -2.34001000 | -1.58151000 |
| C  | 4.34305700  | -1.36567300 | -2.34740000 |
| H  | 4.83937500  | -1.73263600 | -3.23166900 |
| C  | 4.59215700  | -0.03610100 | -2.01869900 |
| C  | 3.96804500  | -3.76923600 | -1.97258900 |
| H  | 4.18260500  | -3.82851400 | -3.03773600 |
| H  | 3.15901800  | -4.44782400 | -1.72511600 |
| H  | 4.85685900  | -4.10842400 | -1.43729600 |
| C  | 5.51573300  | 0.73846000  | -2.92346100 |
| H  | 5.99598500  | 0.08235800  | -3.64486500 |
| H  | 6.27722900  | 1.27755900  | -2.36543600 |
| H  | 4.93252900  | 1.48610900  | -3.46558900 |
| C  | 2.29015600  | -3.18259700 | 0.15715100  |
| C  | 2.94393600  | -3.75235000 | 1.25524800  |
| C  | 2.36991100  | -4.87944600 | 1.84419000  |
| H  | 2.86094700  | -5.34221100 | 2.69011100  |
| C  | 1.18177400  | -5.40856400 | 1.37225800  |
| H  | 0.75392300  | -6.28541800 | 1.84162900  |
| C  | 0.52178200  | -4.79283400 | 0.31847300  |
| H  | -0.43071700 | -5.18208800 | -0.01366800 |
| C  | 1.05264100  | -3.66605200 | -0.29969100 |
| C  | 4.22567600  | -3.17920800 | 1.83136600  |
| H  | 4.42897700  | -2.23897700 | 1.32306000  |
| C  | 5.42741900  | -4.10346200 | 1.60159000  |
| H  | 6.33634200  | -3.65165400 | 2.00451600  |
| H  | 5.59111300  | -4.29966100 | 0.54182700  |
| H  | 5.28308300  | -5.06510600 | 2.09853600  |
| C  | 4.06726400  | -2.86091100 | 3.32250300  |
| H  | 3.93806200  | -3.77171600 | 3.91075400  |
| H  | 3.20806300  | -2.21419800 | 3.48883900  |
| H  | 4.95557100  | -2.34675400 | 3.69280300  |
| C  | 0.28825800  | -2.96182200 | -1.40558900 |
| H  | 0.58324900  | -1.91566200 | -1.37646700 |
| C  | 0.61720200  | -3.47516800 | -2.81331300 |
| H  | 1.65538800  | -3.30062500 | -3.08713200 |
| H  | -0.00534300 | -2.95705400 | -3.54533900 |
| H  | 0.41873600  | -4.54678300 | -2.89186500 |
| C  | -1.22320700 | -3.00716100 | -1.18679000 |
| H  | -1.64454200 | -3.97815600 | -1.44921900 |

|   |             |             |             |
|---|-------------|-------------|-------------|
| H | -1.69857800 | -2.26446500 | -1.82402500 |
| H | -1.49192600 | -2.79096300 | -0.15623900 |
| C | 4.74425200  | 1.71652600  | -0.41583100 |
| C | 5.89107300  | 1.49032200  | 0.37022400  |
| C | 6.59111400  | 2.59481000  | 0.84529000  |
| H | 7.48007300  | 2.44291800  | 1.44298700  |
| C | 6.16317400  | 3.88681000  | 0.57814400  |
| H | 6.72292500  | 4.73321600  | 0.95540400  |
| C | 5.00592100  | 4.08804100  | -0.15361300 |
| H | 4.65976400  | 5.09654000  | -0.33929900 |
| C | 4.27443400  | 3.01236300  | -0.65585000 |
| C | 6.37502100  | 0.09013700  | 0.71179000  |
| H | 5.57996400  | -0.60473800 | 0.45032400  |
| C | 7.61720300  | -0.30354500 | -0.09868800 |
| H | 7.93835100  | -1.31249100 | 0.16890500  |
| H | 8.44589800  | 0.37858700  | 0.10414500  |
| H | 7.42519100  | -0.28858200 | -1.17088700 |
| C | 6.64084500  | -0.07611800 | 2.21124800  |
| H | 6.88257300  | -1.11785700 | 2.43093900  |
| H | 5.76299700  | 0.20201400  | 2.79143900  |
| H | 7.48515700  | 0.53156700  | 2.54197500  |
| C | 2.99207600  | 3.27328600  | -1.41613900 |
| H | 2.55755900  | 2.30764600  | -1.66814800 |
| C | 3.23230700  | 4.02220400  | -2.73144200 |
| H | 3.93165700  | 3.48832600  | -3.37631000 |
| H | 3.64478100  | 5.01654800  | -2.54840700 |
| H | 2.29321700  | 4.14359200  | -3.27546400 |
| C | 1.98305400  | 4.01797000  | -0.53997900 |
| H | 2.33197100  | 5.02627800  | -0.30564400 |
| H | 1.80798500  | 3.49225100  | 0.39683200  |
| H | 1.02689400  | 4.10166500  | -1.05149400 |
| C | -4.73913600 | 2.48216500  | 0.71459300  |
| C | -5.77094000 | 1.58224800  | 0.41142900  |
| H | -6.76973700 | 1.96562500  | 0.55268900  |
| C | -5.69331300 | 0.22739600  | 0.08538700  |
| C | -5.16445800 | 3.83611300  | 1.21874400  |
| H | -4.40530700 | 4.29620300  | 1.84427700  |
| H | -6.09645800 | 3.75713600  | 1.77414100  |
| H | -5.33804500 | 4.49846100  | 0.36867800  |
| C | -7.00459300 | -0.51122900 | 0.00847200  |
| H | -6.89403000 | -1.57026100 | 0.22065100  |
| H | -7.40568700 | -0.41547900 | -1.00264100 |
| H | -7.72778400 | -0.07821000 | 0.69557300  |
| C | -2.43853600 | 3.13925100  | 0.99539600  |
| C | -1.84383800 | 2.96417000  | 2.25713700  |
| C | -0.86968500 | 3.87705100  | 2.65293700  |
| H | -0.39258200 | 3.75917300  | 3.61547700  |
| C | -0.49657200 | 4.92879700  | 1.83234000  |
| H | 0.26441100  | 5.62612800  | 2.15762500  |
| C | -1.07919900 | 5.07007200  | 0.58518900  |
| H | -0.76406800 | 5.87907500  | -0.06015300 |
| C | -2.04611000 | 4.17493000  | 0.13372100  |
| C | -2.26241600 | 1.84536400  | 3.19498700  |
| H | -2.70508100 | 1.05537400  | 2.59462300  |
| C | -3.33852100 | 2.32543100  | 4.17846300  |
| H | -3.63858600 | 1.50917800  | 4.83905300  |
| H | -4.22957100 | 2.68132000  | 3.66016200  |
| H | -2.96164600 | 3.14204400  | 4.79825400  |
| C | -1.08084600 | 1.22025100  | 3.94109100  |
| H | -1.40928600 | 0.31985700  | 4.46134700  |
| H | -0.66916400 | 1.89938600  | 4.69018600  |
| H | -0.27778100 | 0.93549600  | 3.26319600  |
| C | -2.61166200 | 4.34321300  | -1.26546300 |
| H | -3.34948500 | 3.55818000  | -1.42986800 |
| C | -3.31230700 | 5.69654400  | -1.44533500 |
| H | -2.59822100 | 6.51867000  | -1.37080100 |
| H | -4.08099000 | 5.86230300  | -0.69075100 |
| H | -3.78105000 | 5.75367200  | -2.42980800 |

|   |             |             |             |
|---|-------------|-------------|-------------|
| C | -1.51594800 | 4.17549600  | -2.32539300 |
| H | -0.99904000 | 3.22481500  | -2.21381300 |
| H | -0.77783700 | 4.97588300  | -2.25041600 |
| H | -1.94724300 | 4.21784100  | -3.32723300 |
| C | -4.52736600 | -1.86787400 | -0.17195500 |
| C | -4.29115700 | -2.53276600 | 1.04741400  |
| C | -4.23828800 | -3.92387000 | 1.03636600  |
| H | -4.05389300 | -4.45299400 | 1.96088700  |
| C | -4.41826300 | -4.64153000 | -0.13496700 |
| H | -4.37246400 | -5.72300700 | -0.12156700 |
| C | -4.65410300 | -3.97101600 | -1.32171300 |
| H | -4.79436100 | -4.53638400 | -2.23341400 |
| C | -4.70978400 | -2.57876400 | -1.36800400 |
| C | -4.15970100 | -1.79297200 | 2.36851100  |
| H | -3.95149200 | -0.74870700 | 2.15127200  |
| C | -5.48330400 | -1.83943000 | 3.14625100  |
| H | -5.75397000 | -2.86880700 | 3.39103800  |
| H | -6.30465700 | -1.40534700 | 2.57577000  |
| H | -5.39150100 | -1.28250300 | 4.08096900  |
| C | -3.00506400 | -2.30831100 | 3.23112100  |
| H | -2.06206600 | -2.27624100 | 2.68944100  |
| H | -3.18193300 | -3.32836000 | 3.57744400  |
| H | -2.90431500 | -1.68006100 | 4.11821900  |
| C | -4.99924500 | -1.90221500 | -2.69573900 |
| H | -4.93915000 | -0.82537900 | -2.54239900 |
| C | -6.41482300 | -2.23133500 | -3.19302900 |
| H | -6.64049800 | -1.66600900 | -4.09957000 |
| H | -7.17376600 | -1.99942300 | -2.44724900 |
| H | -6.50341200 | -3.29282400 | -3.43193000 |
| C | -3.97665000 | -2.28394800 | -3.77249600 |
| H | -2.95905200 | -2.06390400 | -3.45918900 |
| H | -4.17587400 | -1.73420600 | -4.69413900 |
| H | -4.03059500 | -3.34908400 | -4.00395300 |
| C | -0.55132800 | 0.53352800  | -1.93667800 |
| O | -1.75355600 | -0.42393400 | 0.94652100  |
| C | -0.44280800 | -0.47553400 | 0.82794200  |
| O | 0.22756600  | -1.24012400 | 1.48903600  |
| C | -2.65137800 | 0.92275600  | -3.05535600 |
| H | -2.25205900 | 1.78210000  | -3.59612600 |
| H | -2.58502800 | 0.06884400  | -3.72874300 |
| H | -3.70134800 | 1.10993500  | -2.82255500 |
| C | 1.36207400  | 0.26531000  | -3.33592100 |
| H | 1.88422500  | 1.22585000  | -3.39530200 |
| H | 1.86017800  | -0.33878500 | -2.57340700 |
| H | 1.51054800  | -0.23909000 | -4.29218200 |

Cartesian coordinates of the optimized geometry for **RS5** at B3LYP-D3BJ/def2-TZVP level of theory (number of imaginary frequencies = 0):

|    |             |             |             |
|----|-------------|-------------|-------------|
| Ga | -1.60001300 | -0.97281800 | -0.21811400 |
| Ga | 1.95136500  | 0.04929800  | -0.25017500 |
| Cl | -0.83569700 | -2.98200600 | 0.45399400  |
| P  | -0.06390200 | 0.28032900  | -1.41180300 |
| N  | -2.51812800 | -0.16533200 | 1.29930100  |
| N  | -3.19695700 | -1.38369100 | -1.26834600 |
| N  | 3.59051300  | 0.08047100  | -1.30385400 |
| N  | 2.59846700  | -1.14020900 | 1.13701100  |
| N  | 1.29902000  | 1.76922800  | 0.32175500  |
| N  | -0.75588300 | 2.79803800  | -0.15872500 |
| C  | -3.83213900 | -0.24587300 | 1.45538800  |
| C  | -4.70810900 | -0.79008200 | 0.50774300  |
| H  | -5.75056000 | -0.79025300 | 0.78336700  |
| C  | -4.41819700 | -1.29686200 | -0.76726800 |
| C  | -4.44712200 | 0.29425400  | 2.72017500  |
| H  | -5.51386200 | 0.08980300  | 2.74828000  |
| H  | -4.30361100 | 1.37493800  | 2.78773300  |
| H  | -3.98142400 | -0.14885500 | 3.60220200  |

|   |             |             |             |
|---|-------------|-------------|-------------|
| C | -5.58499500 | -1.75464500 | -1.60334300 |
| H | -6.51489000 | -1.67670000 | -1.04672000 |
| H | -5.45310300 | -2.79056400 | -1.92152900 |
| H | -5.67416000 | -1.14922800 | -2.50805300 |
| C | 4.57780400  | -0.78158000 | -1.11464300 |
| C | 4.60353200  | -1.71774100 | -0.07160900 |
| H | 5.45290000  | -2.38194700 | -0.05830800 |
| C | 3.70010600  | -1.86474900 | 0.98993900  |
| C | 5.75138700  | -0.76526400 | -2.05776100 |
| H | 5.42515200  | -0.92071000 | -3.08810800 |
| H | 6.46858400  | -1.53951300 | -1.79949200 |
| H | 6.25924100  | 0.20111700  | -2.02574700 |
| C | 4.02991000  | -2.90163200 | 2.03103400  |
| H | 3.18794200  | -3.57952900 | 2.18087000  |
| H | 4.24229800  | -2.43250600 | 2.99433400  |
| H | 4.90004000  | -3.48157100 | 1.73574400  |
| C | 0.06829600  | 1.83693300  | -0.29623300 |
| C | 1.79181700  | 2.88636900  | 1.11980000  |
| H | 1.52343800  | 3.81153400  | 0.59853400  |
| C | 3.30978400  | 2.79233200  | 1.22473100  |
| H | 3.60682400  | 1.86019600  | 1.71407800  |
| H | 3.71080100  | 3.62054800  | 1.81141300  |
| H | 3.77271200  | 2.81608900  | 0.23684000  |
| C | 1.13922800  | 2.92954400  | 2.50248000  |
| H | 0.05861500  | 3.00939000  | 2.39960800  |
| H | 1.49599500  | 3.78890400  | 3.07560100  |
| H | 1.37843800  | 2.02314700  | 3.06575300  |
| C | -1.99229500 | 2.81800200  | -0.91552200 |
| H | -2.21788300 | 1.81562300  | -1.31181800 |
| C | -1.85599200 | 3.76612600  | -2.10737600 |
| H | -2.78828000 | 3.82179100  | -2.67493000 |
| H | -1.06478500 | 3.42187100  | -2.77496900 |
| H | -1.59852400 | 4.76912100  | -1.76035000 |
| C | -3.14266400 | 3.23666400  | -0.00386500 |
| H | -4.08721500 | 3.26367000  | -0.55161500 |
| H | -2.95056800 | 4.22777200  | 0.41232100  |
| H | -3.24785400 | 2.53503000  | 0.82285300  |
| C | 3.64216100  | 1.04667000  | -2.39396900 |
| H | 3.66532400  | 0.55904500  | -3.37201000 |
| H | 2.75040200  | 1.66880600  | -2.35305100 |
| H | 4.51355900  | 1.70174700  | -2.31489200 |
| C | 1.76086500  | -1.30294300 | 2.32113200  |
| H | 1.17810400  | -2.22464500 | 2.27914200  |
| H | 2.35172500  | -1.28638100 | 3.23842200  |
| H | 1.06180500  | -0.47239600 | 2.36496400  |
| C | -1.68775600 | 0.44260000  | 2.33056300  |
| H | -2.08271300 | 1.40157600  | 2.66558300  |
| H | -1.57833500 | -0.21548500 | 3.19824900  |
| H | -0.70300600 | 0.63695300  | 1.91773800  |
| C | -2.97719700 | -1.91913500 | -2.60544000 |
| H | -3.15493800 | -2.99777300 | -2.64136900 |
| H | -3.61260200 | -1.43683000 | -3.35081200 |
| H | -1.94187300 | -1.73900200 | -2.88949600 |

Cartesian coordinates of the optimized geometry for **2** at B3LYP-D3BJ/def2-TZVP level of theory (number of imaginary frequencies = 0):

|    |             |             |             |
|----|-------------|-------------|-------------|
| Ga | -1.89288500 | -0.22742500 | 0.15200800  |
| Ga | 2.25067300  | 0.26232000  | -0.04565500 |
| Cl | -1.96539100 | -0.41672300 | -2.05495600 |
| P  | 0.10857900  | 0.78580400  | 0.66493700  |
| N  | -2.72653800 | -1.83976600 | 0.90643200  |
| N  | -3.38338300 | 1.01356600  | 0.65072900  |
| N  | 2.99540300  | 1.86401100  | -0.96079000 |
| N  | 3.29860000  | -1.09313800 | -1.04409300 |
| N  | 2.34207200  | 0.20604300  | 1.90142700  |
| N  | 0.59682800  | 0.30369800  | 3.46768600  |

|   |             |             |             |
|---|-------------|-------------|-------------|
| C | -3.60332700 | -1.73746800 | 1.90518900  |
| C | -4.20395200 | -0.54154000 | 2.29739200  |
| H | -4.87178500 | -0.61435100 | 3.14227000  |
| C | -4.19073200 | 0.70602500  | 1.65332600  |
| C | -3.97876800 | -2.96708600 | 2.69078200  |
| H | -4.97283500 | -2.86317500 | 3.11920200  |
| H | -3.26897900 | -3.08881800 | 3.51169600  |
| H | -3.93704000 | -3.86896200 | 2.08652000  |
| C | -5.17864800 | 1.71463500  | 2.18189400  |
| H | -6.13866000 | 1.23893400  | 2.37495900  |
| H | -5.32044100 | 2.54946400  | 1.50346900  |
| H | -4.80825700 | 2.10353400  | 3.13227200  |
| C | -2.34299300 | -3.12361400 | 0.38330600  |
| C | -3.06462100 | -3.65129400 | -0.70474100 |
| C | -2.65798400 | -4.87393400 | -1.23270000 |
| H | -3.19746500 | -5.29729000 | -2.06820100 |
| C | -1.56611600 | -5.55452100 | -0.71562000 |
| H | -1.25820300 | -6.49677200 | -1.15096100 |
| C | -0.87007600 | -5.02260000 | 0.35425000  |
| H | -0.01291200 | -5.54985500 | 0.75047900  |
| C | -1.24769700 | -3.80916100 | 0.92711500  |
| C | -4.28365500 | -2.94615100 | -1.27052800 |
| H | -4.18479000 | -1.89058200 | -1.03104600 |
| C | -5.57379700 | -3.44969500 | -0.60847100 |
| H | -6.43929200 | -2.92390400 | -1.01763200 |
| H | -5.56491400 | -3.28847800 | 0.46865900  |
| H | -5.71011900 | -4.51866800 | -0.78777900 |
| C | -4.38466200 | -3.05698700 | -2.79243300 |
| H | -4.57699800 | -4.08179500 | -3.11521300 |
| H | -3.47122600 | -2.70621300 | -3.27035200 |
| H | -5.21243000 | -2.44578900 | -3.15311900 |
| C | -0.46998500 | -3.27607100 | 2.11012500  |
| H | -0.91572800 | -2.32936600 | 2.40436800  |
| C | -0.52637800 | -4.22587700 | 3.31273400  |
| H | -1.55095600 | -4.47116300 | 3.59339000  |
| H | -0.03471000 | -3.76906600 | 4.17350000  |
| H | -0.01145200 | -5.16335900 | 3.09365500  |
| C | 0.97791300  | -2.99584500 | 1.72625400  |
| H | 1.48659300  | -3.91144400 | 1.42873200  |
| H | 1.51463600  | -2.54773900 | 2.55881600  |
| H | 1.02181800  | -2.30551100 | 0.88835300  |
| C | -3.53945900 | 2.22643400  | -0.11171500 |
| C | -4.30273900 | 2.17110700  | -1.29643400 |
| C | -4.37653700 | 3.31091000  | -2.09143500 |
| H | -4.95075300 | 3.28380100  | -3.00641600 |
| C | -3.72219400 | 4.47931100  | -1.73583100 |
| H | -3.78097300 | 5.35152200  | -2.37459600 |
| C | -3.00398100 | 4.52750600  | -0.55605600 |
| H | -2.50829800 | 5.44546300  | -0.27203100 |
| C | -2.90321300 | 3.41689000  | 0.28254100  |
| C | -5.09167800 | 0.93296700  | -1.68457900 |
| H | -4.59444000 | 0.07608000  | -1.23852700 |
| C | -6.51618000 | 0.98849400  | -1.11408200 |
| H | -7.06745300 | 0.08519000  | -1.38472700 |
| H | -7.05854300 | 1.84918200  | -1.51199100 |
| H | -6.51579000 | 1.06676800  | -0.02846700 |
| C | -5.13909300 | 0.69550000  | -3.19458900 |
| H | -5.60744500 | -0.26701900 | -3.40159900 |
| H | -4.13744300 | 0.68346500  | -3.62074800 |
| H | -5.72961600 | 1.45680600  | -3.70765800 |
| C | -2.17431400 | 3.57826600  | 1.60379500  |
| H | -2.06523100 | 2.59235300  | 2.05054700  |
| C | -2.97962900 | 4.46359700  | 2.56851700  |
| H | -3.99503500 | 4.10227300  | 2.71772300  |
| H | -3.04693900 | 5.48312900  | 2.18326200  |
| H | -2.48523600 | 4.50538300  | 3.54069600  |
| C | -0.77766500 | 4.17310100  | 1.42607000  |
| H | -0.82721900 | 5.19719200  | 1.05656300  |

|   |             |             |             |
|---|-------------|-------------|-------------|
| H | -0.18422600 | 3.58435900  | 0.73400400  |
| H | -0.25446700 | 4.19872100  | 2.38226800  |
| C | 4.13866400  | 1.79672600  | -1.63359900 |
| C | 4.79320100  | 0.59835500  | -1.93761900 |
| H | 5.70228300  | 0.70590700  | -2.50670200 |
| C | 4.34963800  | -0.71782700 | -1.78118200 |
| C | 4.77818800  | 3.06013800  | -2.14966100 |
| H | 4.05977100  | 3.67637100  | -2.68700200 |
| H | 5.61263600  | 2.82762100  | -2.80581800 |
| H | 5.14633700  | 3.65888300  | -1.31633900 |
| C | 5.10384400  | -1.74003200 | -2.60143200 |
| H | 5.17093500  | -2.71103100 | -2.12607900 |
| H | 6.10467200  | -1.37558200 | -2.82042500 |
| H | 4.58169600  | -1.88183900 | -3.54876000 |
| C | 2.29148400  | 3.12655900  | -0.94495400 |
| C | 1.28764400  | 3.34895000  | -1.90690400 |
| C | 0.69368700  | 4.60807300  | -1.96047100 |
| H | -0.08176300 | 4.79719900  | -2.68729400 |
| C | 1.07106200  | 5.62208000  | -1.09637600 |
| H | 0.60084700  | 6.59498400  | -1.16269300 |
| C | 2.02398900  | 5.37336400  | -0.12710200 |
| H | 2.28965400  | 6.15350300  | 0.57348400  |
| C | 2.63929600  | 4.12750900  | -0.02458100 |
| C | 0.86974300  | 2.28173500  | -2.90418500 |
| H | 0.95490100  | 1.31234200  | -2.40952100 |
| C | 1.79695400  | 2.27201100  | -4.12897300 |
| H | 1.43932500  | 1.55380300  | -4.86777300 |
| H | 2.81907500  | 1.99917800  | -3.87264200 |
| H | 1.81377900  | 3.25838100  | -4.59810300 |
| C | -0.58345000 | 2.43044100  | -3.35904200 |
| H | -0.88134500 | 1.54905700  | -3.92467600 |
| H | -0.71322700 | 3.29865300  | -4.00849400 |
| H | -1.26518200 | 2.52572900  | -2.51588200 |
| C | 3.62622500  | 3.88797800  | 1.09743200  |
| H | 4.13964100  | 2.95423700  | 0.88416900  |
| C | 4.69148300  | 4.98282400  | 1.21693100  |
| H | 4.25880600  | 5.93083400  | 1.54053600  |
| H | 5.20278100  | 5.16019200  | 0.26949900  |
| H | 5.43966500  | 4.69598400  | 1.95834700  |
| C | 2.87738900  | 3.71872800  | 2.42521600  |
| H | 2.14541200  | 2.91605700  | 2.36486700  |
| H | 2.34956900  | 4.63872000  | 2.68385500  |
| H | 3.57425100  | 3.48982400  | 3.23336200  |
| C | 2.96630600  | -2.50174100 | -1.06528700 |
| C | 2.00524900  | -2.97562800 | -1.97707000 |
| C | 1.82491500  | -4.35592900 | -2.07174800 |
| H | 1.08726800  | -4.75023800 | -2.75169900 |
| C | 2.56559300  | -5.23779300 | -1.30649100 |
| H | 2.41665600  | -6.30487600 | -1.41263300 |
| C | 3.46611600  | -4.75006700 | -0.37701200 |
| H | 4.00427100  | -5.44467100 | 0.25076800  |
| C | 3.66696500  | -3.38136400 | -0.21682900 |
| C | 1.15085800  | -2.04719500 | -2.83269300 |
| H | 0.78305900  | -1.25065600 | -2.17975300 |
| C | 1.92064600  | -1.38496400 | -3.98399800 |
| H | 2.39715900  | -2.14030900 | -4.61338900 |
| H | 2.67944400  | -0.68762500 | -3.64094600 |
| H | 1.22432900  | -0.82396100 | -4.60820600 |
| C | -0.07875600 | -2.74865300 | -3.41312100 |
| H | -0.67578600 | -3.23461300 | -2.64322100 |
| H | 0.20604900  | -3.49442800 | -4.15919400 |
| H | -0.71154700 | -2.01462500 | -3.90625600 |
| C | 4.58155600  | -2.88423400 | 0.89360000  |
| H | 4.13041600  | -1.96294300 | 1.25730000  |
| C | 6.01566500  | -2.55857100 | 0.44934400  |
| H | 6.62729400  | -2.33405900 | 1.32501200  |
| H | 6.06739600  | -1.69602500 | -0.20947900 |
| H | 6.46708800  | -3.41120100 | -0.06280400 |

|   |             |             |            |
|---|-------------|-------------|------------|
| C | 4.65264500  | -3.85632600 | 2.07634700 |
| H | 3.66323200  | -4.15788500 | 2.41772400 |
| H | 5.16809000  | -3.37903500 | 2.90994900 |
| H | 5.21752100  | -4.75569900 | 1.82393200 |
| C | 1.01205300  | 0.33852900  | 2.26278700 |
| C | 3.35907400  | 0.28517100  | 2.95650200 |
| H | 3.09805600  | 1.14094600  | 3.58748700 |
| C | 4.73518200  | 0.53657500  | 2.35167600 |
| H | 5.04707700  | -0.28079200 | 1.70295200 |
| H | 5.48158200  | 0.63362500  | 3.14178600 |
| H | 4.75220200  | 1.44999300  | 1.76209500 |
| C | 3.37807500  | -0.93805900 | 3.87575700 |
| H | 2.40725400  | -1.05875100 | 4.34896800 |
| H | 4.13337300  | -0.80550600 | 4.65503400 |
| H | 3.61760200  | -1.84385900 | 3.32510500 |
| C | -0.78245400 | 0.57359000  | 3.79933900 |
| H | -1.39946300 | 0.62976900  | 2.88791600 |
| C | -0.88075700 | 1.91742100  | 4.52233900 |
| H | -1.91835100 | 2.15914700  | 4.76483000 |
| H | -0.47150500 | 2.71530000  | 3.90606800 |
| H | -0.30636600 | 1.87920700  | 5.44988100 |
| C | -1.34103000 | -0.53952100 | 4.68415800 |
| H | -2.38267200 | -0.34152500 | 4.94441400 |
| H | -0.75628000 | -0.61095500 | 5.60336100 |
| H | -1.29172700 | -1.50300900 | 4.18121000 |

Cartesian coordinates of the optimized geometry for **RS9** at B3LYP-D3BJ/def2-TZVP level of theory (number of imaginary frequencies = 0):

|    |             |             |             |
|----|-------------|-------------|-------------|
| Ga | -2.66138800 | -1.07744700 | 0.20803100  |
| Ga | 2.68406900  | -0.17580700 | 0.19463200  |
| Cl | -2.94576000 | -3.25083100 | 0.50093200  |
| P  | -0.40140400 | -0.71426000 | -0.32972300 |
| N  | -3.60416500 | -0.05657000 | 1.56339700  |
| N  | -3.81731500 | -0.64781500 | -1.30900200 |
| N  | 3.63998400  | -1.31814600 | -1.03125500 |
| N  | 4.17491300  | 0.42687600  | 1.25797400  |
| N  | 1.58776800  | 1.12779300  | -0.61828000 |
| N  | -0.48060600 | 2.12866400  | -0.73739100 |
| C  | -4.67239700 | 0.67247300  | 1.27378500  |
| C  | -5.25043000 | 0.77193600  | -0.00039800 |
| H  | -6.12051800 | 1.40540500  | -0.06572900 |
| C  | -4.87145100 | 0.14210000  | -1.19425700 |
| C  | -5.32479900 | 1.46230100  | 2.37746100  |
| H  | -6.17626600 | 2.02279300  | 2.00177500  |
| H  | -4.61441300 | 2.16270800  | 2.82100300  |
| H  | -5.66733500 | 0.80343800  | 3.17763700  |
| C  | -5.72388900 | 0.39876800  | -2.40837000 |
| H  | -6.54021300 | 1.07645700  | -2.17416600 |
| H  | -6.14560600 | -0.53420300 | -2.78814400 |
| H  | -5.12956400 | 0.83430500  | -3.21396400 |
| C  | 4.96509700  | -1.34564400 | -1.06212700 |
| C  | 5.79081200  | -0.63988400 | -0.17325700 |
| H  | 6.85070400  | -0.75958900 | -0.33074100 |
| C  | 5.42911700  | 0.14403800  | 0.93007200  |
| C  | 5.64638500  | -2.18430200 | -2.10973500 |
| H  | 5.35352500  | -3.23201300 | -2.01819700 |
| H  | 6.72681000  | -2.11744500 | -2.01913900 |
| H  | 5.36001500  | -1.85911800 | -3.11206500 |
| C  | 6.54122500  | 0.68326400  | 1.78839900  |
| H  | 6.49500100  | 1.77274300  | 1.84516000  |
| H  | 7.51141600  | 0.39637400  | 1.39278700  |
| H  | 6.45862300  | 0.30575000  | 2.80970000  |
| C  | 0.20796000  | 1.07783900  | -0.52808400 |
| C  | 2.17634000  | 2.37157300  | -1.14470700 |
| H  | 1.45361300  | 2.76339900  | -1.86205800 |
| C  | 3.48034100  | 2.07731900  | -1.88146100 |

|   |             |             |             |
|---|-------------|-------------|-------------|
| H | 4.26159000  | 1.70802400  | -1.21220900 |
| H | 3.86043500  | 2.99027400  | -2.34343000 |
| H | 3.32509500  | 1.33583500  | -2.66642200 |
| C | 2.36732600  | 3.43316000  | -0.06211000 |
| H | 1.42667600  | 3.60621500  | 0.45746300  |
| H | 2.69805000  | 4.37759200  | -0.50148700 |
| H | 3.12168600  | 3.11964800  | 0.66225800  |
| C | -1.91674000 | 2.20297000  | -0.71075200 |
| H | -2.36033500 | 1.24777800  | -0.42779000 |
| C | -2.44419900 | 2.56301300  | -2.09856000 |
| H | -3.53098400 | 2.66302700  | -2.08378400 |
| H | -2.17376400 | 1.79162700  | -2.82171900 |
| H | -2.00984300 | 3.50688500  | -2.43337600 |
| C | -2.34555900 | 3.23218400  | 0.33378300  |
| H | -3.43245000 | 3.32916000  | 0.35470700  |
| H | -1.90683100 | 4.20588800  | 0.10734500  |
| H | -2.00386400 | 2.92886700  | 1.32489600  |
| O | 1.64508300  | -1.07453400 | 1.45084500  |
| C | 0.33925900  | -1.20769300 | 1.33184800  |
| O | -0.34681600 | -1.69245900 | 2.20452000  |
| C | -3.49567700 | -1.27908200 | -2.58214800 |
| H | -4.29854800 | -1.93625900 | -2.92487800 |
| H | -3.29592900 | -0.53912700 | -3.36180700 |
| H | -2.60312900 | -1.88856800 | -2.45929600 |
| C | -3.09190100 | -0.10987600 | 2.93187900  |
| H | -2.76431000 | 0.87626100  | 3.27257200  |
| H | -3.84852600 | -0.48079500 | 3.62696000  |
| H | -2.23824500 | -0.78048400 | 2.96428500  |
| C | 2.85586800  | -2.10039800 | -1.98505900 |
| H | 3.03272000  | -3.17191600 | -1.86628000 |
| H | 1.79764300  | -1.91255300 | -1.81240600 |
| H | 3.08442200  | -1.82373600 | -3.01713900 |
| C | 3.87277900  | 1.15375200  | 2.48780500  |
| H | 2.79616900  | 1.28316800  | 2.56642600  |
| H | 4.20319500  | 0.59987600  | 3.36939400  |
| H | 4.33616900  | 2.14268400  | 2.50426000  |

Cartesian coordinates of the optimized geometry for **15** at B3LYP-D3BJ/def2-TZVP level of theory (number of imaginary frequencies = 0):

|    |             |             |             |
|----|-------------|-------------|-------------|
| Ga | -2.47667800 | -0.29132400 | -0.12354900 |
| Ga | 2.80654300  | 0.51727400  | 0.16679600  |
| Cl | -2.87244500 | 0.03773200  | -2.27996500 |
| P  | -0.38951300 | 0.78937100  | 0.23759800  |
| N  | -2.77115500 | -2.11101800 | 0.61924200  |
| N  | -4.11904200 | 0.51423400  | 0.63953400  |
| N  | 3.23507100  | 2.20759000  | -0.72641300 |
| N  | 4.50625100  | -0.41313700 | -0.14002900 |
| N  | 1.90365200  | 0.69138100  | 1.82446800  |
| N  | -0.03620000 | 0.82353400  | 3.04318000  |
| C  | -3.59201100 | -2.27358300 | 1.65032300  |
| C  | -4.33087100 | -1.24442700 | 2.26018900  |
| H  | -4.83435700 | -1.52362500 | 3.17212800  |
| C  | -4.64857000 | 0.01246500  | 1.75616400  |
| C  | -3.84692400 | -3.65101700 | 2.21372200  |
| H  | -4.01624700 | -3.58699900 | 3.28723100  |
| H  | -3.04588900 | -4.35234100 | 2.01132600  |
| H  | -4.75807000 | -4.04885000 | 1.76241800  |
| C  | -5.64905100 | 0.83672300  | 2.52391000  |
| H  | -6.10502100 | 0.25693100  | 3.32236600  |
| H  | -6.42850400 | 1.23379000  | 1.87763400  |
| H  | -5.13572800 | 1.69517000  | 2.96326300  |
| C  | -2.12146800 | -3.27531200 | 0.06314000  |
| C  | -2.72111600 | -3.95609500 | -1.00381800 |
| C  | -2.12366700 | -5.13229600 | -1.45586900 |
| H  | -2.57943900 | -5.67605200 | -2.27254100 |
| C  | -0.95927300 | -5.61132200 | -0.88393400 |



|   |             |             |             |
|---|-------------|-------------|-------------|
| H | -0.51152200 | -6.52833500 | -1.24546700 |
| C | -0.35168800 | -4.89428600 | 0.13457400  |
| H | 0.58122300  | -5.24957900 | 0.54972700  |
| C | -0.90668800 | -3.71363300 | 0.61818900  |
| C | -3.98176600 | -3.46187500 | -1.68696300 |
| H | -4.19857200 | -2.46607900 | -1.30917200 |
| C | -5.18680100 | -4.35520100 | -1.36847800 |
| H | -6.08586400 | -3.97487700 | -1.85704500 |
| H | -5.38054600 | -4.40103100 | -0.29648500 |
| H | -5.02076800 | -5.37570300 | -1.71986800 |
| C | -3.77914900 | -3.33272000 | -3.20058900 |
| H | -3.62185300 | -4.30721400 | -3.66691700 |
| H | -2.92086300 | -2.69983000 | -3.41927100 |
| H | -4.65875900 | -2.88145000 | -3.66060300 |
| C | -0.17785500 | -2.93887000 | 1.70154000  |
| H | -0.53702100 | -1.91131400 | 1.67246700  |
| C | -0.45090300 | -3.48489300 | 3.10956900  |
| H | -1.49995000 | -3.41269900 | 3.38849300  |
| H | 0.12817000  | -2.92370100 | 3.84538800  |
| H | -0.15758500 | -4.53529400 | 3.17491400  |
| C | 1.33487800  | -2.91006100 | 1.46077900  |
| H | 1.79391000  | -3.86940600 | 1.70367600  |
| H | 1.78988400  | -2.15487100 | 2.09962900  |
| H | 1.57948100  | -2.67937400 | 0.42751100  |
| C | -4.85212700 | 1.52071900  | -0.08343600 |
| C | -5.90734500 | 1.09834600  | -0.91668800 |
| C | -6.62735900 | 2.06290800  | -1.61406500 |
| H | -7.44416900 | 1.75634300  | -2.25320600 |
| C | -6.30690700 | 3.40829200  | -1.52040600 |
| H | -6.87317800 | 4.14281400  | -2.07884700 |
| C | -5.25505800 | 3.80412100  | -0.71482400 |
| H | -5.00136800 | 4.85388000  | -0.64668800 |
| C | -4.51759200 | 2.87597200  | 0.01984900  |
| C | -6.28085300 | -0.36584200 | -1.07153600 |
| H | -5.45040200 | -0.95701800 | -0.69290300 |
| C | -7.52006700 | -0.73044500 | -0.24267300 |
| H | -7.76393900 | -1.78710200 | -0.37235100 |
| H | -8.38477800 | -0.14273500 | -0.55910800 |
| H | -7.36444900 | -0.55285200 | 0.82069100  |
| C | -6.48606800 | -0.75761700 | -2.53735200 |
| H | -6.64903400 | -1.83339800 | -2.61482900 |
| H | -5.61229100 | -0.49738500 | -3.13218300 |
| H | -7.35998700 | -0.26667400 | -2.96885900 |
| C | -3.39185300 | 3.36750600  | 0.90313000  |
| H | -2.99436400 | 2.50754000  | 1.43798400  |
| C | -3.89169700 | 4.37857500  | 1.94223500  |
| H | -4.68426900 | 3.95763700  | 2.56289000  |
| H | -4.29071400 | 5.27241000  | 1.45985200  |
| H | -3.07710100 | 4.69050800  | 2.59667600  |
| C | -2.25517500 | 3.96441600  | 0.07112800  |
| H | -2.58157900 | 4.87055900  | -0.44406600 |
| H | -1.89517000 | 3.26217800  | -0.67775600 |
| H | -1.41000300 | 4.22604900  | 0.70771900  |
| C | 4.50830700  | 2.53014600  | -0.94244800 |
| C | 5.58912400  | 1.67159700  | -0.70845200 |
| H | 6.56164500  | 2.09442900  | -0.90870200 |
| C | 5.58488600  | 0.29111000  | -0.48232200 |
| C | 4.84377700  | 3.89123100  | -1.49335800 |
| H | 4.15924300  | 4.17666800  | -2.28908400 |
| H | 5.86311800  | 3.91097500  | -1.86939300 |
| H | 4.75145300  | 4.64320400  | -0.70938900 |
| C | 6.91101600  | -0.39422700 | -0.71119600 |
| H | 6.90066400  | -1.44236900 | -0.43617700 |
| H | 7.68318300  | 0.12009100  | -0.13799100 |
| H | 7.18661300  | -0.31501200 | -1.76227300 |
| C | 2.19149300  | 3.10809900  | -1.16452000 |
| C | 1.55028700  | 2.84896800  | -2.38984000 |
| C | 0.58393100  | 3.74952600  | -2.83086400 |

|   |             |             |             |
|---|-------------|-------------|-------------|
| H | 0.07637900  | 3.56484900  | -3.76616700 |
| C | 0.25245000  | 4.87078200  | -2.09029900 |
| H | -0.50445100 | 5.55520100  | -2.45047900 |
| C | 0.87232000  | 5.09516800  | -0.87529200 |
| H | 0.59062200  | 5.95715100  | -0.28570600 |
| C | 1.84117100  | 4.22279200  | -0.38508400 |
| C | 1.89989700  | 1.64764500  | -3.25013900 |
| H | 2.26310200  | 0.86376700  | -2.59295800 |
| C | 3.02985300  | 1.97906700  | -4.23433300 |
| H | 3.25999100  | 1.10937800  | -4.85299000 |
| H | 3.94495800  | 2.27028800  | -3.71778900 |
| H | 2.73972100  | 2.79769300  | -4.89674500 |
| C | 0.68550100  | 1.07466200  | -3.98605400 |
| H | 0.94627300  | 0.12083700  | -4.44235300 |
| H | 0.34551800  | 1.73539600  | -4.78588400 |
| H | -0.15162100 | 0.89919300  | -3.31137200 |
| C | 2.43925300  | 4.50077300  | 0.98022600  |
| H | 3.25982300  | 3.80389600  | 1.13352900  |
| C | 3.00567900  | 5.92035700  | 1.10769900  |
| H | 2.21239700  | 6.66853300  | 1.07088500  |
| H | 3.71249200  | 6.15433100  | 0.31088200  |
| H | 3.51983200  | 6.03503200  | 2.06396400  |
| C | 1.40007200  | 4.24746300  | 2.07912700  |
| H | 0.97729500  | 3.24947800  | 2.00311700  |
| H | 0.58149800  | 4.96602700  | 2.00365400  |
| H | 1.84948600  | 4.35659000  | 3.06808700  |
| C | 4.53204200  | -1.85386000 | -0.29086300 |
| C | 4.32304000  | -2.40414200 | -1.56767800 |
| C | 4.38309500  | -3.79034700 | -1.70568800 |
| H | 4.22197800  | -4.22944200 | -2.68060300 |
| C | 4.63963700  | -4.61167800 | -0.62456500 |
| H | 4.68357900  | -5.68549800 | -0.75398800 |
| C | 4.82638700  | -4.05445500 | 0.62984800  |
| H | 5.00932900  | -4.70453000 | 1.47245600  |
| C | 4.76947000  | -2.67729000 | 0.82554700  |
| C | 4.05216000  | -1.57147800 | -2.80894900 |
| H | 3.90976000  | -0.53744000 | -2.50329700 |
| C | 5.24167400  | -1.61059000 | -3.77928500 |
| H | 5.39928200  | -2.62191300 | -4.15939900 |
| H | 6.16831900  | -1.28844000 | -3.30665600 |
| H | 5.05202900  | -0.95797900 | -4.63357000 |
| C | 2.77673000  | -2.02318500 | -3.52929300 |
| H | 1.91260800  | -1.98541200 | -2.87052300 |
| H | 2.87854600  | -3.03993900 | -3.91238600 |
| H | 2.58912500  | -1.37443600 | -4.38593100 |
| C | 4.96222200  | -2.10158900 | 2.21659900  |
| H | 4.28076800  | -1.25749600 | 2.29240800  |
| C | 6.38034900  | -1.56488000 | 2.45468800  |
| H | 6.48194400  | -1.22681900 | 3.48770600  |
| H | 6.61682200  | -0.72301600 | 1.81007500  |
| H | 7.12263500  | -2.34672200 | 2.28025200  |
| C | 4.60315100  | -3.07875000 | 3.33818000  |
| H | 3.61602400  | -3.51611900 | 3.19662000  |
| H | 4.60808400  | -2.55539600 | 4.29489700  |
| H | 5.33049100  | -3.88922800 | 3.41253000  |
| C | 0.51399400  | 0.68851100  | 1.90264300  |
| C | 2.60606200  | 1.04504600  | 3.07986600  |
| H | 2.05560500  | 1.88342800  | 3.51137300  |
| C | 4.03207900  | 1.50712200  | 2.79858400  |
| H | 4.65877400  | 0.71100200  | 2.39807600  |
| H | 4.49751400  | 1.84476200  | 3.72536100  |
| H | 4.05673500  | 2.34040300  | 2.09780400  |
| C | 2.58424400  | -0.07185300 | 4.12547700  |
| H | 1.55956100  | -0.29906200 | 4.40228100  |
| H | 3.12615800  | 0.24759900  | 5.01938100  |
| H | 3.05300300  | -0.97885100 | 3.75525900  |
| C | -1.44636000 | 0.94058900  | 3.29569700  |
| H | -2.04001700 | 0.80133400  | 2.38364300  |

|   |             |             |             |
|---|-------------|-------------|-------------|
| C | -1.72875700 | 2.33812300  | 3.84755900  |
| H | -2.79180900 | 2.47186700  | 4.05517100  |
| H | -1.41405900 | 3.10394800  | 3.14039500  |
| H | -1.17123500 | 2.48534200  | 4.77423600  |
| C | -1.86179200 | -0.12554900 | 4.30763300  |
| H | -2.91574300 | -0.02500200 | 4.56938600  |
| H | -1.26187800 | -0.02281700 | 5.21405900  |
| H | -1.70504000 | -1.12375100 | 3.90457500  |
| O | 1.71832100  | -0.57045000 | -0.86950500 |
| C | 0.41373300  | -0.57884500 | -0.74601800 |
| O | -0.27856000 | -1.40208000 | -1.31487200 |

Cartesian coordinates of the optimized geometry for **11** at B3LYP-D3BJ/def2-TZVP level of theory (number of imaginary frequencies = 0):

|    |             |             |             |
|----|-------------|-------------|-------------|
| Ga | 1.84270400  | 0.21633200  | 0.12488000  |
| Ga | -2.26851500 | -0.21537700 | -0.09823500 |
| Cl | 1.76498100  | 0.40040600  | -2.09130200 |
| P  | -0.16619400 | -0.76172200 | 0.66584800  |
| N  | 2.73360300  | 1.79357900  | 0.87581900  |
| N  | 3.28477700  | -1.08192600 | 0.62683800  |
| N  | -3.15715800 | -1.80073400 | -0.83625700 |
| N  | -3.42853900 | 1.11869400  | -0.91112800 |
| N  | -0.73765200 | 0.01498700  | 3.38390600  |
| C  | 3.66614800  | 1.67304300  | 1.82450300  |
| C  | 4.26620800  | 0.47088800  | 2.18494900  |
| H  | 4.99925400  | 0.53467900  | 2.97442900  |
| C  | 4.17203500  | -0.78309900 | 1.56111800  |
| C  | 4.11528200  | 2.89994900  | 2.57516100  |
| H  | 5.06907800  | 2.72232100  | 3.06524100  |
| H  | 3.37640500  | 3.14075800  | 3.34126800  |
| H  | 4.19878700  | 3.76876800  | 1.92752300  |
| C  | 5.19170200  | -1.79532300 | 2.02147900  |
| H  | 6.18973300  | -1.36233500 | 1.96045100  |
| H  | 5.16627600  | -2.71205200 | 1.44325100  |
| H  | 5.00819800  | -2.03493700 | 3.06964400  |
| C  | 2.37913500  | 3.10292600  | 0.39723800  |
| C  | 3.07891900  | 3.61768100  | -0.71071500 |
| C  | 2.74923200  | 4.89368700  | -1.15927100 |
| H  | 3.27509400  | 5.31195400  | -2.00637400 |
| C  | 1.74856100  | 5.63347000  | -0.54673600 |
| H  | 1.49981800  | 6.61953100  | -0.91832900 |
| C  | 1.06474600  | 5.10607300  | 0.53462900  |
| H  | 0.27904100  | 5.68224700  | 1.00418200  |
| C  | 1.37178500  | 3.84123000  | 1.03510600  |
| C  | 4.20027100  | 2.84005000  | -1.37864800 |
| H  | 4.05738000  | 1.78968100  | -1.13707800 |
| C  | 5.57123700  | 3.25466000  | -0.82649300 |
| H  | 6.36405000  | 2.68481300  | -1.31600100 |
| H  | 5.64622100  | 3.07539200  | 0.24546500  |
| H  | 5.75721400  | 4.31623300  | -1.00468200 |
| C  | 4.17856600  | 2.95449500  | -2.90412000 |
| H  | 4.42915300  | 3.96205900  | -3.24150800 |
| H  | 3.20069500  | 2.68704900  | -3.30053700 |
| H  | 4.91543100  | 2.27447300  | -3.33510800 |
| C  | 0.62694300  | 3.31703200  | 2.24615900  |
| H  | 1.07040100  | 2.36376400  | 2.52554200  |
| C  | 0.74043800  | 4.26047800  | 3.45052600  |
| H  | 1.77628800  | 4.50859600  | 3.68515500  |
| H  | 0.29026100  | 3.79495300  | 4.32907400  |
| H  | 0.21170300  | 5.19766100  | 3.26669600  |
| C  | -0.84281000 | 3.06332000  | 1.92027200  |
| H  | -1.34873000 | 3.98934400  | 1.65345800  |
| H  | -1.34918100 | 2.61754100  | 2.77357000  |
| H  | -0.93759300 | 2.37874900  | 1.08120800  |
| C  | 3.30775300  | -2.36069000 | -0.03496100 |
| C  | 3.97733500  | -2.45976500 | -1.26982900 |

|   |             |             |             |
|---|-------------|-------------|-------------|
| C | 3.96679000  | -3.68530300 | -1.93014600 |
| H | 4.47371000  | -3.78061000 | -2.88017200 |
| C | 3.31482700  | -4.78366200 | -1.39353300 |
| H | 3.31007500  | -5.72598500 | -1.92660900 |
| C | 2.67044300  | -4.67185200 | -0.17455800 |
| H | 2.16607200  | -5.53292100 | 0.24198400  |
| C | 2.65500300  | -3.47051700 | 0.53382400  |
| C | 4.75894300  | -1.29537200 | -1.85407500 |
| H | 4.35648700  | -0.38044400 | -1.42687300 |
| C | 6.24016000  | -1.37658400 | -1.45832400 |
| H | 6.78809600  | -0.52351300 | -1.86458800 |
| H | 6.69553700  | -2.28934100 | -1.84900400 |
| H | 6.37077400  | -1.37527700 | -0.37745200 |
| C | 4.62248200  | -1.18065700 | -3.37367000 |
| H | 5.07351700  | -0.24722800 | -3.71439300 |
| H | 3.57638400  | -1.17755300 | -3.67347900 |
| H | 5.13287700  | -1.99602000 | -3.89001700 |
| C | 1.99420400  | -3.44313100 | 1.90234500  |
| H | 1.94076800  | -2.40638700 | 2.22872600  |
| C | 2.81826500  | -4.22993200 | 2.93407100  |
| H | 3.84701200  | -3.88362600 | 3.00081400  |
| H | 2.84339200  | -5.29005000 | 2.67334200  |
| H | 2.36372300  | -4.13924200 | 3.92239400  |
| C | 0.56930000  | -4.00046600 | 1.87503200  |
| H | 0.56625300  | -5.07129200 | 1.66945800  |
| H | -0.03615500 | -3.50452500 | 1.12347400  |
| H | 0.09072800  | -3.85262500 | 2.84418500  |
| C | -4.26614000 | -1.73383700 | -1.56192000 |
| C | -4.87350100 | -0.53129700 | -1.93827800 |
| H | -5.75855600 | -0.62917100 | -2.54594700 |
| C | -4.48759800 | 0.77773100  | -1.65188900 |
| C | -4.94060600 | -3.00348800 | -2.01090200 |
| H | -4.22273900 | -3.73318800 | -2.37821100 |
| H | -5.67390800 | -2.79349800 | -2.78542000 |
| H | -5.45398300 | -3.46307600 | -1.16522800 |
| C | -5.36141000 | 1.86360800  | -2.22586000 |
| H | -6.03059200 | 2.25107300  | -1.45802700 |
| H | -5.96728600 | 1.46690400  | -3.03659300 |
| H | -4.77402900 | 2.70257000  | -2.59048000 |
| C | -2.56702200 | -3.08990400 | -0.59215200 |
| C | -1.55796600 | -3.53715200 | -1.46382500 |
| C | -1.08068200 | -4.83405000 | -1.29610900 |
| H | -0.30618600 | -5.20455800 | -1.95179800 |
| C | -1.56776800 | -5.65172100 | -0.28736900 |
| H | -1.18857500 | -6.65992800 | -0.17830800 |
| C | -2.50079800 | -5.16169500 | 0.60904200  |
| H | -2.83439200 | -5.78622200 | 1.42720800  |
| C | -3.00872400 | -3.86874400 | 0.48592500  |
| C | -0.99583700 | -2.64160500 | -2.55620000 |
| H | -1.07806700 | -1.61094500 | -2.20668000 |
| C | -1.79529300 | -2.74430600 | -3.86204100 |
| H | -1.34483700 | -2.10915200 | -4.62732800 |
| H | -2.82973400 | -2.42754000 | -3.73712300 |
| H | -1.79629700 | -3.77207200 | -4.23256100 |
| C | 0.48844200  | -2.89655200 | -2.81812300 |
| H | 0.88469900  | -2.12110400 | -3.47224400 |
| H | 0.65685400  | -3.85968100 | -3.30334600 |
| H | 1.06321600  | -2.87622100 | -1.89495200 |
| C | -3.97206300 | -3.33840400 | 1.53247900  |
| H | -4.30647300 | -2.35070500 | 1.21687800  |
| C | -5.21249700 | -4.22475500 | 1.69582200  |
| H | -4.94826400 | -5.21119300 | 2.08143200  |
| H | -5.73829700 | -4.37099800 | 0.75110700  |
| H | -5.90851400 | -3.77024300 | 2.40328200  |
| C | -3.25388600 | -3.16584000 | 2.87798100  |
| H | -2.39708800 | -2.50311500 | 2.78729900  |
| H | -2.90896600 | -4.12984300 | 3.25859900  |
| H | -3.93065100 | -2.73041600 | 3.61518500  |

|   |             |             |             |
|---|-------------|-------------|-------------|
| C | -3.20080300 | 2.51779200  | -0.65711300 |
| C | -2.22808800 | 3.19341700  | -1.41733100 |
| C | -2.07713000 | 4.56199100  | -1.20886900 |
| H | -1.33489100 | 5.10782700  | -1.77014100 |
| C | -2.85255100 | 5.23743900  | -0.27867300 |
| H | -2.71980300 | 6.30263100  | -0.13674000 |
| C | -3.77397000 | 4.54553100  | 0.48616100  |
| H | -4.35187600 | 5.07410300  | 1.23238700  |
| C | -3.96472100 | 3.17420800  | 0.32114600  |
| C | -1.36362200 | 2.46370600  | -2.43652000 |
| H | -1.04552800 | 1.52062700  | -1.98158500 |
| C | -2.12356000 | 2.11823100  | -3.72568500 |
| H | -2.51335400 | 3.02444400  | -4.19539400 |
| H | -2.95362900 | 1.43689700  | -3.55540400 |
| H | -1.44486300 | 1.63814000  | -4.43292400 |
| C | -0.08909500 | 3.22652200  | -2.79038900 |
| H | 0.48040600  | 3.49468800  | -1.90428500 |
| H | -0.30918400 | 4.13934600  | -3.34864900 |
| H | 0.54584800  | 2.60092100  | -3.41425100 |
| C | -4.96732900 | 2.45689500  | 1.21075700  |
| H | -5.09698600 | 1.44341600  | 0.83245000  |
| C | -6.34286800 | 3.13800000  | 1.20601100  |
| H | -7.06459100 | 2.52347200  | 1.74694400  |
| H | -6.72356800 | 3.29924000  | 0.19640400  |
| H | -6.30632300 | 4.10991400  | 1.70111100  |
| C | -4.44123400 | 2.34009100  | 2.64820200  |
| H | -3.53288600 | 1.74388600  | 2.68635800  |
| H | -5.18841200 | 1.85484500  | 3.28024600  |
| H | -4.23799800 | 3.32875300  | 3.06561100  |
| C | -1.11446800 | -0.18267800 | 2.19382400  |
| C | 0.64874200  | -0.15129800 | 3.73954300  |
| H | 1.27727100  | -0.37467100 | 2.86300100  |
| H | 1.02002900  | 0.79231200  | 4.15425100  |
| C | 0.83309900  | -1.25127800 | 4.77865600  |
| H | 1.88460000  | -1.34664600 | 5.05971600  |
| H | 0.24971200  | -1.02914400 | 5.67292400  |
| H | 0.49141700  | -2.20880500 | 4.38487400  |
| O | -2.39894400 | -0.07955600 | 1.81705100  |

Cartesian coordinates of the optimized geometry for CO<sub>2</sub> at B3LYP-D3BJ/6-31G\* level of theory (number of imaginary frequencies = 0):

|   |            |            |             |
|---|------------|------------|-------------|
| C | 0.00000000 | 0.00000000 | 0.00000000  |
| O | 0.00000000 | 0.00000000 | 1.16912200  |
| O | 0.00000000 | 0.00000000 | -1.16912200 |

Cartesian coordinates of the optimized geometry for EtN=C=O at B3LYP-D3BJ/6-31G\* level of theory (number of imaginary frequencies = 0):

|   |             |             |             |
|---|-------------|-------------|-------------|
| C | -1.36399500 | -0.06272500 | -0.00035500 |
| O | -2.54517700 | -0.04673000 | 0.00145300  |
| N | -0.16889400 | -0.22509600 | -0.00297500 |
| C | 1.04037000  | 0.57462300  | -0.00009300 |
| H | 1.04659400  | 1.22483400  | -0.88382000 |
| H | 1.04370800  | 1.22342300  | 0.88468500  |
| C | 2.27380700  | -0.32220000 | 0.00112400  |
| H | 3.18190300  | 0.28967400  | 0.00299100  |
| H | 2.28383000  | -0.96399100 | 0.88736000  |
| H | 2.28654900  | -0.96261300 | -0.88607300 |

Cartesian coordinates of the optimized geometry for **1** at B3LYP-D3BJ/6-31G\* level of theory (number of imaginary frequencies = 0):

|    |             |             |             |
|----|-------------|-------------|-------------|
| Cl | -1.04817900 | -1.76883200 | 2.35783400  |
| P  | -0.16137300 | 0.65776100  | -0.72022700 |
| Ga | -1.52793900 | -0.67708600 | 0.45603700  |

|    |             |             |             |
|----|-------------|-------------|-------------|
| Ga | 1.78364900  | 0.60967400  | 0.22138500  |
| N  | -3.22104600 | 0.25363500  | 0.94021200  |
| N  | -2.47978800 | -2.09251400 | -0.57994000 |
| N  | 2.81044100  | 2.19263800  | -0.35675300 |
| N  | 3.34499600  | -0.25391100 | 0.98758100  |
| C  | -4.36749100 | -0.42282600 | 1.06801100  |
| C  | -4.57279500 | -1.71167700 | 0.56487000  |
| H  | -5.54789600 | -2.14321800 | 0.74812100  |
| C  | -3.73908800 | -2.43176600 | -0.30403600 |
| C  | -5.55418100 | 0.24541900  | 1.72767700  |
| H  | -5.31012800 | 0.53991200  | 2.75267500  |
| H  | -6.41288100 | -0.42802900 | 1.75034200  |
| H  | -5.83806600 | 1.15972400  | 1.19919700  |
| C  | -4.36286600 | -3.63153200 | -0.98415400 |
| H  | -5.44989600 | -3.60097400 | -0.88897700 |
| H  | -4.00612900 | -4.56105200 | -0.53161100 |
| H  | -4.09952300 | -3.66937800 | -2.04329000 |
| C  | -3.26707700 | 1.66998100  | 1.18320800  |
| C  | -3.06479600 | 2.17621500  | 2.48170500  |
| C  | -3.24639900 | 3.54574500  | 2.69927400  |
| H  | -3.10078100 | 3.94866700  | 3.69712600  |
| C  | -3.61047400 | 4.39768800  | 1.66168100  |
| H  | -3.75712100 | 5.45764800  | 1.85159600  |
| C  | -3.76624600 | 3.88890800  | 0.37636500  |
| H  | -4.03503100 | 4.55724300  | -0.43678100 |
| C  | -3.59357000 | 2.52645700  | 0.11175100  |
| C  | -3.80668500 | 2.00679200  | -1.30224600 |
| H  | -3.55695200 | 0.94362400  | -1.31266900 |
| C  | -5.27990800 | 2.12637100  | -1.72934800 |
| H  | -5.93782000 | 1.56295200  | -1.05915300 |
| H  | -5.41758500 | 1.73292900  | -2.74309600 |
| H  | -5.61150000 | 3.17133200  | -1.72600800 |
| C  | -2.88131100 | 2.71863700  | -2.30053100 |
| H  | -3.10264100 | 3.79096800  | -2.35899300 |
| H  | -3.01630700 | 2.30120500  | -3.30466100 |
| H  | -1.83303600 | 2.60082500  | -2.01497000 |
| C  | -1.76356500 | -2.84497500 | -1.57105700 |
| C  | -1.23933200 | -4.11341600 | -1.24979700 |
| C  | -0.59925500 | -4.84005100 | -2.26011200 |
| H  | -0.19401100 | -5.82137900 | -2.03123200 |
| C  | -0.46220400 | -4.32309000 | -3.54271600 |
| H  | 0.03958700  | -4.90127800 | -4.31400800 |
| C  | -0.95732400 | -3.05458500 | -3.83365900 |
| H  | -0.83472200 | -2.65394900 | -4.83380700 |
| C  | -1.61509000 | -2.29335100 | -2.86287000 |
| C  | -1.30529700 | -4.68753800 | 0.15813700  |
| H  | -1.97205300 | -4.06517800 | 0.75866900  |
| C  | -1.83065700 | -6.13259300 | 0.19385900  |
| H  | -1.95804400 | -6.45820800 | 1.23236900  |
| H  | -1.12943400 | -6.82762700 | -0.28233300 |
| H  | -2.79379800 | -6.23948100 | -0.31677800 |
| C  | 0.08190100  | -4.61563000 | 0.80922600  |
| H  | 0.47175000  | -3.59770400 | 0.80278300  |
| H  | 0.79072600  | -5.25931600 | 0.27639500  |
| H  | 0.03861700  | -4.94418900 | 1.85332900  |
| C  | -2.20715000 | -0.93295400 | -3.20881600 |
| H  | -2.09911400 | -0.30189300 | -2.32431700 |
| C  | -3.71020800 | -1.03240100 | -3.52386700 |
| H  | -4.28509300 | -1.35043500 | -2.65046900 |
| H  | -3.89351200 | -1.74361100 | -4.33827800 |
| H  | -4.09699300 | -0.05524100 | -3.83528300 |
| C  | -1.46382400 | -0.22514600 | -4.34640100 |
| H  | -1.81771900 | 0.80625100  | -4.43503700 |
| H  | -1.63037200 | -0.71348200 | -5.31409300 |
| H  | -0.38988000 | -0.19414200 | -4.15046400 |
| C  | 4.07118300  | 2.47355200  | -0.04849800 |
| C  | 4.89623900  | 1.58115100  | 0.65121500  |
| H  | 5.91569000  | 1.90070600  | 0.82058100  |

|   |             |             |             |
|---|-------------|-------------|-------------|
| C | 4.57711700  | 0.28302700  | 1.05093300  |
| C | 4.67452800  | 3.77170700  | -0.52403500 |
| H | 4.04586900  | 4.61881000  | -0.23669800 |
| H | 4.73980600  | 3.78643700  | -1.61668100 |
| H | 5.67561100  | 3.91198400  | -0.11173600 |
| C | 5.72644400  | -0.58054200 | 1.52365600  |
| H | 6.64801400  | 0.00246700  | 1.56228800  |
| H | 5.87127300  | -1.41753400 | 0.83243700  |
| H | 5.54280000  | -1.01878600 | 2.50677200  |
| C | 2.08601700  | 3.03697800  | -1.26877500 |
| C | 2.15950500  | 2.74753300  | -2.64504000 |
| C | 1.33717000  | 3.47266200  | -3.51177700 |
| H | 1.36576400  | 3.25983200  | -4.57659900 |
| C | 0.47009700  | 4.44898800  | -3.02763900 |
| H | -0.17267600 | 4.99273700  | -3.71426300 |
| C | 0.42611700  | 4.72833300  | -1.66474600 |
| H | -0.25635100 | 5.48662000  | -1.29256000 |
| C | 1.22774900  | 4.02603400  | -0.76002000 |
| C | 3.09706800  | 1.67755400  | -3.19200500 |
| H | 3.68777200  | 1.28094000  | -2.36060900 |
| C | 4.08302300  | 2.25962500  | -4.21880400 |
| H | 3.55962200  | 2.63155900  | -5.10668000 |
| H | 4.79043200  | 1.48978900  | -4.54807400 |
| H | 4.65777000  | 3.09371100  | -3.80070600 |
| C | 2.31859100  | 0.49511600  | -3.78973100 |
| H | 1.63011300  | 0.07265800  | -3.05338100 |
| H | 3.01070400  | -0.29022400 | -4.11717300 |
| H | 1.73173900  | 0.80992500  | -4.66016700 |
| C | 1.15482500  | 4.32935300  | 0.72776400  |
| H | 1.86777000  | 3.67881600  | 1.24468800  |
| C | 1.55652200  | 5.78370200  | 1.02933700  |
| H | 0.85938300  | 6.49002500  | 0.56440800  |
| H | 2.56099900  | 6.01818200  | 0.65831500  |
| H | 1.54233800  | 5.96578000  | 2.11013300  |
| C | -0.23928100 | 4.02426700  | 1.28828500  |
| H | -0.24326800 | 4.12468300  | 2.37896100  |
| H | -0.55965000 | 3.01369800  | 1.02565900  |
| H | -0.98443900 | 4.71924700  | 0.89080500  |
| C | 3.20995700  | -1.64116500 | 1.34887800  |
| C | 3.27411900  | -2.60485500 | 0.32912500  |
| C | 3.25860800  | -3.95308100 | 0.70388200  |
| H | 3.31475900  | -4.71859500 | -0.06388300 |
| C | 3.15281800  | -4.32256100 | 2.03857900  |
| H | 3.13190400  | -5.37393300 | 2.31047300  |
| C | 3.05459400  | -3.34814400 | 3.03113000  |
| H | 2.96275100  | -3.65467000 | 4.06657000  |
| C | 3.09015200  | -1.98943500 | 2.71136800  |
| C | 3.05126700  | -0.90121500 | 3.78014900  |
| H | 3.86819500  | -0.20074000 | 3.56435200  |
| C | 1.74757300  | -0.09706900 | 3.70852100  |
| H | 1.79001700  | 0.77508400  | 4.36967900  |
| H | 0.89011300  | -0.71442400 | 3.97908200  |
| H | 1.57308600  | 0.25372200  | 2.68893200  |
| C | 3.27524500  | -1.41964800 | 5.20473900  |
| H | 3.32416900  | -0.57546300 | 5.90070400  |
| H | 4.20858500  | -1.98688200 | 5.29322300  |
| H | 2.45104700  | -2.06393600 | 5.53079200  |
| C | 3.36140100  | -2.22466400 | -1.14286300 |
| H | 3.43099100  | -1.13565000 | -1.22432800 |
| C | 4.62507500  | -2.79457800 | -1.80823300 |
| H | 4.61728400  | -3.89027100 | -1.80992000 |
| H | 4.68575400  | -2.46166900 | -2.85066600 |
| H | 5.53585000  | -2.46750300 | -1.29347100 |
| C | 2.09883200  | -2.66788100 | -1.89554300 |
| H | 1.19237100  | -2.21997500 | -1.48006400 |
| H | 2.16110000  | -2.37189900 | -2.94730300 |
| H | 1.98305200  | -3.75484200 | -1.86351400 |
| C | -2.63310100 | 1.27539300  | 3.62576200  |

|   |             |            |            |
|---|-------------|------------|------------|
| H | -2.75354500 | 0.23655600 | 3.31115500 |
| C | -1.14032500 | 1.48887000 | 3.91727200 |
| H | -0.80191000 | 0.78936800 | 4.68746800 |
| H | -0.53461500 | 1.32690900 | 3.02263900 |
| H | -0.95472400 | 2.51018800 | 4.27284700 |
| C | -3.46670500 | 1.47585200 | 4.90085300 |
| H | -3.17381200 | 0.74001400 | 5.65816700 |
| H | -3.31807600 | 2.47110800 | 5.33555500 |
| H | -4.53884900 | 1.35523200 | 4.70859700 |

Cartesian coordinates of the optimized geometry for **TS<sub>1-10</sub>** at B3LYP-D3BJ/6-31G\* level of theory (number of imaginary frequencies = 1):

|    |             |             |             |
|----|-------------|-------------|-------------|
| Cl | -1.58512700 | -0.53035600 | 2.36424100  |
| P  | 0.15006000  | 0.47891300  | -0.98808900 |
| Ga | -1.61963000 | 0.55640200  | 0.41211200  |
| Ga | 1.66647700  | -0.90653900 | -0.23290800 |
| N  | -2.04788500 | 2.44586500  | 0.92724500  |
| N  | -3.42732700 | 0.19797100  | -0.31631900 |
| N  | 3.47368900  | -0.36855200 | -0.77947700 |
| N  | 2.16794400  | -2.58079000 | 0.57426400  |
| C  | -3.30262800 | 2.86926000  | 1.08499800  |
| C  | -4.43597100 | 2.10565000  | 0.77511700  |
| H  | -5.38724800 | 2.57353200  | 0.99035000  |
| C  | -4.49644700 | 0.91417100  | 0.04586700  |
| C  | -3.57758600 | 4.26818400  | 1.59558300  |
| H  | -3.53017700 | 4.28785100  | 2.68843600  |
| H  | -4.57706600 | 4.59033300  | 1.29697800  |
| H  | -2.84580400 | 4.98810800  | 1.22715100  |
| C  | -5.87171100 | 0.50062400  | -0.42898400 |
| H  | -6.59354400 | 1.29844100  | -0.24668700 |
| H  | -6.21313000 | -0.39688800 | 0.09065600  |
| H  | -5.86239800 | 0.26802600  | -1.49628900 |
| C  | -0.98184700 | 3.38251100  | 1.16532400  |
| C  | -0.59203000 | 3.69519200  | 2.48584700  |
| C  | 0.39426000  | 4.67057300  | 2.66967800  |
| H  | 0.70014700  | 4.92953700  | 3.67896800  |
| C  | 0.99581200  | 5.30423200  | 1.58769100  |
| H  | 1.76182700  | 6.05741200  | 1.75343200  |
| C  | 0.61536200  | 4.96790400  | 0.29259500  |
| H  | 1.08552200  | 5.46388000  | -0.55005900 |
| C  | -0.38345300 | 4.01803900  | 0.05556200  |
| C  | -0.88093000 | 3.78787900  | -1.36470300 |
| H  | -1.40342900 | 2.83041600  | -1.38704300 |
| C  | -1.90189000 | 4.87086000  | -1.75831300 |
| H  | -2.78579900 | 4.84563200  | -1.11335000 |
| H  | -2.23748800 | 4.72238400  | -2.79087100 |
| H  | -1.45692000 | 5.87037600  | -1.68578400 |
| C  | 0.25882500  | 3.71485600  | -2.38890000 |
| H  | 0.71453900  | 4.69684400  | -2.56459700 |
| H  | -0.12839800 | 3.35797500  | -3.35043000 |
| H  | 1.03644200  | 3.02501700  | -2.05819800 |
| C  | -3.62735600 | -0.89733700 | -1.22783600 |
| C  | -4.13423800 | -2.11981700 | -0.73772900 |
| C  | -4.36483800 | -3.15459500 | -1.65065300 |
| H  | -4.74956600 | -4.10448200 | -1.29111000 |
| C  | -4.10960100 | -2.98403200 | -3.00450800 |
| H  | -4.29406500 | -3.79651700 | -3.70215400 |
| C  | -3.61444000 | -1.76911000 | -3.47035700 |
| H  | -3.41646000 | -1.65815100 | -4.52867000 |
| C  | -3.36009400 | -0.69925200 | -2.60573500 |
| C  | -4.43663500 | -2.35447500 | 0.73912800  |
| H  | -4.35498100 | -1.40103100 | 1.26612200  |
| C  | -5.85164900 | -2.91684800 | 0.96864600  |
| H  | -6.07324500 | -2.94509500 | 2.04148900  |
| H  | -5.93876000 | -3.94180100 | 0.59042700  |
| H  | -6.62819200 | -2.32260800 | 0.47594700  |



|   |             |             |             |
|---|-------------|-------------|-------------|
| C | -3.40373400 | -3.29655400 | 1.36992800  |
| H | -2.39297800 | -2.91285000 | 1.24745400  |
| H | -3.45878500 | -4.29374000 | 0.91707600  |
| H | -3.58694400 | -3.40129700 | 2.44530800  |
| C | -2.81292500 | 0.62447300  | -3.15495600 |
| H | -1.86476300 | 0.81355000  | -2.63622700 |
| C | -3.73281500 | 1.83830300  | -2.90908200 |
| H | -3.76570900 | 2.14316100  | -1.86502500 |
| H | -4.75518500 | 1.63267200  | -3.24845200 |
| H | -3.36435800 | 2.69459800  | -3.48440700 |
| C | -2.48306700 | 0.58219800  | -4.65458500 |
| H | -1.99765100 | 1.52266800  | -4.93778000 |
| H | -3.39174300 | 0.48714200  | -5.26262400 |
| H | -1.80337100 | -0.23175900 | -4.90722900 |
| C | 4.51890100  | -1.18827800 | -0.74317500 |
| C | 4.44072300  | -2.51385400 | -0.28379900 |
| H | 5.34894400  | -3.09564300 | -0.36556400 |
| C | 3.37216100  | -3.14133300 | 0.35797500  |
| C | 5.87471000  | -0.67598800 | -1.16255100 |
| H | 6.16264500  | 0.17692000  | -0.53898200 |
| H | 5.85973700  | -0.31613100 | -2.19378000 |
| H | 6.63347100  | -1.45473300 | -1.06912600 |
| C | 3.62308700  | -4.52711400 | 0.90372100  |
| H | 4.60361800  | -4.89053700 | 0.59209000  |
| H | 2.85752800  | -5.22821900 | 0.56166600  |
| H | 3.58043900  | -4.52650900 | 1.99752900  |
| C | 3.65725300  | 1.00873100  | -1.16282100 |
| C | 3.63494600  | 1.38571200  | -2.52014700 |
| C | 3.80036200  | 2.74042000  | -2.82785800 |
| H | 3.78421100  | 3.05115100  | -3.86826500 |
| C | 3.95696700  | 3.69636700  | -1.82932400 |
| H | 4.07018700  | 4.74457600  | -2.09157800 |
| C | 3.95076400  | 3.30661200  | -0.49465500 |
| H | 4.05004700  | 4.05471200  | 0.28566600  |
| C | 3.80800700  | 1.96187000  | -0.13952700 |
| C | 3.39492200  | 0.39111000  | -3.64650800 |
| H | 3.30744700  | -0.60705300 | -3.21166900 |
| C | 4.54691800  | 0.36564300  | -4.66559400 |
| H | 4.65781200  | 1.33417800  | -5.16607700 |
| H | 4.35060600  | -0.38637100 | -5.43823500 |
| H | 5.50814200  | 0.12455600  | -4.19884000 |
| C | 2.06608300  | 0.70522700  | -4.35797300 |
| H | 1.24971700  | 0.80600000  | -3.63956500 |
| H | 1.81108900  | -0.08999200 | -5.06755100 |
| H | 2.13377700  | 1.64582200  | -4.91711900 |
| C | 3.79486600  | 1.57094300  | 1.32930300  |
| H | 3.72914900  | 0.48100600  | 1.40496400  |
| C | 5.09047700  | 1.98222400  | 2.04776800  |
| H | 5.21972100  | 3.07028500  | 2.04880200  |
| H | 5.97292700  | 1.54164600  | 1.56944300  |
| H | 5.06727300  | 1.64928100  | 3.09189700  |
| C | 2.56639400  | 2.17563500  | 2.01679000  |
| H | 2.50372800  | 1.84903700  | 3.05758700  |
| H | 1.63979900  | 1.89919600  | 1.50517300  |
| H | 2.61966900  | 3.26596300  | 2.01340000  |
| C | 1.24054100  | -3.27341700 | 1.43633600  |
| C | 0.31033400  | -4.17140100 | 0.88410000  |
| C | -0.55819600 | -4.83225300 | 1.75831900  |
| H | -1.28561300 | -5.52942500 | 1.35561200  |
| C | -0.51804500 | -4.59702800 | 3.12833500  |
| H | -1.21563800 | -5.10594400 | 3.78727500  |
| C | 0.41934600  | -3.71332100 | 3.65454000  |
| H | 0.45126900  | -3.53975500 | 4.72563700  |
| C | 1.32679800  | -3.05171300 | 2.82343500  |
| C | 2.37631300  | -2.12097200 | 3.41236800  |
| H | 3.12137900  | -1.91207400 | 2.63866300  |
| C | 1.73901300  | -0.78274200 | 3.80125900  |
| H | 2.49641600  | -0.08630000 | 4.17733200  |

|   |             |             |             |
|---|-------------|-------------|-------------|
| H | 0.97913700  | -0.92002800 | 4.57777300  |
| H | 1.23474600  | -0.32825400 | 2.94599100  |
| C | 3.12304800  | -2.74732000 | 4.59991300  |
| H | 3.92895600  | -2.08223600 | 4.93038100  |
| H | 3.56633300  | -3.71363800 | 4.33356600  |
| H | 2.46017800  | -2.90959000 | 5.45675100  |
| C | 0.24617900  | -4.43982700 | -0.61081000 |
| H | 1.09781600  | -3.94810700 | -1.08288500 |
| C | 0.34973400  | -5.93907900 | -0.93737800 |
| H | -0.50604400 | -6.49881500 | -0.54365000 |
| H | 0.36824000  | -6.08557800 | -2.02320200 |
| H | 1.25918800  | -6.38627200 | -0.51998300 |
| C | -1.03376400 | -3.85200400 | -1.22340500 |
| H | -1.18774300 | -2.80272900 | -0.95610000 |
| H | -1.00851800 | -3.92181700 | -2.31535600 |
| H | -1.91539000 | -4.40027200 | -0.88081500 |
| C | -1.20781800 | 3.02492700  | 3.70825400  |
| H | -2.05791700 | 2.42142000  | 3.37977000  |
| C | -0.20584400 | 2.05977200  | 4.35663000  |
| H | -0.66367600 | 1.54897400  | 5.21161900  |
| H | 0.09921600  | 1.30200000  | 3.63899300  |
| H | 0.68436400  | 2.59352200  | 4.71024500  |
| C | -1.70507300 | 4.04238500  | 4.75057400  |
| H | -2.25743500 | 3.52660400  | 5.54409600  |
| H | -0.86881800 | 4.56888600  | 5.22453000  |
| H | -2.36211400 | 4.80139300  | 4.31400600  |
| O | 1.48835500  | -1.99248400 | -2.33889200 |
| C | 0.44288400  | -1.54317300 | -2.74972800 |
| O | -0.43954100 | -1.49966400 | -3.52672600 |

Cartesian coordinates of the optimized geometry for **10** at B3LYP-D3BJ/6-31G\* level of theory (number of imaginary frequencies = 0):

|    |             |             |             |
|----|-------------|-------------|-------------|
| Cl | 1.61952000  | 1.16711300  | 2.94759000  |
| P  | 0.23072100  | -0.67231400 | -0.23568600 |
| Ga | 1.79883700  | 0.65229800  | 0.78237500  |
| Ga | -2.05642500 | -0.42554000 | -0.20340400 |
| N  | 3.46046600  | -0.40778600 | 0.83546100  |
| N  | 2.63801700  | 2.20541600  | -0.04941000 |
| N  | -2.84831000 | -2.15741700 | -0.66647600 |
| N  | -3.69003700 | 0.38819500  | 0.40939300  |
| C  | 4.61493800  | 0.21566900  | 1.03442200  |
| C  | 4.74430100  | 1.61880900  | 0.99190700  |
| H  | 5.69783700  | 2.01554500  | 1.31652900  |
| C  | 3.84980600  | 2.53718500  | 0.43802600  |
| C  | 5.86985200  | -0.57983800 | 1.30504900  |
| H  | 5.96565700  | -0.77654200 | 2.37868100  |
| H  | 6.75286100  | -0.02352000 | 0.98355300  |
| H  | 5.84717000  | -1.54541100 | 0.79678100  |
| C  | 4.29342600  | 3.98025100  | 0.35927400  |
| H  | 5.32642100  | 4.08872400  | 0.69505500  |
| H  | 3.64938200  | 4.59359300  | 1.00040400  |
| H  | 4.20573000  | 4.38139100  | -0.65178000 |
| C  | 3.36744700  | -1.83822300 | 0.77815000  |
| C  | 3.33254300  | -2.59961500 | 1.96178600  |
| C  | 3.18679900  | -3.98828800 | 1.84434100  |
| H  | 3.16393700  | -4.59519700 | 2.74494500  |
| C  | 3.06545600  | -4.59757300 | 0.60133800  |
| H  | 2.95627400  | -5.67675100 | 0.53183600  |
| C  | 3.07997500  | -3.82299400 | -0.55668800 |
| H  | 2.96089400  | -4.30201400 | -1.52159400 |
| C  | 3.21470900  | -2.43566200 | -0.49293900 |
| C  | 3.23322800  | -1.58755900 | -1.75627100 |
| H  | 2.76883000  | -0.62886100 | -1.51133500 |
| C  | 4.67395300  | -1.29012100 | -2.20680400 |
| H  | 5.21994600  | -0.71171100 | -1.45597300 |
| H  | 4.66962800  | -0.70926500 | -3.13551500 |

|   |             |             |             |
|---|-------------|-------------|-------------|
| H | 5.22320100  | -2.22134000 | -2.38981200 |
| C | 2.40983000  | -2.17825300 | -2.90398800 |
| H | 2.88740900  | -3.06487900 | -3.33939200 |
| H | 2.30076000  | -1.43145000 | -3.69522500 |
| H | 1.41063800  | -2.45758000 | -2.56290800 |
| C | 1.97682300  | 3.13543000  | -0.92761100 |
| C | 1.07298400  | 4.06850200  | -0.38857400 |
| C | 0.47274700  | 4.99064900  | -1.25112300 |
| H | -0.23304100 | 5.71315100  | -0.85415100 |
| C | 0.77078300  | 4.99232200  | -2.60939100 |
| H | 0.29830700  | 5.71460800  | -3.26966100 |
| C | 1.66905200  | 4.06227700  | -3.12517500 |
| H | 1.88231500  | 4.06409700  | -4.18845000 |
| C | 2.28678100  | 3.11333500  | -2.30467300 |
| C | 0.72255100  | 4.03012500  | 1.08693400  |
| H | 1.55090800  | 3.56574500  | 1.62508600  |
| C | 0.50648300  | 5.41576100  | 1.70886500  |
| H | 0.37542700  | 5.31810400  | 2.79221200  |
| H | -0.39146400 | 5.90680200  | 1.31642900  |
| H | 1.36055000  | 6.07791100  | 1.52541400  |
| C | -0.51918600 | 3.15633100  | 1.29409200  |
| H | -0.39962900 | 2.16949600  | 0.83791600  |
| H | -1.38766100 | 3.62522300  | 0.83262000  |
| H | -0.71925300 | 3.00556000  | 2.35655800  |
| C | 3.26442600  | 2.10249200  | -2.89472000 |
| H | 3.19972300  | 1.20563300  | -2.27678700 |
| C | 4.72387400  | 2.59572000  | -2.84873100 |
| H | 5.10193400  | 2.68299200  | -1.82800900 |
| H | 4.82228700  | 3.57185400  | -3.33932400 |
| H | 5.37351200  | 1.88783300  | -3.37685900 |
| C | 2.91015600  | 1.69888900  | -4.33391200 |
| H | 3.52082600  | 0.83873600  | -4.63270600 |
| H | 3.12585300  | 2.50487400  | -5.04617200 |
| H | 1.85868100  | 1.42113600  | -4.41307700 |
| C | -4.14063600 | -2.44288400 | -0.57028800 |
| C | -5.10254800 | -1.51210900 | -0.14455300 |
| H | -6.12720500 | -1.85870700 | -0.13821400 |
| C | -4.89004700 | -0.21848600 | 0.32829100  |
| C | -4.62334400 | -3.84298500 | -0.86072800 |
| H | -4.47328000 | -4.46928100 | 0.02670400  |
| H | -4.06906400 | -4.30726400 | -1.67595000 |
| H | -5.68948500 | -3.84230300 | -1.09709900 |
| C | -6.10595700 | 0.53470700  | 0.81638400  |
| H | -7.01062000 | -0.05231500 | 0.65129600  |
| H | -6.20685400 | 1.49544400  | 0.30460100  |
| H | -6.02127300 | 0.75874300  | 1.88460200  |
| C | -1.91074800 | -3.17474800 | -1.05775100 |
| C | -1.57078900 | -3.31400300 | -2.41752500 |
| C | -0.62532400 | -4.29071700 | -2.75195500 |
| H | -0.34905200 | -4.42490700 | -3.79321900 |
| C | -0.02363700 | -5.07776600 | -1.77501100 |
| H | 0.71862600  | -5.81931600 | -2.05676800 |
| C | -0.36708100 | -4.91175600 | -0.43671900 |
| H | 0.12064000  | -5.51522800 | 0.32200900  |
| C | -1.31938000 | -3.96487900 | -0.05321100 |
| C | -2.22568800 | -2.48382200 | -3.51658600 |
| H | -2.80737000 | -1.68377200 | -3.05214400 |
| C | -3.19110100 | -3.34482000 | -4.35379300 |
| H | -2.65769600 | -4.16787700 | -4.84379100 |
| H | -3.65992200 | -2.73644200 | -5.13571400 |
| H | -3.98987300 | -3.78137600 | -3.74559600 |
| C | -1.19550600 | -1.80996000 | -4.43638600 |
| H | -0.48611400 | -1.19645100 | -3.88224800 |
| H | -1.71297300 | -1.15618200 | -5.14728200 |
| H | -0.63238400 | -2.54900000 | -5.01892100 |
| C | -1.68352500 | -3.80330500 | 1.41723600  |
| H | -2.48443500 | -3.06155100 | 1.49854900  |
| C | -2.21785800 | -5.11673800 | 2.01482600  |

|   |             |             |             |
|---|-------------|-------------|-------------|
| H | -1.44326300 | -5.89167200 | 2.02255900  |
| H | -3.06802000 | -5.50603200 | 1.44401400  |
| H | -2.54240500 | -4.96138000 | 3.05008000  |
| C | -0.49792600 | -3.28526100 | 2.24430100  |
| H | -0.80781900 | -3.09876100 | 3.27873800  |
| H | -0.09284100 | -2.35888900 | 1.83327800  |
| H | 0.32281800  | -4.00916300 | 2.25967800  |
| C | -3.64789300 | 1.68990300  | 1.02182700  |
| C | -3.82107700 | 2.83223500  | 0.22009300  |
| C | -3.88848300 | 4.07296300  | 0.86566800  |
| H | -4.02748600 | 4.97279400  | 0.27388700  |
| C | -3.76164700 | 4.17126900  | 2.24823700  |
| H | -3.81171800 | 5.14392400  | 2.72953700  |
| C | -3.55120300 | 3.02762800  | 3.01611600  |
| H | -3.43454200 | 3.11929900  | 4.09127500  |
| C | -3.49708300 | 1.76390800  | 2.42101200  |
| C | -3.27593500 | 0.50447900  | 3.25208600  |
| H | -3.61943800 | -0.35191100 | 2.66331900  |
| C | -1.78079100 | 0.28465700  | 3.54254500  |
| H | -1.63200400 | -0.65464300 | 4.08795800  |
| H | -1.37287300 | 1.09848200  | 4.15076600  |
| H | -1.17883300 | 0.24181700  | 2.63203600  |
| C | -4.08720100 | 0.50333700  | 4.55644200  |
| H | -3.98623100 | -0.46479200 | 5.05923900  |
| H | -5.15223900 | 0.68191500  | 4.36944700  |
| H | -3.73584600 | 1.27026500  | 5.25538200  |
| C | -3.89704900 | 2.74770100  | -1.29870600 |
| H | -3.94023100 | 1.69548400  | -1.59045900 |
| C | -5.15763700 | 3.42909300  | -1.85648000 |
| H | -5.16219700 | 4.50507300  | -1.64831500 |
| H | -5.20155100 | 3.30385400  | -2.94400800 |
| H | -6.07371900 | 3.00386100  | -1.43014400 |
| C | -2.62799900 | 3.34234000  | -1.93396600 |
| H | -1.72478000 | 2.86603000  | -1.55272800 |
| H | -2.64241900 | 3.19159300  | -3.01844200 |
| H | -2.55817400 | 4.41880700  | -1.73814500 |
| C | 3.44703200  | -1.97360300 | 3.34537100  |
| H | 3.65153400  | -0.90716400 | 3.22664600  |
| C | 2.12065700  | -2.08061800 | 4.11481800  |
| H | 2.21042600  | -1.59385400 | 5.09249300  |
| H | 1.31868100  | -1.58259700 | 3.56853900  |
| H | 1.83913700  | -3.12760400 | 4.27694200  |
| C | 4.59311700  | -2.59530700 | 4.16238000  |
| H | 4.72204100  | -2.05367500 | 5.10635000  |
| H | 4.38625200  | -3.64275500 | 4.41001600  |
| H | 5.54337000  | -2.56893100 | 3.61869600  |
| O | -1.54501500 | 0.35700300  | -1.91636200 |
| C | -0.21908100 | 0.27498300  | -1.82938200 |
| O | 0.56704700  | 0.64911700  | -2.67594000 |

Cartesian coordinates of the optimized geometry for **TS<sub>1-4</sub>** at B3LYP-D3BJ/6-31G\* level of theory (number of imaginary frequencies = 1):

|    |             |             |             |
|----|-------------|-------------|-------------|
| Cl | -1.72649900 | -1.04684500 | 2.44577800  |
| P  | -0.15367100 | 0.44844600  | -0.91534700 |
| Ga | -1.84580900 | -0.33821600 | 0.31810600  |
| Ga | 1.80392800  | 0.05037800  | -0.04720200 |
| N  | -3.34602000 | 0.99635700  | 0.41382000  |
| N  | -3.00505300 | -1.72145900 | -0.50941600 |
| N  | 3.04206700  | 1.57773000  | -0.33979700 |
| N  | 2.92381900  | -0.85824000 | 1.25542300  |
| C  | -4.62833000 | 0.63494700  | 0.39060800  |
| C  | -5.07632400 | -0.66871900 | 0.12780600  |
| H  | -6.14519800 | -0.82379100 | 0.19826200  |
| C  | -4.33095600 | -1.74374400 | -0.36471800 |
| C  | -5.71255700 | 1.66645800  | 0.62460700  |
| H  | -5.44516900 | 2.63845900  | 0.20768900  |

|   |             |             |             |
|---|-------------|-------------|-------------|
| H | -5.87598400 | 1.80637800  | 1.69773700  |
| H | -6.65401100 | 1.33473000  | 0.18182900  |
| C | -5.10660200 | -2.97433600 | -0.77986700 |
| H | -6.16872300 | -2.74626000 | -0.88847200 |
| H | -4.99980800 | -3.75262900 | -0.01649300 |
| H | -4.73287200 | -3.39303900 | -1.71579700 |
| C | -3.01581100 | 2.38587800  | 0.56884700  |
| C | -3.07032100 | 2.99620200  | 1.83883900  |
| C | -2.76464500 | 4.35948700  | 1.93113100  |
| H | -2.80696500 | 4.84628400  | 2.90122400  |
| C | -2.39524900 | 5.09357400  | 0.81057500  |
| H | -2.15732800 | 6.15020700  | 0.90373100  |
| C | -2.33000300 | 4.47059400  | -0.43298800 |
| H | -2.03321400 | 5.04709500  | -1.30167600 |
| C | -2.64392500 | 3.11710000  | -0.58204200 |
| C | -2.66063600 | 2.47258400  | -1.96250100 |
| H | -2.37761100 | 1.42697800  | -1.83362000 |
| C | -4.06977500 | 2.48975700  | -2.57901700 |
| H | -4.77980200 | 1.91416300  | -1.97900400 |
| H | -4.04763300 | 2.04572200  | -3.58166700 |
| H | -4.44781100 | 3.51525500  | -2.67047400 |
| C | -1.63418300 | 3.08589000  | -2.91923900 |
| H | -1.90555300 | 4.10575100  | -3.21876100 |
| H | -1.57277800 | 2.48348100  | -3.83105600 |
| H | -0.64498500 | 3.10671300  | -2.45850800 |
| C | -2.36288400 | -2.73519700 | -1.29216300 |
| C | -1.94419300 | -3.93703000 | -0.69175300 |
| C | -1.29989900 | -4.88573800 | -1.49369500 |
| H | -0.97179900 | -5.82105100 | -1.04888600 |
| C | -1.07866500 | -4.65251000 | -2.84738600 |
| H | -0.57376800 | -5.39978100 | -3.45386200 |
| C | -1.52111500 | -3.46658600 | -3.42751900 |
| H | -1.35973600 | -3.29617200 | -4.48752100 |
| C | -2.16719300 | -2.48826400 | -2.66766900 |
| C | -2.20792900 | -4.22726100 | 0.77782700  |
| H | -2.81540000 | -3.41347200 | 1.17926400  |
| C | -2.97930100 | -5.54415500 | 0.97250600  |
| H | -3.24174500 | -5.67547200 | 2.02864600  |
| H | -2.37525800 | -6.40898400 | 0.67353300  |
| H | -3.90264800 | -5.57104600 | 0.38416500  |
| C | -0.90952200 | -4.25369700 | 1.58981100  |
| H | -0.32821800 | -3.34187000 | 1.45247100  |
| H | -0.28522700 | -5.10801900 | 1.30421600  |
| H | -1.12939100 | -4.33988600 | 2.65862200  |
| C | -2.73782200 | -1.24507700 | -3.34045400 |
| H | -3.04966000 | -0.54935900 | -2.55772100 |
| C | -3.99582400 | -1.60134800 | -4.15450200 |
| H | -4.76621000 | -2.06278600 | -3.52885500 |
| H | -3.75475100 | -2.30324300 | -4.96178700 |
| H | -4.42513200 | -0.69930900 | -4.60663700 |
| C | -1.71818000 | -0.51282500 | -4.22061800 |
| H | -2.18308300 | 0.37579600  | -4.66330600 |
| H | -1.35790500 | -1.14101500 | -5.04319400 |
| H | -0.86153100 | -0.19496900 | -3.62500000 |
| C | 4.31882000  | 1.54421700  | 0.01451200  |
| C | 4.89357500  | 0.46369500  | 0.71224000  |
| H | 5.95909800  | 0.53084100  | 0.88749200  |
| C | 4.24038900  | -0.60138700 | 1.34417100  |
| C | 5.20390900  | 2.73105100  | -0.28329100 |
| H | 5.14283900  | 3.01296000  | -1.33791400 |
| H | 6.24362400  | 2.52023800  | -0.02578300 |
| H | 4.87098400  | 3.60154200  | 0.29123600  |
| C | 5.09192800  | -1.47192900 | 2.24067600  |
| H | 6.11715000  | -1.10003600 | 2.27613300  |
| H | 5.10427000  | -2.50777800 | 1.89098200  |
| H | 4.68621000  | -1.49013400 | 3.25592700  |
| C | 2.46519200  | 2.80575200  | -0.82471800 |
| C | 2.41887000  | 3.08359400  | -2.20266100 |

|   |             |             |             |
|---|-------------|-------------|-------------|
| C | 1.83181600  | 4.28320200  | -2.61770200 |
| H | 1.78719000  | 4.51215100  | -3.67854700 |
| C | 1.27874800  | 5.16988100  | -1.69912800 |
| H | 0.81263400  | 6.08934000  | -2.04217200 |
| C | 1.30754900  | 4.86461000  | -0.34239500 |
| H | 0.85021400  | 5.54145300  | 0.37244900  |
| C | 1.90184800  | 3.68651400  | 0.11745500  |
| C | 2.94543000  | 2.10372200  | -3.23700400 |
| H | 3.40698600  | 1.27884200  | -2.69350700 |
| C | 4.01452900  | 2.72236800  | -4.15072200 |
| H | 3.60319100  | 3.54110800  | -4.75129600 |
| H | 4.40650100  | 1.96962000  | -4.84540100 |
| H | 4.85710400  | 3.12443300  | -3.57666900 |
| C | 1.78473800  | 1.51796400  | -4.05732000 |
| H | 1.02042600  | 1.10237100  | -3.39662700 |
| H | 2.13869000  | 0.72640600  | -4.72914000 |
| H | 1.30932500  | 2.28946500  | -4.67352400 |
| C | 1.91617700  | 3.37417800  | 1.60325100  |
| H | 2.45283900  | 2.43499600  | 1.74957200  |
| C | 2.66153600  | 4.44768500  | 2.41257100  |
| H | 2.16380700  | 5.42113500  | 2.33776100  |
| H | 3.69388800  | 4.57350100  | 2.06603700  |
| H | 2.69245300  | 4.17054900  | 3.47265200  |
| C | 0.49097400  | 3.17773000  | 2.13041700  |
| H | 0.51843800  | 2.81131900  | 3.16139200  |
| H | -0.06694100 | 2.46671300  | 1.51525400  |
| H | -0.06748500 | 4.11779700  | 2.12615600  |
| C | 2.38164000  | -1.89103600 | 2.10636900  |
| C | 2.52152600  | -3.23687100 | 1.71420600  |
| C | 2.14845800  | -4.23517400 | 2.61689700  |
| H | 2.25937100  | -5.27817300 | 2.33793500  |
| C | 1.61359400  | -3.90583700 | 3.85604700  |
| H | 1.32325500  | -4.68966800 | 4.54987800  |
| C | 1.41149600  | -2.57095200 | 4.19451000  |
| H | 0.94892700  | -2.33616700 | 5.14471000  |
| C | 1.78372500  | -1.53217400 | 3.33391100  |
| C | 1.53378800  | -0.07186800 | 3.71291500  |
| H | 1.01330600  | 0.39025800  | 2.86345300  |
| C | 0.61180400  | 0.08319900  | 4.92900700  |
| H | 0.38231900  | 1.14257500  | 5.07792400  |
| H | 1.09469700  | -0.27760600 | 5.84554400  |
| H | -0.33225700 | -0.44722900 | 4.79005800  |
| C | 2.82791400  | 0.71963400  | 3.98219100  |
| H | 2.57649000  | 1.73137700  | 4.31955000  |
| H | 3.45864800  | 0.81875200  | 3.09981800  |
| H | 3.41306500  | 0.24266800  | 4.77803100  |
| C | 3.02094500  | -3.59776300 | 0.32472600  |
| H | 3.52355100  | -2.71757400 | -0.07428800 |
| C | 4.03103700  | -4.75389300 | 0.31150000  |
| H | 3.56918500  | -5.69954500 | 0.61522100  |
| H | 4.42548500  | -4.89792400 | -0.70131000 |
| H | 4.87708200  | -4.56677900 | 0.98245400  |
| C | 1.83668600  | -3.90728100 | -0.60630900 |
| H | 1.06902000  | -3.12900400 | -0.57734400 |
| H | 2.17461300  | -4.02172200 | -1.64299100 |
| H | 1.35151000  | -4.84288300 | -0.31521500 |
| C | -3.43782100 | 2.23190500  | 3.10411800  |
| H | -3.77422400 | 1.23225500  | 2.81833100  |
| C | -2.20379300 | 2.04113200  | 3.99752500  |
| H | -2.46124000 | 1.45313900  | 4.88583400  |
| H | -1.42896000 | 1.50347700  | 3.45382100  |
| H | -1.80210700 | 3.00683000  | 4.32738500  |
| C | -4.56440600 | 2.91704200  | 3.89744100  |
| H | -4.88257300 | 2.27698700  | 4.72824600  |
| H | -4.22921100 | 3.86786700  | 4.32747400  |
| H | -5.43952800 | 3.13097300  | 3.27519100  |
| C | 1.84255200  | -1.40138100 | -2.54741900 |
| O | 1.11588200  | -1.86930400 | -3.33067300 |

|   |            |             |             |
|---|------------|-------------|-------------|
| N | 2.76542800 | -0.98430000 | -1.82634600 |
| C | 4.18688900 | -1.19491800 | -2.21851000 |
| H | 4.71183900 | -0.28247000 | -1.93441500 |
| H | 4.58318300 | -1.99728500 | -1.58901700 |
| C | 4.39370500 | -1.50971600 | -3.69392700 |
| H | 3.88441100 | -2.43394500 | -3.98621200 |
| H | 4.02227300 | -0.69746500 | -4.32648400 |
| H | 5.46290600 | -1.63621300 | -3.89345900 |

Cartesian coordinates of the optimized geometry for **4** at B3LYP-D3BJ/6-31G\* level of theory (number of imaginary frequencies = 0):

|    |             |             |             |
|----|-------------|-------------|-------------|
| Cl | -1.44763700 | 1.13148900  | -2.94253400 |
| P  | -0.25205700 | -0.71364200 | 0.31797400  |
| Ga | -1.76611300 | 0.57093200  | -0.80067700 |
| Ga | 2.00144500  | -0.26862000 | 0.31764800  |
| N  | -3.39468100 | -0.53756700 | -0.98426400 |
| N  | -2.73169600 | 2.09231200  | -0.03678800 |
| N  | 2.83824700  | -1.95564500 | 0.94276900  |
| N  | 3.57146400  | 0.42748900  | -0.57919100 |
| C  | -4.55340700 | 0.04460000  | -1.26345100 |
| C  | -4.73543100 | 1.44198000  | -1.22922400 |
| H  | -5.67709600 | 1.80656500  | -1.61968500 |
| C  | -3.91515300 | 2.38642100  | -0.61042200 |
| C  | -5.76071700 | -0.79145400 | -1.61800500 |
| H  | -5.78683600 | -0.97641200 | -2.69759100 |
| H  | -6.68021100 | -0.27002300 | -1.34337700 |
| H  | -5.73460400 | -1.76222000 | -1.12016700 |
| C  | -4.41502100 | 3.81265900  | -0.55822900 |
| H  | -5.42307500 | 3.88632500  | -0.97065000 |
| H  | -3.74800100 | 4.45426400  | -1.14574600 |
| H  | -4.41923400 | 4.20891900  | 0.45864800  |
| C  | -3.25855800 | -1.96506600 | -0.93482400 |
| C  | -3.13280500 | -2.71070800 | -2.12282800 |
| C  | -2.94511500 | -4.09480000 | -2.01311600 |
| H  | -2.85007000 | -4.68863000 | -2.91767700 |
| C  | -2.86826500 | -4.71523700 | -0.77226400 |
| H  | -2.72133300 | -5.79033200 | -0.70859000 |
| C  | -2.97685500 | -3.95682300 | 0.39143700  |
| H  | -2.89487200 | -4.44434300 | 1.35596800  |
| C  | -3.16278000 | -2.57471200 | 0.33634500  |
| C  | -3.29935400 | -1.74836700 | 1.60700700  |
| H  | -2.83708900 | -0.77655800 | 1.41668800  |
| C  | -4.77784400 | -1.49145000 | 1.94671400  |
| H  | -5.27520400 | -0.90816600 | 1.16658900  |
| H  | -4.86006600 | -0.93067600 | 2.88415600  |
| H  | -5.31921400 | -2.43740500 | 2.06728300  |
| C  | -2.55606900 | -2.34044500 | 2.80738800  |
| H  | -3.04502600 | -3.24553000 | 3.18942600  |
| H  | -2.52873200 | -1.60418600 | 3.61528300  |
| H  | -1.52579900 | -2.58795900 | 2.54267600  |
| C  | -2.17627400 | 3.04162500  | 0.89119900  |
| C  | -1.28220200 | 4.02181000  | 0.42332300  |
| C  | -0.79841900 | 4.97148300  | 1.32882500  |
| H  | -0.10333100 | 5.73194800  | 0.98651500  |
| C  | -1.21005000 | 4.96020600  | 2.65755000  |
| H  | -0.83382800 | 5.70782400  | 3.35077700  |
| C  | -2.09571600 | 3.98251600  | 3.10341900  |
| H  | -2.39745400 | 3.97548600  | 4.14525200  |
| C  | -2.58963700 | 2.99901000  | 2.24056700  |
| C  | -0.83543200 | 4.01567000  | -1.02632700 |
| H  | -1.58292800 | 3.47693400  | -1.60991800 |
| C  | -0.71306100 | 5.41535400  | -1.64198400 |
| H  | -0.48397400 | 5.33060700  | -2.71007500 |
| H  | 0.09266100  | 5.99920700  | -1.18182500 |
| H  | -1.64323300 | 5.98552600  | -1.53534800 |
| C  | 0.48811300  | 3.25485200  | -1.15884900 |

|   |             |             |             |
|---|-------------|-------------|-------------|
| H | 0.45033000  | 2.29244800  | -0.63957900 |
| H | 1.29853800  | 3.83498500  | -0.71825100 |
| H | 0.72615000  | 3.05865700  | -2.20504200 |
| C | -3.56092300 | 1.93927900  | 2.74957300  |
| H | -3.40974800 | 1.05269700  | 2.13196100  |
| C | -5.03284200 | 2.37015900  | 2.59689800  |
| H | -5.33376900 | 2.45936300  | 1.55112200  |
| H | -5.21169900 | 3.33242000  | 3.09226000  |
| H | -5.68942400 | 1.62571600  | 3.06235300  |
| C | -3.29904300 | 1.53660600  | 4.20816900  |
| H | -3.90633900 | 0.65886700  | 4.45858800  |
| H | -3.58491100 | 2.33168800  | 4.90781800  |
| H | -2.24971300 | 1.28227800  | 4.35887200  |
| C | 4.14308500  | -2.17345100 | 0.90333200  |
| C | 5.06200900  | -1.25362900 | 0.36002400  |
| H | 6.10185700  | -1.54911000 | 0.41408200  |
| C | 4.79147200  | -0.11999400 | -0.40564700 |
| C | 4.71991600  | -3.49604300 | 1.35215300  |
| H | 4.91362300  | -4.12271300 | 0.47370300  |
| H | 4.04727500  | -4.04433800 | 2.00862100  |
| H | 5.67625100  | -3.33604100 | 1.85807700  |
| C | 5.96815200  | 0.48199800  | -1.14172400 |
| H | 6.85219200  | -0.14560800 | -1.02010800 |
| H | 6.20309400  | 1.48476800  | -0.77907300 |
| H | 5.74510300  | 0.57490600  | -2.20823700 |
| C | 1.93438400  | -3.02154200 | 1.29235900  |
| C | 1.52323900  | -3.19938200 | 2.62686900  |
| C | 0.63713600  | -4.24706700 | 2.90568100  |
| H | 0.31749200  | -4.40982100 | 3.93014000  |
| C | 0.14912100  | -5.07063900 | 1.89745600  |
| H | -0.54799500 | -5.86896200 | 2.13606300  |
| C | 0.54967600  | -4.86313400 | 0.58183000  |
| H | 0.15032600  | -5.49161000 | -0.20772900 |
| C | 1.44681100  | -3.84404100 | 0.25661100  |
| C | 2.04070100  | -2.33438700 | 3.76748200  |
| H | 2.58427500  | -1.49258400 | 3.33034300  |
| C | 3.02394500  | -3.11485200 | 4.66005100  |
| H | 2.53152300  | -3.98070400 | 5.11791900  |
| H | 3.39397200  | -2.47355900 | 5.46843600  |
| H | 3.88914700  | -3.48137300 | 4.09939500  |
| C | 0.89529700  | -1.76693400 | 4.62182300  |
| H | 0.18535800  | -1.19340100 | 4.02425700  |
| H | 1.29935900  | -1.10478500 | 5.39649000  |
| H | 0.34698900  | -2.56582900 | 5.13389800  |
| C | 1.85931300  | -3.64162000 | -1.19281900 |
| H | 2.51954200  | -2.77319800 | -1.24321500 |
| C | 2.65408500  | -4.84436400 | -1.72843700 |
| H | 2.03796300  | -5.75069300 | -1.73816300 |
| H | 3.53690600  | -5.05012200 | -1.11367400 |
| H | 2.98929100  | -4.65590500 | -2.75499700 |
| C | 0.64755400  | -3.35069200 | -2.08775400 |
| H | 0.97814400  | -3.08554200 | -3.09755700 |
| H | 0.04483500  | -2.53101900 | -1.69219900 |
| H | -0.01216700 | -4.22027500 | -2.16944400 |
| C | 3.44208600  | 1.51188200  | -1.51891200 |
| C | 3.87626700  | 2.80112700  | -1.15022300 |
| C | 3.81703000  | 3.81617800  | -2.11061100 |
| H | 4.14445900  | 4.81745200  | -1.84886700 |
| C | 3.33649900  | 3.56415900  | -3.38976700 |
| H | 3.29932900  | 4.36320900  | -4.12477200 |
| C | 2.88047700  | 2.29168700  | -3.72471600 |
| H | 2.48284600  | 2.11835300  | -4.71708900 |
| C | 2.91500400  | 1.24090200  | -2.80192700 |
| C | 2.40516300  | -0.15041400 | -3.17936300 |
| H | 1.73875000  | -0.49254900 | -2.37512600 |
| C | 1.56529000  | -0.16254300 | -4.46223100 |
| H | 1.12284400  | -1.15426900 | -4.59680300 |
| H | 2.18035300  | 0.04391700  | -5.34652400 |



|   |             |             |             |
|---|-------------|-------------|-------------|
| H | 0.74766400  | 0.55895700  | -4.41764700 |
| C | 3.55057500  | -1.17100200 | -3.32482300 |
| H | 3.15146700  | -2.13202600 | -3.66740700 |
| H | 4.08400200  | -1.35190600 | -2.39108800 |
| H | 4.27280100  | -0.82635500 | -4.07463900 |
| C | 4.35794600  | 3.12035800  | 0.26095900  |
| H | 4.58964900  | 2.17789200  | 0.76526300  |
| C | 5.62600000  | 3.98873800  | 0.28568700  |
| H | 5.42823500  | 5.00109000  | -0.08324200 |
| H | 5.99416400  | 4.08369100  | 1.31315000  |
| H | 6.43029300  | 3.56631400  | -0.32670700 |
| C | 3.23510800  | 3.78986900  | 1.06867800  |
| H | 2.34422500  | 3.16117300  | 1.08593600  |
| H | 3.55428100  | 3.96436200  | 2.10219600  |
| H | 2.96128400  | 4.75694800  | 0.63085100  |
| C | -3.18317500 | -2.07144600 | -3.50428800 |
| H | -3.43211600 | -1.01417600 | -3.38818400 |
| C | -1.80619400 | -2.12245200 | -4.18472400 |
| H | -1.84514800 | -1.62476500 | -5.16030700 |
| H | -1.06336700 | -1.60486800 | -3.57756800 |
| H | -1.47705000 | -3.15689300 | -4.33818800 |
| C | -4.25031700 | -2.72251600 | -4.40113800 |
| H | -4.33648000 | -2.17394600 | -5.34602000 |
| H | -3.99003600 | -3.75876700 | -4.64539700 |
| H | -5.23450600 | -2.73656800 | -3.92118700 |
| C | 0.05211900  | 0.33424100  | 1.89170800  |
| O | -0.79799600 | 0.53506500  | 2.75566800  |
| N | 1.37688600  | 0.67286800  | 1.91417800  |
| C | 1.97622000  | 1.28033100  | 3.10556200  |
| H | 2.01635000  | 0.54669800  | 3.92049300  |
| H | 3.01594800  | 1.51243400  | 2.84663800  |
| C | 1.26105000  | 2.53572600  | 3.60979300  |
| H | 1.09769400  | 3.25581200  | 2.80586800  |
| H | 0.28331400  | 2.27892400  | 4.01570800  |
| H | 1.86027600  | 3.01668600  | 4.39298000  |

## 6. References

- [1] M. K. Sharma, C. Wölper, G. Haberhauer, S. Schulz, *Angew. Chem. Int. Ed.* **2021**, *60*, 6784–6790; *Angew. Chem.* **2021**, *133*, 6859–6865.
- [2] G. R. Fulmer, A. J. M. Miller, N. H. Sherden, H. E. Gottlieb, A. Nudelman, B. M. Stoltz, J. E. Bercaw, K. I. Goldberg, *Organometallics* **2010**, *29*, 2176–2179.
- [3] G. M. Sheldrick, *Acta Crystallogr., Sect. A.* **1990**, *A46*, 467–473.
- [4] G. M. Sheldrick, SHELX 2014, Program for the Refinement of Crystal Structures, University of Göttingen: Göttingen, Germany, **2014**.
- [5] G. M. Sheldrick, *Acta Crystallogr., Sect. A* **2008**, *A64*, 112–122.
- [6] C. B. Hübschle, G. M. Sheldrick, B. Dittrich, *J. Appl. Crystallogr.* **2011**, *44*, 1281–1284.
- [7] A. L. Spek, *Acta Cryst.* **1990**, *A46*, 194–201.
- [8] M. J. Frisch, G. W. Trucks, H. B. Schlegel, G. E. Scuseria, M. A. Robb, J. R. Cheeseman, G. Scalmani, V. Barone, G. A. Petersson, H. Nakatsuji, X. Li, M. Caricato, A. V. Marenich, J. Bloino, B. G. Janesko, R. Gomperts, B. Mennucci, H. P. Hratchian, J. V. Ortiz, A. F. Izmaylov, J. L. Sonnenberg, D. Williams-Young, F. Ding, F. Lipparini, F. Egidi, J. Goings, B. Peng, A. Petrone, T. Henderson, D. Ranasinghe, V. G. Zakrzewski, J. Gao, N. Rega, G. Zheng, W. Liang, M. Hada, M. Ehara, K. Toyota, R. Fukuda, J. Hasegawa, M. Ishida, T. Nakajima, Y. Honda, O. Kitao, H. Nakai, T. Vreven, K. Throssell, J. A. Montgomery, Jr.; , J. E. Peralta, F. Ogliaro, M. J. Bearpark, J. J. Heyd, E. N. Brothers, K. N. Kudin, V. N. Staroverov, T. A. Keith, R. Kobayashi, J. Normand, K. Raghavachari, A. P. Rendell, J. C. Burant, S. S. Iyengar, J. Tomasi, M. Cossi, J. M. Millam, M. Klene, C. Adamo, R. Cammi, J. W. Ochterski, R. L. Martin, K. Morokuma, O. Farkas, J. B. Foresman, D. J. Fox, Gaussian, Inc., Wallingford CT, **2016**.
- [9] a) A. D. Becke, *Phys. Rev. A* **1988**, *38*, 3098–3100. b) C. Lee, W. Yang, R. G. Parr, *Phys. Rev. B* **1988**, *37*, 785–789. c) B. Miehlich, A. Savin, H. Stoll, H. Preuss, *Chem. Phys. Lett.* **1989**, *157*, 200–206.
- [10] S. Grimme, S. Ehrlich, L. Goerigk, *J. Comp. Chem.* **2011**, *32*, 1456–1465.
